# Supplementary material for: Genome-scale CRISPR-Cas9 knockout screening in gastrointestinal stromal tumor with Imatinib resistance
Source: Mol Cancer. 2018 Aug 13;17:121. doi: 10.1186/s12943-018-0865-2 (PMC6090611; doi:10.1186/s12943-018-0865-2)
Supplement: Supplementary file 5 — Table S3. The results of high-throughput sequencing analysis. (XLSX 263 kb) [file 12943_2018_865_MOESM5_ESM.xlsx]

## Sheet: GIST-T1-a
seq	gene_id	UID	seq	Total reads of sgRNAs	gene_id	sgRNA diversity
CTGCAGCCAAATGCCGCAAC	FOS	HGLibA_17794	CTGCAGCCAAATGCCGCAAC	552746	FOS	2
TCTTTCACCTCCTCGATATC	IRF1	HGLibA_30858	TCTTTCACCTCCTCGATATC	105404	IRF1	3
TCAGTACGAGGATGTCGTCC	PPP1CB	HGLibA_45295	TCAGTACGAGGATGTCGTCC	52023	PPP1CB	2
TGTTGGGGACAAGCCTTCAT	TCF12	HGLibA_56049	TGTTGGGGACAAGCCTTCAT	24460	TCF12	2
ACGAGCGCACCTGCATGAAC	SOCS6	HGLibA_53427	ACGAGCGCACCTGCATGAAC	17656	SOCS6	3
CCTACCACACGAGCTGTCAC	PRDX6	HGLibA_45710	CCTACCACACGAGCTGTCAC	17406	PRDX6	1
AGGTGACCACCGGAGTGCAC	FOS	HGLibA_17795	AGGTGACCACCGGAGTGCAC	16280
CCGCTATCGAAAATGTCTTC	NR3C1	HGLibA_39906	CCGCTATCGAAAATGTCTTC	10131	NR3C1	1
AAGATTAAAATCACATTGCC	hsa-mir-23b	HGLibA_23388	AAGATTAAAATCACATTGCC	6596	hsa-mir-23b	4
GTCATGAACCACGTTAACAG	JUN	HGLibA_31291	GTCATGAACCACGTTAACAG	6087	JUN	1
GTGTAGCTGCTGTGGTCATC	IRF1	HGLibA_30860	GTGTAGCTGCTGTGGTCATC	5963
ACACTTGCTGGTTTCCTCTC	hsa-mir-505	HGLibA_26535	ACACTTGCTGGTTTCCTCTC	5955	hsa-mir-505	3
TACCACGAAACCTGAGAACA	ADAMDEC1	HGLibA_00788	TACCACGAAACCTGAGAACA	3474	ADAMDEC1	2
CAGCCACGTACCAACATTCA	PKM	HGLibA_44119	CAGCCACGTACCAACATTCA	2940	PKM	1
GGCGTGAGGGTATGTGCCTT	hsa-mir-455	HGLibA_25683	GGCGTGAGGGTATGTGCCTT	2618	hsa-mir-455	1
TGATCAGATGTCTAACGATA	ARNT	HGLibA_03062	TGATCAGATGTCTAACGATA	2508	ARNT	1
GGTGCGAGGCCTATGTCTCT	TAP1	HGLibA_55604	GGTGCGAGGCCTATGTCTCT	2120	TAP1	1
CCGGTTCATGCCGCCCATGC	TP53	HGLibA_58335	CCGGTTCATGCCGCCCATGC	2013	TP53	1
GTGCCCGTGCCATCCGACCA	ZFP36	HGLibA_62491	GTGCCCGTGCCATCCGACCA	1904	ZFP36	3
GGCGCTGCTCTCAGGTGCTC	hsa-mir-23b	HGLibA_23385	GGCGCTGCTCTCAGGTGCTC	1749
CATGGCCAACCGTTACACCA	ZFP36	HGLibA_62493	CATGGCCAACCGTTACACCA	1570
CCTTGCAGTCAGCGTCACCG	RHOQ	HGLibA_48486	CCTTGCAGTCAGCGTCACCG	1303	RHOQ	1
CCAATATGTGCAGCGTTACC	KCMF1	HGLibA_31409	CCAATATGTGCAGCGTTACC	1254	KCMF1	1
CCCAAAGGTAAACTATCCAG	LOC100132247	HGLibA_34094	CCCAAAGGTAAACTATCCAG	1151	LOC100132247	1
CAGCTGTACTAGAGTTACGG	CREB1	HGLibA_11086	CAGCTGTACTAGAGTTACGG	1113	CREB1	1
CTCACCTGTCGTCGACGTGC	RIPK4	HGLibA_48613	CTCACCTGTCGTCGACGTGC	1103	RIPK4	1
CGGGCCGAACCTATCCGCAC	MOXD1	HGLibA_36986	CGGGCCGAACCTATCCGCAC	1085	MOXD1	2
TTTGACTGTTACTCTGCTCC	DEFB121	HGLibA_12871	TTTGACTGTTACTCTGCTCC	1041	DEFB121	1
CTAGTCCAGCTTCGAGCACA	KIF5B	HGLibA_32240	CTAGTCCAGCTTCGAGCACA	1034	KIF5B	1
CTAACTACGGTGCCCTCCTC	RAMP1	HGLibA_47469	CTAACTACGGTGCCCTCCTC	1031	RAMP1	1
CCGTGTCGCTCTCGTGCAGC	RCN3	HGLibA_47996	CCGTGTCGCTCTCGTGCAGC	951	RCN3	1
CGAAACCTCATCCGCCTCTA	TNK2	HGLibA_58134	CGAAACCTCATCCGCCTCTA	931	TNK2	1
GTCACCTGAGGCCACGGAGG	hsa-mir-6829	HGLibA_28547	GTCACCTGAGGCCACGGAGG	910	hsa-mir-6829	1
TATTTCATGGGTGCCATATT	OR7E24	HGLibA_41766	TATTTCATGGGTGCCATATT	892	OR7E24	1
CGGGACCTTGTGCATGACGC	ELF4	HGLibA_14901	CGGGACCTTGTGCATGACGC	884	ELF4	1
GTCCTTGTCTAGTACAGCCC	SOX5	HGLibA_53555	GTCCTTGTCTAGTACAGCCC	884	SOX5	1
CGTACGTCACTGCTCTGCGC	STK19	HGLibA_54755	CGTACGTCACTGCTCTGCGC	866	STK19	1
TCGGACCCTACCATGTTCTC	ADAMDEC1	HGLibA_00787	TCGGACCCTACCATGTTCTC	865
CCCTGTAGAATGAAGCTGAT	ARPC3	HGLibA_03083	CCCTGTAGAATGAAGCTGAT	863	ARPC3	1
CCAAGGTCCTAGAGGCGGAT	PSORS1C1	HGLibA_46506	CCAAGGTCCTAGAGGCGGAT	855	PSORS1C1	2
ACTTCAACAGTCCGCCCATT	MTDH	HGLibA_37622	ACTTCAACAGTCCGCCCATT	845	MTDH	1
CCAGGCCCTTCCTCCAATAC	hsa-mir-4666b	HGLibA_25835	CCAGGCCCTTCCTCCAATAC	841	hsa-mir-4666b	1
AACGAGGCTGTCTCCGTAAC	HIATL1	HGLibA_21279	AACGAGGCTGTCTCCGTAAC	831	HIATL1	1
ATCGTTTCCGCTTAACGGCG	NonTargetingControlGuideForHuman_0003	HGLibA_64386	ATCGTTTCCGCTTAACGGCG	824	NonTargetingControlGuideForHuman_0003	1
CATCCATCTCCACGTTGACC	KRT13	HGLibA_32711	CATCCATCTCCACGTTGACC	802	KRT13	2
CGATGACAGCAAAGACGATG	ACADVL	HGLibA_00378	CGATGACAGCAAAGACGATG	802	ACADVL	1
GTGACCAAGCGTCTTCCTTC	WDR33	HGLibA_61356	GTGACCAAGCGTCTTCCTTC	785	WDR33	2
GGCGCTGCTATCCAACGCAC	GPR78	HGLibA_20085	GGCGCTGCTATCCAACGCAC	759	GPR78	1
CGCAGAGTTATCGTGCCAGC	ERG	HGLibA_15464	CGCAGAGTTATCGTGCCAGC	734	ERG	2
GTTGGCATCTACTTCGGACT	TMEM40	HGLibA_57677	GTTGGCATCTACTTCGGACT	714	TMEM40	1
TGCAAAATCAAAGATACATC	CNOT10	HGLibA_10328	TGCAAAATCAAAGATACATC	701	CNOT10	1
TGGCTGAACTCAGTAACCGC	U2AF1L4	HGLibA_59783	TGGCTGAACTCAGTAACCGC	695	U2AF1L4	1
CCCGTACTTCCAGTAGCCCT	HFE	HGLibA_21225	CCCGTACTTCCAGTAGCCCT	683	HFE	1
GTGCATGCTCCTAATGCCCA	ACSM2A	HGLibA_00571	GTGCATGCTCCTAATGCCCA	673	ACSM2A	1
CCTGGTTAAAGCGCTCAAAC	DEDD	HGLibA_12781	CCTGGTTAAAGCGCTCAAAC	667	DEDD	1
TATGTAATGCAGCAGCCGTG	IL1A	HGLibA_30324	TATGTAATGCAGCAGCCGTG	663	IL1A	2
GCAAGCCCTTGAGAACGCGC	CMTM6	HGLibA_10224	GCAAGCCCTTGAGAACGCGC	649	CMTM6	1
TTGGCATGGGAGACGTAATC	LOC729020	HGLibA_34284	TTGGCATGGGAGACGTAATC	646	LOC729020	1
GTAGGCGCGCCGCTCTCTAC	NonTargetingControlGuideForHuman_0004	HGLibA_64387	GTAGGCGCGCCGCTCTCTAC	643	NonTargetingControlGuideForHuman_0004	1
GATTCGTTTAAGACAACAAC	SMIM19	HGLibA_53032	GATTCGTTTAAGACAACAAC	638	SMIM19	1
GCCGTGCACTTACCCTTCTG	OR4F17	HGLibA_41284	GCCGTGCACTTACCCTTCTG	593	OR4F17	1
CCTTGAGAGGCATAGCCATG	hsa-mir-4760	HGLibA_26189	CCTTGAGAGGCATAGCCATG	584	hsa-mir-4760	1
ACCTGTCCGCCAGCTGCATC	LHX4	HGLibA_33744	ACCTGTCCGCCAGCTGCATC	565	LHX4	1
TCTCTCGTGTTACAGCCTCG	PHLPP2	HGLibA_43727	TCTCTCGTGTTACAGCCTCG	563	PHLPP2	1
AGTGGTGCTAGTTGTGTCAT	CYP3A43	HGLibA_12156	AGTGGTGCTAGTTGTGTCAT	562	CYP3A43	1
AGACCACATACGCCAACACC	TRA2B	HGLibA_58514	AGACCACATACGCCAACACC	558	TRA2B	1
ACACCTTCGGTAGTCAAGTC	FGF18	HGLibA_17385	ACACCTTCGGTAGTCAAGTC	551	FGF18	1
GCGCCGTCATGAGACCCGAC	LMNA	HGLibA_33980	GCGCCGTCATGAGACCCGAC	546	LMNA	1
CACTCGTTCGTGTTCACGCG	PPAN	HGLibA_45098	CACTCGTTCGTGTTCACGCG	513	PPAN	1
CTTATCAGGTTGTATTATAA	hsa-mir-374a	HGLibA_24444	CTTATCAGGTTGTATTATAA	500	hsa-mir-374a	1
GGCTACTAACCGCGCTTTCA	RHOBTB2	HGLibA_48463	GGCTACTAACCGCGCTTTCA	475	RHOBTB2	1
GATTAAAGTCCTCGATCTTC	SREBF2	HGLibA_54241	GATTAAAGTCCTCGATCTTC	471	SREBF2	1
CAGTGTGTCCTGAAATTCAC	hsa-mir-4700	HGLibA_25962	CAGTGTGTCCTGAAATTCAC	458	hsa-mir-4700	1
ATCCACCCAGCGTTGTAGAC	42434	HGLibA_35627	ATCCACCCAGCGTTGTAGAC	457	42434	1
TTGCGTTGACGCTCGCGCCC	hsa-mir-1292	HGLibA_22700	TTGCGTTGACGCTCGCGCCC	441	hsa-mir-1292	1
TTCAGATCAATAGCCGCTAC	LYZ	HGLibA_35069	TTCAGATCAATAGCCGCTAC	439	LYZ	2
TCAACCACAGACCTTCCGTC	LONRF1	HGLibA_34308	TCAACCACAGACCTTCCGTC	430	LONRF1	1
CTCAAAAGCATTCCGCTCAA	GPR171	HGLibA_19967	CTCAAAAGCATTCCGCTCAA	426	GPR171	1
TACCACCGGAGTGGTCCGGA	SNIP1	HGLibA_53218	TACCACCGGAGTGGTCCGGA	407	SNIP1	1
TGCCCTGTCCGAGTAGACCA	LMCD1	HGLibA_33968	TGCCCTGTCCGAGTAGACCA	396	LMCD1	1
TGGTCTCTAGATCAGTATCC	ZNF18	HGLibA_62822	TGGTCTCTAGATCAGTATCC	396	ZNF18	1
GGACGTTCAATTGTCATCAC	hsa-mir-204	HGLibA_23228	GGACGTTCAATTGTCATCAC	384	hsa-mir-204	3
TTCACCGTTGATATCGCAGC	SOCS6	HGLibA_53426	TTCACCGTTGATATCGCAGC	372
AGGAACCTCCGTGATCGATT	PIP4K2C	HGLibA_43998	AGGAACCTCCGTGATCGATT	350	PIP4K2C	1
TGATCGCATCGTCGAGCTCT	C20orf85	HGLibA_06028	TGATCGCATCGTCGAGCTCT	343	C20orf85	1
ATGCAATGGCGCAGCCCCCC	PHF1	HGLibA_43618	ATGCAATGGCGCAGCCCCCC	332	PHF1	1
CAAGGGCTTTGATGTCTTGT	hsa-mir-8065	HGLibA_29154	CAAGGGCTTTGATGTCTTGT	330	hsa-mir-8065	1
CACTATCTACCTGCTGACCG	OR10C1	HGLibA_40774	CACTATCTACCTGCTGACCG	328	OR10C1	1
CACTTTCTGCCTCCCGTCCA	C12orf71	HGLibA_05288	CACTTTCTGCCTCCCGTCCA	327	C12orf71	1
TACCTTTCCATTCATATCTT	RBMY1A1	HGLibA_47898	TACCTTTCCATTCATATCTT	325	RBMY1A1	1
ATTTATCACACAACCTTTCG	ZNF709	HGLibA_63893	ATTTATCACACAACCTTTCG	324	ZNF709	1
GCCGTGACTGTCAGTCTTAT	PCOLCE	HGLibA_42941	GCCGTGACTGTCAGTCTTAT	321	PCOLCE	1
TCCACAGATCGAGTTTAACA	MYL6B	HGLibA_38059	TCCACAGATCGAGTTTAACA	316	MYL6B	1
ATGTCTTACCAACCCATCCA	CINP	HGLibA_09716	ATGTCTTACCAACCCATCCA	312	CINP	1
TTATGAAGGGATCGATCACC	BEND4	HGLibA_04408	TTATGAAGGGATCGATCACC	307	BEND4	1
TCGATCACTCGCCGCACCAA	PPP3R2	HGLibA_45485	TCGATCACTCGCCGCACCAA	303	PPP3R2	1
AGGCCGCCACGTGTTGCATC	CELF6	HGLibA_09018	AGGCCGCCACGTGTTGCATC	299	CELF6	2
TGTCATCGTCTACGAGTTGC	AP1M2	HGLibA_02294	TGTCATCGTCTACGAGTTGC	295	AP1M2	1
ACCATGATATCACACCTCCC	hsa-mir-3689a	HGLibA_24368	ACCATGATATCACACCTCCC	286	hsa-mir-3689a	2
GCTTGAAGTCGCAGTTTCCC	hsa-mir-3164	HGLibA_23790	GCTTGAAGTCGCAGTTTCCC	284	hsa-mir-3164	1
GACATACCACATGCCTGACG	TRIM64C	HGLibA_58870	GACATACCACATGCCTGACG	279	TRIM64C	1
TCCCTGCATTCATGGTTTTA	NonTargetingControlGuideForHuman_0923	HGLibA_65306	TCCCTGCATTCATGGTTTTA	278	NonTargetingControlGuideForHuman_0923	1
AGGGAGATCCGTTCTTGCAC	ZNF804B	HGLibA_64079	AGGGAGATCCGTTCTTGCAC	266	ZNF804B	1
AGCATTATGCAGGGGTGGGC	hsa-mir-6809	HGLibA_28468	AGCATTATGCAGGGGTGGGC	261	hsa-mir-6809	1
CCCCTTGTATGACGCGCAGA	NEU2	HGLibA_39002	CCCCTTGTATGACGCGCAGA	256	NEU2	1
GGTAGCCAGGATGCGCTACG	ST8SIA5	HGLibA_54588	GGTAGCCAGGATGCGCTACG	250	ST8SIA5	1
TCCTCGACACCAGGGCGTTA	ACTBL2	HGLibA_00604	TCCTCGACACCAGGGCGTTA	247	ACTBL2	1
AGTCTTACCACTCTGTATTC	ASAH2B	HGLibA_03192	AGTCTTACCACTCTGTATTC	247	ASAH2B	1
ATTTAAACCGTTACACAGTC	NonTargetingControlGuideForHuman_0606	HGLibA_64989	ATTTAAACCGTTACACAGTC	247	NonTargetingControlGuideForHuman_0606	1
TATTCAGTCACCAAGCAAAG	CENPC1	HGLibA_09049	TATTCAGTCACCAAGCAAAG	238	CENPC1	1
GCAGCAGCGGTACCGTTACG	NADKD1	HGLibA_38338	GCAGCAGCGGTACCGTTACG	238	NADKD1	1
CTCCACCACGTATTCCTACA	MAN1A2	HGLibA_35349	CTCCACCACGTATTCCTACA	232	MAN1A2	1
ACTGATCCAGTCCATCCAGA	MROH8	HGLibA_37168	ACTGATCCAGTCCATCCAGA	227	MROH8	1
CGCCAACTCAGACAACTCCG	C8orf34	HGLibA_06611	CGCCAACTCAGACAACTCCG	223	C8orf34	2
TGTCTTCGATGTTCGAGAAC	PREX1	HGLibA_45731	TGTCTTCGATGTTCGAGAAC	215	PREX1	1
ACTATAGAGTCTGCTTGTAC	CCRN4L	HGLibA_08180	ACTATAGAGTCTGCTTGTAC	214	CCRN4L	1
TCGCTCCTTATTTGGCCTTA	HIST1H2AH	HGLibA_21394	TCGCTCCTTATTTGGCCTTA	210	HIST1H2AH	1
TCAGCGTCAAGCCAAGTACA	SRGAP2B	HGLibA_54260	TCAGCGTCAAGCCAAGTACA	207	SRGAP2B	1
CCGTCATTACTATAAACTAC	KCNH5	HGLibA_31509	CCGTCATTACTATAAACTAC	206	KCNH5	1
CTGAACAATGAATGCAACTG	hsa-mir-181b-1	HGLibA_23020	CTGAACAATGAATGCAACTG	205	hsa-mir-181b-1	1
GTTCCGCTACTGCCGCATGC	DERL3	HGLibA_13002	GTTCCGCTACTGCCGCATGC	204	DERL3	1
TTTATATCAAGGCACATAAA	hsa-mir-3910-1	HGLibA_24558	TTTATATCAAGGCACATAAA	204	hsa-mir-3910-1	1
CATTGACATCAATCTGTGTC	SCRG1	HGLibA_50332	CATTGACATCAATCTGTGTC	199	SCRG1	1
GAGGACTTGCGCCGTGAGTT	SRSF12	HGLibA_54358	GAGGACTTGCGCCGTGAGTT	197	SRSF12	1
CACTTCTCATTGCCACTGCG	EIF2AK3	HGLibA_14730	CACTTCTCATTGCCACTGCG	193	EIF2AK3	1
TTTCAAGGAGGCGGCCGACA	CKAP4	HGLibA_09761	TTTCAAGGAGGCGGCCGACA	192	CKAP4	1
AGTATACATACCCTCAAATC	MTMR2	HGLibA_37711	AGTATACATACCCTCAAATC	188	MTMR2	2
GTTTGTTGTAAGGATCGTTG	hsa-mir-8068	HGLibA_29166	GTTTGTTGTAAGGATCGTTG	183	hsa-mir-8068	1
TCGTATGTGCCCTCGTCAGA	CD80	HGLibA_08452	TCGTATGTGCCCTCGTCAGA	180	CD80	1
CCTTGTTGAGGACATCTCGC	DUSP16	HGLibA_14148	CCTTGTTGAGGACATCTCGC	179	DUSP16	1
TTGTCCTTAGGTGCTGTTGA	RRAGB	HGLibA_49515	TTGTCCTTAGGTGCTGTTGA	178	RRAGB	1
TCGGCATGGCCCCATTCGCA	FANCF	HGLibA_16849	TCGGCATGGCCCCATTCGCA	173	FANCF	1
TACCTGTAATCCCAGCTACT	KCNRG	HGLibA_31670	TACCTGTAATCCCAGCTACT	173	KCNRG	1
TTACCCTCATCTACTTGAAC	BIRC3	HGLibA_04518	TTACCCTCATCTACTTGAAC	170	BIRC3	1
CCCGCCCTACTCTCAGGAGG	hsa-mir-6719	HGLibA_28091	CCCGCCCTACTCTCAGGAGG	170	hsa-mir-6719	1
GTGAACAAACCTTCTTCATC	BTN1A1	HGLibA_04960	GTGAACAAACCTTCTTCATC	163	BTN1A1	1
GAGTCACCACCGTCCGTTCT	RHBDD2	HGLibA_48414	GAGTCACCACCGTCCGTTCT	163	RHBDD2	1
CGCGCTTCTGTCTGTACACG	SHROOM2	HGLibA_51377	CGCGCTTCTGTCTGTACACG	160	SHROOM2	1
TTACCTTTGCCGAATTATGC	ST8SIA1	HGLibA_54577	TTACCTTTGCCGAATTATGC	160	ST8SIA1	1
GAAGAGCGTCCCCCCGGGCG	EIF4EBP2	HGLibA_14830	GAAGAGCGTCCCCCCGGGCG	158	EIF4EBP2	1
CTGCCTCCTCCTCCTGTCCC	hsa-mir-4298	HGLibA_24958	CTGCCTCCTCCTCCTGTCCC	156	hsa-mir-4298	1
CGCAGTGAGCCTAAGTTCAC	KIR3DL3	HGLibA_32285	CGCAGTGAGCCTAAGTTCAC	152	KIR3DL3	1
GCCACTCATCTTCGTTGTCC	KAT5	HGLibA_31344	GCCACTCATCTTCGTTGTCC	146	KAT5	1
CCCGAACATTGTCAGGATCA	GPKOW	HGLibA_19814	CCCGAACATTGTCAGGATCA	143	GPKOW	2
TACTCACGCTGAATAGGTCC	CSDC2	HGLibA_11311	TACTCACGCTGAATAGGTCC	143	CSDC2	1
CTTATTACTAGATGATTCGC	PRDX5	HGLibA_45707	CTTATTACTAGATGATTCGC	139	PRDX5	1
CCTCACGCAGCGGATGACGG	SGSH	HGLibA_51144	CCTCACGCAGCGGATGACGG	137	SGSH	2
CTTTAGCACTCTCCCATTGC	hsa-mir-4636	HGLibA_25705	CTTTAGCACTCTCCCATTGC	137	hsa-mir-4636	1
TCACTGCCTACACGAGTCCC	NLRP13	HGLibA_39397	TCACTGCCTACACGAGTCCC	134	NLRP13	1
TCTTTAGTTAAGGGATGTAA	LOC100129636	HGLibA_34057	TCTTTAGTTAAGGGATGTAA	132	LOC100129636	1
GCCCTACCTGCGTCAGTGTA	CARD11	HGLibA_07219	GCCCTACCTGCGTCAGTGTA	131	CARD11	2
TGTGCGTCCGAGAGGCAACA	PDHA1	HGLibA_43149	TGTGCGTCCGAGAGGCAACA	130	PDHA1	2
CCACAGCCCACGCATATAGC	QARS	HGLibA_47007	CCACAGCCCACGCATATAGC	127	QARS	1
ATCAGCACTACTGTCTCTTT	RBM44	HGLibA_47846	ATCAGCACTACTGTCTCTTT	127	RBM44	1
ATGGCCGCGGACGAAGTTGC	SMARCD3	HGLibA_52924	ATGGCCGCGGACGAAGTTGC	127	SMARCD3	1
CTTCCCACATGATAATGTAG	ASB8	HGLibA_03252	CTTCCCACATGATAATGTAG	125	ASB8	1
ATACTCCACCATACGTTTGT	RAB5B	HGLibA_47252	ATACTCCACCATACGTTTGT	125	RAB5B	1
CCCATCCAGGCCTTCATTTC	PPP1R14B	HGLibA_45326	CCCATCCAGGCCTTCATTTC	124	PPP1R14B	1
GTTGGGTCGCCGAAGCTCTC	RAB11FIP5	HGLibA_47094	GTTGGGTCGCCGAAGCTCTC	123	RAB11FIP5	1
TTTGGCCGAATCTTCATGCA	FBXO24	HGLibA_17051	TTTGGCCGAATCTTCATGCA	121	FBXO24	1
ACCCGCAGACTCCTCCACGC	DNAAF1	HGLibA_13460	ACCCGCAGACTCCTCCACGC	119	DNAAF1	1
CATTGACCTGACCCGCGTGC	KRT13	HGLibA_32710	CATTGACCTGACCCGCGTGC	119
CTATCTGCATGTCGCCGAAA	CYFIP2	HGLibA_12033	CTATCTGCATGTCGCCGAAA	116	CYFIP2	1
GAGAGTGGGCGCTGCCGCTA	ZFP36	HGLibA_62492	GAGAGTGGGCGCTGCCGCTA	116
GATCTTGCGATCCTTCTCCA	TAS2R50	HGLibA_55709	GATCTTGCGATCCTTCTCCA	115	TAS2R50	2
CCCCAACGTGATCAGCATAC	ATP13A2	HGLibA_03569	CCCCAACGTGATCAGCATAC	115	ATP13A2	1
GACTGAAACTACACTTTAAG	hsa-mir-3144	HGLibA_23688	GACTGAAACTACACTTTAAG	114	hsa-mir-3144	1
AAGGGTCTTACCTCGGCATG	HDAC9	HGLibA_21027	AAGGGTCTTACCTCGGCATG	113	HDAC9	1
GCTTCGCCCCTAACCAGACC	EPB41L1	HGLibA_15242	GCTTCGCCCCTAACCAGACC	110	EPB41L1	1
GTGGCCTCACGCTGTGAAAC	DNAJC4	HGLibA_13621	GTGGCCTCACGCTGTGAAAC	109	DNAJC4	1
TGCCATCAGCTTCTAGGGTG	hsa-mir-6741	HGLibA_28170	TGCCATCAGCTTCTAGGGTG	104	hsa-mir-6741	1
AACCTCGTTCAACATCAGCG	ZNF417	HGLibA_63236	AACCTCGTTCAACATCAGCG	100	ZNF417	1
CAACCCCAGTATCCCGTCTT	GPAM	HGLibA_19725	CAACCCCAGTATCCCGTCTT	98	GPAM	1
CATAAATAAAGTTCATCTTA	LMLN	HGLibA_33979	CATAAATAAAGTTCATCTTA	94	LMLN	1
CCGACTCAGCATCGCAGTAT	PRSS35	HGLibA_46218	CCGACTCAGCATCGCAGTAT	91	PRSS35	1
AGCCTCCGTAGCCGTAGCCC	KRTAP19-5	HGLibA_32963	AGCCTCCGTAGCCGTAGCCC	88	KRTAP19-5	1
CGTTATGGATACATAACCTG	MRPL22	HGLibA_37219	CGTTATGGATACATAACCTG	88	MRPL22	1
CCTCGGCGGCGCGCACAGCG	SH3D21	HGLibA_51232	CCTCGGCGGCGCGCACAGCG	88	SH3D21	1
CTTACAGTTTGAGGATAATC	DNAH12	HGLibA_13478	CTTACAGTTTGAGGATAATC	87	DNAH12	1
CGAGAGCTTCTCTGCGCGCG	KLHL30	HGLibA_32468	CGAGAGCTTCTCTGCGCGCG	86	KLHL30	1
GACTGGGATGTCACTGAATA	hsa-mir-6506	HGLibA_27928	GACTGGGATGTCACTGAATA	84	hsa-mir-6506	1
GACTACGTCACACCAGAAGT	SFMBT2	HGLibA_51012	GACTACGTCACACCAGAAGT	83	SFMBT2	2
TGTCCCGGCGCGCAGATTGC	CORT	HGLibA_10796	TGTCCCGGCGCGCAGATTGC	82	CORT	1
GCTTGAGAACGCAGATCTCG	DBH	HGLibA_12383	GCTTGAGAACGCAGATCTCG	82	DBH	1
TCTCTGTCTTGATGGCGGGA	TEDDM1	HGLibA_56248	TCTCTGTCTTGATGGCGGGA	81	TEDDM1	2
GCCCGACTACTACCGCGACA	DUPD1	HGLibA_14108	GCCCGACTACTACCGCGACA	81	DUPD1	1
CTTTCATGACCAGGAGGCTG	hsa-mir-665	HGLibA_28056	CTTTCATGACCAGGAGGCTG	80	hsa-mir-665	2
ATTCACGACTGAGTTCTTTG	LDB1	HGLibA_33500	ATTCACGACTGAGTTCTTTG	80	LDB1	2
CTTTCAACAAATACTTATTG	hsa-mir-1264	HGLibA_22532	CTTTCAACAAATACTTATTG	80	hsa-mir-1264	1
CGTTGTAGAACGCCTTCCCA	WTIP	HGLibA_61723	CGTTGTAGAACGCCTTCCCA	80	WTIP	1
TCTTCAGTCGATGCCAGCAT	TRAPPC8	HGLibA_58625	TCTTCAGTCGATGCCAGCAT	79	TRAPPC8	2
TACCTGCAGGTGACGGACTT	PRKACG	HGLibA_45798	TACCTGCAGGTGACGGACTT	78	PRKACG	1
ACCCGCACCCGCCTCACTCG	SERINC2	HGLibA_50775	ACCCGCACCCGCCTCACTCG	77	SERINC2	2
TGGATCCCTAGGAAAATCAG	NSMAF	HGLibA_40050	TGGATCCCTAGGAAAATCAG	77	NSMAF	1
ATGAAATCCATCTACTGCCC	GTF2A1	HGLibA_20520	ATGAAATCCATCTACTGCCC	76	GTF2A1	2
CCCAGGACTCTTTCATGACC	hsa-mir-665	HGLibA_28055	CCCAGGACTCTTTCATGACC	76
TGACTCACCCGTGGATCTCG	C19orf18	HGLibA_05632	TGACTCACCCGTGGATCTCG	75	C19orf18	1
GACTCGACTACAGATTTCAC	GOT1L1	HGLibA_19692	GACTCGACTACAGATTTCAC	75	GOT1L1	1
ACATCAAAGGTCGATGCTCG	MBNL3	HGLibA_35803	ACATCAAAGGTCGATGCTCG	74	MBNL3	1
ATGAATTTCGATCGTTCTTC	GPNMB	HGLibA_19833	ATGAATTTCGATCGTTCTTC	73	GPNMB	2
GAGAGACATTCAGCCTATAA	BTN3A1	HGLibA_04968	GAGAGACATTCAGCCTATAA	73	BTN3A1	1
CGCACTGACCTTATCGTGGG	SBNO2	HGLibA_50098	CGCACTGACCTTATCGTGGG	73	SBNO2	1
CGCGGGCGACGACTACGTGC	SOX11	HGLibA_53518	CGCGGGCGACGACTACGTGC	73	SOX11	1
TCGTGACGCTGAGATACAGA	AS3MT	HGLibA_03182	TCGTGACGCTGAGATACAGA	72	AS3MT	1
CGCACCATATCCAAACATGC	FAM200B	HGLibA_16414	CGCACCATATCCAAACATGC	72	FAM200B	1
GGTCCAGCTATTGCAGTACA	ILK	HGLibA_30508	GGTCCAGCTATTGCAGTACA	72	ILK	1
ATCAAGCATGATTCTAACAT	INVS	HGLibA_30731	ATCAAGCATGATTCTAACAT	72	INVS	1
GTCAACATTAAGCCCTGTTC	PLAA	HGLibA_44217	GTCAACATTAAGCCCTGTTC	72	PLAA	1
CCTCACACGCAAATAGCTGA	HIF1A	HGLibA_21297	CCTCACACGCAAATAGCTGA	70	HIF1A	1
CGTACATTACAATGAGTATG	LGALS13	HGLibA_33639	CGTACATTACAATGAGTATG	70	LGALS13	1
GGTGTACTTGGTCGAGCCCT	C8orf42	HGLibA_06621	GGTGTACTTGGTCGAGCCCT	69	C8orf42	1
GTTCCGTGAGGGTTACTTCA	NonTargetingControlGuideForHuman_0207	HGLibA_64590	GTTCCGTGAGGGTTACTTCA	69	NonTargetingControlGuideForHuman_0207	1
ACGATCGGTAATGGTCTGTT	NonTargetingControlGuideForHuman_0270	HGLibA_64653	ACGATCGGTAATGGTCTGTT	69	NonTargetingControlGuideForHuman_0270	1
TGGTACTTACTTCCAGCTGG	SUDS3	HGLibA_55000	TGGTACTTACTTCCAGCTGG	69	SUDS3	1
CAGCAGTGACATCGCTGACG	LBP	HGLibA_33366	CAGCAGTGACATCGCTGACG	67	LBP	2
AAAGGTACAGTGAGCGCATT	BAZ1B	HGLibA_04187	AAAGGTACAGTGAGCGCATT	67	BAZ1B	1
CGTCATACTGCAGCTGTCCT	SLC46A2	HGLibA_52476	CGTCATACTGCAGCTGTCCT	67	SLC46A2	1
TTCTCCGTTACTACTACGAC	TFPI2	HGLibA_56474	TTCTCCGTTACTACTACGAC	67	TFPI2	1
ACTCACCTCAAATACAAGCG	FKBP4	HGLibA_17575	ACTCACCTCAAATACAAGCG	66	FKBP4	1
TTACCTTATTGCATATGTAG	NOX4	HGLibA_39663	TTACCTTATTGCATATGTAG	66	NOX4	1
ATTACCCGAACTGTTTCCCT	RNASE11	HGLibA_48683	ATTACCCGAACTGTTTCCCT	66	RNASE11	1
ATACGAGGTATTCCTCCGTT	SLAIN2	HGLibA_51597	ATACGAGGTATTCCTCCGTT	65	SLAIN2	1
GTGCGTGCATGAACGAGACC	ECE1	HGLibA_14381	GTGCGTGCATGAACGAGACC	64	ECE1	1
CTGAGCGACCATGGACCGGC	SLC25A26	HGLibA_51974	CTGAGCGACCATGGACCGGC	64	SLC25A26	1
ATGTACGTCGTAGTAACTTC	USP44	HGLibA_60659	ATGTACGTCGTAGTAACTTC	63	USP44	2
CTATCTCCGCATGTATCAGC	TBC1D7	HGLibA_55852	CTATCTCCGCATGTATCAGC	63	TBC1D7	1
GACAGAGAATACCCACGCCT	NCKAP1	HGLibA_38598	GACAGAGAATACCCACGCCT	62	NCKAP1	2
ATCCGATCACTGACCATCAG	ITPRIPL1	HGLibA_31153	ATCCGATCACTGACCATCAG	62	ITPRIPL1	1
GTCTCACGCTTGCAAGTCCT	TMEM213	HGLibA_57501	GTCTCACGCTTGCAAGTCCT	62	TMEM213	1
CCATTCGGATACCTAATTGC	VRK2	HGLibA_61114	CCATTCGGATACCTAATTGC	62	VRK2	1
GCACCAAGGACCTCCAAGAC	ZNF7	HGLibA_63858	GCACCAAGGACCTCCAAGAC	62	ZNF7	1
TCCGTCTGATCCTCCGCCCG	C1orf35	HGLibA_05856	TCCGTCTGATCCTCCGCCCG	61	C1orf35	2
TTATGATGTGTTTCACCAAG	ARL13B	HGLibA_02934	TTATGATGTGTTTCACCAAG	61	ARL13B	1
TGAGACGACAATGGTCCTTG	FAM26E	HGLibA_16565	TGAGACGACAATGGTCCTTG	61	FAM26E	1
TCGTCTTACCCAGCAGTGTT	hsa-mir-200c	HGLibA_23211	TCGTCTTACCCAGCAGTGTT	61	hsa-mir-200c	1
CAATCTAAAGGACCTGTACT	hsa-mir-3684	HGLibA_24343	CAATCTAAAGGACCTGTACT	61	hsa-mir-3684	1
TGCCAACACGATATTTGCTG	E2F8	HGLibA_14329	TGCCAACACGATATTTGCTG	60	E2F8	1
TGTAGCTGTTCTCTTTGCCA	hsa-mir-2117	HGLibA_23296	TGTAGCTGTTCTCTTTGCCA	60	hsa-mir-2117	1
TTTAACTGATTGCCCAGTTC	hsa-mir-4782	HGLibA_26290	TTTAACTGATTGCCCAGTTC	60	hsa-mir-4782	1
CGACGGTAATGCACCTACTA	NonTargetingControlGuideForHuman_0248	HGLibA_64631	CGACGGTAATGCACCTACTA	60	NonTargetingControlGuideForHuman_0248	1
CCAGATGTACTCCATCCCCG	GCK	HGLibA_18788	CCAGATGTACTCCATCCCCG	59	GCK	2
CCGGGCTGTCTGTACTCTTC	F3	HGLibA_15874	CCGGGCTGTCTGTACTCTTC	59	F3	1
GTATTTGATGTCGAATACTG	FAM174B	HGLibA_16286	GTATTTGATGTCGAATACTG	59	FAM174B	1
GTCTGGAGTACAGCTCGTAC	FAM20C	HGLibA_16451	GTCTGGAGTACAGCTCGTAC	59	FAM20C	1
CATCCTCTTATTGGTTGACA	hsa-mir-1179	HGLibA_22265	CATCCTCTTATTGGTTGACA	59	hsa-mir-1179	1
CACTGAAGGGTTTTGAGTGG	hsa-mir-616	HGLibA_27754	CACTGAAGGGTTTTGAGTGG	59	hsa-mir-616	1
GCCGGTAGCCAAACGTGTAC	ODF3L1	HGLibA_40577	GCCGGTAGCCAAACGTGTAC	59	ODF3L1	1
GCAAAGCGGCCATGCGTTCC	QPCTL	HGLibA_47019	GCAAAGCGGCCATGCGTTCC	59	QPCTL	1
ACTTCTGGTCAACCCATTCG	SLC18A1	HGLibA_51774	ACTTCTGGTCAACCCATTCG	59	SLC18A1	1
CTCGATGAGGTCGTATTAGT	CCDC138	HGLibA_07610	CTCGATGAGGTCGTATTAGT	58	CCDC138	2
GCCATGAAGACGGGGGCATC	BTN2A1	HGLibA_04963	GCCATGAAGACGGGGGCATC	58	BTN2A1	1
GTCCCTCTGTGTCCCCCACT	hsa-mir-7847	HGLibA_29031	GTCCCTCTGTGTCCCCCACT	58	hsa-mir-7847	1
AATTATGGCTTCTCTAACGA	HTATSF1	HGLibA_29637	AATTATGGCTTCTCTAACGA	58	HTATSF1	1
TCTTGTTCAAAGCGCACCGC	IRF4	HGLibA_30878	TCTTGTTCAAAGCGCACCGC	58	IRF4	1
GTCCAACTTACACTGCAATG	MS4A6E	HGLibA_37448	GTCCAACTTACACTGCAATG	58	MS4A6E	1
ATGGCGGCAACCGCGTCTGC	RANBP6	HGLibA_47498	ATGGCGGCAACCGCGTCTGC	58	RANBP6	1
ATTCCAATACTCCTTTACGT	TRMU	HGLibA_58992	ATTCCAATACTCCTTTACGT	58	TRMU	1
GCAACTACAAGAAGCGTTCC	ZNF394	HGLibA_63198	GCAACTACAAGAAGCGTTCC	58	ZNF394	1
TGCAAGTATTCCAGACATTA	MOXD1	HGLibA_36988	TGCAAGTATTCCAGACATTA	58
GCAATTAGCTCATTTGCCGC	ABCB9	HGLibA_00155	GCAATTAGCTCATTTGCCGC	57	ABCB9	1
AGGAGTGTTATGAAAAGGCT	NonTargetingControlGuideForHuman_0911	HGLibA_65294	AGGAGTGTTATGAAAAGGCT	57	NonTargetingControlGuideForHuman_0911	1
GGCCAACCAGGCACCGCCGG	ST6GALNAC1	HGLibA_54552	GGCCAACCAGGCACCGCCGG	57	ST6GALNAC1	1
TCTGAGCCCTGTCCTCCCGC	hsa-mir-1233-1	HGLibA_22377	TCTGAGCCCTGTCCTCCCGC	56	hsa-mir-1233-1	2
GCCAGCTTCCATGACATATC	STOX1	HGLibA_54841	GCCAGCTTCCATGACATATC	56	STOX1	2
GCCTGGACATAGTCCTTGAC	FAIM2	HGLibA_15966	GCCTGGACATAGTCCTTGAC	56	FAIM2	1
TGCGGCATCTGTGGTGACTC	LCE3A	HGLibA_33419	TGCGGCATCTGTGGTGACTC	56	LCE3A	1
ATACATACGCCACCTTGCTC	OR13C3	HGLibA_40886	ATACATACGCCACCTTGCTC	56	OR13C3	1
ATATCTAGGTTCACTGGTTG	RPE	HGLibA_49110	ATATCTAGGTTCACTGGTTG	56	RPE	1
CTCCGCTTCCTGCCCGCAGG	hsa-mir-3928	HGLibA_24642	CTCCGCTTCCTGCCCGCAGG	55	hsa-mir-3928	1
GCCAAGAACACTACCATATA	hsa-mir-4657	HGLibA_25790	GCCAAGAACACTACCATATA	55	hsa-mir-4657	1
GTCTTGTCTCCGCATACAAG	LPAR3	HGLibA_34347	GTCTTGTCTCCGCATACAAG	55	LPAR3	1
TTCTGTCTCCTCGCATTCCA	ZNF727	HGLibA_63924	TTCTGTCTCCTCGCATTCCA	55	ZNF727	1
TCCTAGTTGCGACTCCGCCT	AHCYL2	HGLibA_01292	TCCTAGTTGCGACTCCGCCT	54	AHCYL2	1
ATCTCGTGAAGAGCATAACT	CDKL1	HGLibA_08806	ATCTCGTGAAGAGCATAACT	54	CDKL1	1
TGCGCTGGCCACGCTAAACC	CHADL	HGLibA_09344	TGCGCTGGCCACGCTAAACC	54	CHADL	1
CCACCATGGTTAACACAATA	CLRN1	HGLibA_10121	CCACCATGGTTAACACAATA	54	CLRN1	1
TTCTCTCACACTCCCGCACC	GIMAP5	HGLibA_19082	TTCTCTCACACTCCCGCACC	54	GIMAP5	1
AGGCTGCGTCATCGCCAATG	APOL4	HGLibA_02535	AGGCTGCGTCATCGCCAATG	53	APOL4	1
CACATACCCGTACTGTTTGT	AVPR1A	HGLibA_03904	CACATACCCGTACTGTTTGT	53	AVPR1A	1
CACCAACCTAACCTTGTTTT	hsa-mir-548t	HGLibA_27122	CACCAACCTAACCTTGTTTT	53	hsa-mir-548t	1
CAACGAACGTTCACAGACAT	MCF2	HGLibA_35864	CAACGAACGTTCACAGACAT	53	MCF2	1
CCGCCAGCTCGACGATGTCC	MRFAP1	HGLibA_37116	CCGCCAGCTCGACGATGTCC	53	MRFAP1	1
ACAGCAATGTTGCACTTGTC	NCOA7	HGLibA_38642	ACAGCAATGTTGCACTTGTC	53	NCOA7	1
TGTACTCCGCTTACATTCGC	TTC32	HGLibA_59402	TGTACTCCGCTTACATTCGC	53	TTC32	1
CGATGTGTAGTGCCTTCCAT	XRCC2	HGLibA_61875	CGATGTGTAGTGCCTTCCAT	53	XRCC2	1
GTCGCATCCGTGCTGACCTG	ATP13A5	HGLibA_03579	GTCGCATCCGTGCTGACCTG	52	ATP13A5	2
GCAGTGTTGCATCGCCGACC	ACVRL1	HGLibA_00700	GCAGTGTTGCATCGCCGACC	52	ACVRL1	1
CGACGCGACATCCAACCGAG	ADM	HGLibA_00991	CGACGCGACATCCAACCGAG	52	ADM	1
CTCAGTTCATGTGGATCATC	GABARAPL2	HGLibA_18339	CTCAGTTCATGTGGATCATC	52	GABARAPL2	1
CTATGACCACACAACCATCC	HBEGF	HGLibA_20922	CTATGACCACACAACCATCC	52	HBEGF	1
GCCGCGGAGCGATTGCATGC	POU3F1	HGLibA_45054	GCCGCGGAGCGATTGCATGC	52	POU3F1	1
CAATTTCGAAGTCAACGTCG	UQCR10	HGLibA_60391	CAATTTCGAAGTCAACGTCG	52	UQCR10	1
CGTGAACATTTACGAGTTTG	VWA5A	HGLibA_61195	CGTGAACATTTACGAGTTTG	52	VWA5A	1
TGAAGACATGCTGAGCTACA	TSPY1	HGLibA_59252	TGAAGACATGCTGAGCTACA	51	TSPY1	2
CCTCGCATCAATAGTGCCAC	CLNK	HGLibA_10088	CCTCGCATCAATAGTGCCAC	51	CLNK	1
ACGCTCAGCACCCGCTATGC	NonTargetingControlGuideForHuman_0211	HGLibA_64594	ACGCTCAGCACCCGCTATGC	51	NonTargetingControlGuideForHuman_0211	1
GTTGATGGCACAGGTAGACT	PIGU	HGLibA_43878	GTTGATGGCACAGGTAGACT	51	PIGU	1
GTCCTTGCAGGTACTATGCC	POLA2	HGLibA_44774	GTCCTTGCAGGTACTATGCC	51	POLA2	1
CTCACCTGGGGCGAACCTCT	PRAMEF7	HGLibA_45615	CTCACCTGGGGCGAACCTCT	51	PRAMEF7	1
GTACTTTCCTGCGGGAGGAC	hsa-mir-1233-1	HGLibA_22375	GTACTTTCCTGCGGGAGGAC	51
ACACTTACCATTCTGGCTGC	CCT4	HGLibA_08202	ACACTTACCATTCTGGCTGC	50	CCT4	2
AGCGATGAGGGACTGGCATC	hsa-mir-3180-4	HGLibA_23868	AGCGATGAGGGACTGGCATC	50	hsa-mir-3180-4	2
ACCAACAGATTGCCGTTAGC	SATB2	HGLibA_50067	ACCAACAGATTGCCGTTAGC	50	SATB2	2
TGCTGAACACCTTCCCGCAC	ZNF541	HGLibA_63480	TGCTGAACACCTTCCCGCAC	50	ZNF541	2
GGCTCCGAGCCATCGAAGTC	ADCYAP1	HGLibA_00934	GGCTCCGAGCCATCGAAGTC	50	ADCYAP1	1
GACCTGCCTACAGACCCGCC	CSF2	HGLibA_11326	GACCTGCCTACAGACCCGCC	50	CSF2	1
CAGAAGAGGTGGCTCGTCTC	ELK4	HGLibA_14918	CAGAAGAGGTGGCTCGTCTC	50	ELK4	1
GCAAGCGGCGAGCTCTGCGT	FLJ22184	HGLibA_17620	GCAAGCGGCGAGCTCTGCGT	50	FLJ22184	1
TCCGTGCTTCATAGTCATAA	FYN	HGLibA_18253	TCCGTGCTTCATAGTCATAA	50	FYN	1
ATAGATCAGAGTTTTATCAG	hsa-mir-555	HGLibA_27189	ATAGATCAGAGTTTTATCAG	50	hsa-mir-555	1
TGGGGACCCTCCCTGAACCA	hsa-mir-659	HGLibA_28023	TGGGGACCCTCCCTGAACCA	50	hsa-mir-659	1
GAAGGCCGCCCTCGAGTACG	KNDC1	HGLibA_32627	GAAGGCCGCCCTCGAGTACG	50	KNDC1	1
CTGTGCCTCCCACTGCATCG	OR10G9	HGLibA_40792	CTGTGCCTCCCACTGCATCG	50	OR10G9	1
TGTCCCTAGTACGCACCAGA	RAB15	HGLibA_47106	TGTCCCTAGTACGCACCAGA	50	RAB15	1
TTGTCTTTAGGGCGAGCGTT	TSC2	HGLibA_59102	TTGTCTTTAGGGCGAGCGTT	50	TSC2	1
CGAACTAAAGAGCGTGAAGT	LRAT	HGLibA_34418	CGAACTAAAGAGCGTGAAGT	49	LRAT	2
ACTTACTTTGTCCAACGCAT	CT45A1	HGLibA_11499	ACTTACTTTGTCCAACGCAT	49	CT45A1	1
CGCTCTGCAGAGGCTCTAAC	hsa-mir-6822	HGLibA_28521	CGCTCTGCAGAGGCTCTAAC	49	hsa-mir-6822	1
ACCCGAAAGGTCTTTGTATA	RBM24	HGLibA_47803	ACCCGAAAGGTCTTTGTATA	49	RBM24	1
AGATTTACTACATCCGTCCT	RPS27L	HGLibA_49415	AGATTTACTACATCCGTCCT	49	RPS27L	1
TGTCGTCGTCCCGCACATCT	SULT2B1	HGLibA_55049	TGTCGTCGTCCCGCACATCT	49	SULT2B1	1
GAATTGCCCGCATATCTCTC	WDR33	HGLibA_61354	GAATTGCCCGCATATCTCTC	49
TCAGTGCTTCAACCGTTCCC	NOVA1	HGLibA_39652	TCAGTGCTTCAACCGTTCCC	48	NOVA1	2
GGCACCTTCTGGTACACAAC	E2F5	HGLibA_14320	GGCACCTTCTGGTACACAAC	48	E2F5	1
TACAAAGCAATCCACCGCAT	GJA10	HGLibA_19140	TACAAAGCAATCCACCGCAT	48	GJA10	1
TATGTTTGAAACGACCATCC	LIFR	HGLibA_33764	TATGTTTGAAACGACCATCC	48	LIFR	1
TAGCTACCATCTCTCCAGTA	MELK	HGLibA_36167	TAGCTACCATCTCTCCAGTA	48	MELK	1
CAACTATTACGACATGAACG	MIF	HGLibA_36549	CAACTATTACGACATGAACG	48	MIF	1
CGAACTTAATCCCGTGGCAA	NonTargetingControlGuideForHuman_0094	HGLibA_64477	CGAACTTAATCCCGTGGCAA	48	NonTargetingControlGuideForHuman_0094	1
CTCATTCTGATAAGATGATC	PHF3	HGLibA_43666	CTCATTCTGATAAGATGATC	48	PHF3	1
ATCCGACCAGCCCATGTGCG	TRIM55	HGLibA_58835	ATCCGACCAGCCCATGTGCG	48	TRIM55	1
TGCAGATCCTGGTTCTGAAG	hsa-mir-4513	HGLibA_25548	TGCAGATCCTGGTTCTGAAG	47	hsa-mir-4513	2
GGCCACGGTTCAGGAAGTCC	SMIM22	HGLibA_53039	GGCCACGGTTCAGGAAGTCC	47	SMIM22	2
TCTCCCGGGAGAACGCGCTG	AKIP1	HGLibA_01454	TCTCCCGGGAGAACGCGCTG	47	AKIP1	1
TGCGCATGATCATATACAGT	CARS2	HGLibA_07261	TGCGCATGATCATATACAGT	47	CARS2	1
GACCTCGCAGTACCACGTCC	EPS8L2	HGLibA_15380	GACCTCGCAGTACCACGTCC	47	EPS8L2	1
CATAGCAGGACACAAAATAT	hsa-mir-4756	HGLibA_26174	CATAGCAGGACACAAAATAT	47	hsa-mir-4756	1
TCCTAAGATTTTCATCACCT	hsa-mir-544a	HGLibA_26877	TCCTAAGATTTTCATCACCT	47	hsa-mir-544a	1
CACAGCCCTGCAGTTATCAC	hsa-mir-5685	HGLibA_27315	CACAGCCCTGCAGTTATCAC	47	hsa-mir-5685	1
TGACCGCCTCAATGTTGAGG	KRT35	HGLibA_32777	TGACCGCCTCAATGTTGAGG	47	KRT35	1
GCTTACCGTGGACGCCTACC	KSR2	HGLibA_33154	GCTTACCGTGGACGCCTACC	47	KSR2	1
GATTTGAATCACTATCGCAT	PPP1R7	HGLibA_45409	GATTTGAATCACTATCGCAT	47	PPP1R7	1
GCTTACCTTAGGTCCATAGA	TARS2	HGLibA_55637	GCTTACCTTAGGTCCATAGA	47	TARS2	1
TGACCGTCTCCACACTCCGT	WDR38	HGLibA_61369	TGACCGTCTCCACACTCCGT	47	WDR38	1
CAGTCTCCCCACCTAGAATG	hsa-mir-4513	HGLibA_25550	CAGTCTCCCCACCTAGAATG	47
TCCCCACCGACTCGTCCACA	ANKH	HGLibA_01960	TCCCCACCGACTCGTCCACA	46	ANKH	2
GACCCTCATCGAGGTCAGCG	ADPRHL1	HGLibA_01027	GACCCTCATCGAGGTCAGCG	46	ADPRHL1	1
AGCTGTATTACCTGATCGCT	BRWD3	HGLibA_04858	AGCTGTATTACCTGATCGCT	46	BRWD3	1
CGCCGGATCTCCAGCACGCA	C17orf50	HGLibA_05541	CGCCGGATCTCCAGCACGCA	46	C17orf50	1
CGTACTTGCGCTCCGACGCC	CENPB	HGLibA_09040	CGTACTTGCGCTCCGACGCC	46	CENPB	1
AATCCTATGCTTGGTAATAC	CLEC7A	HGLibA_10005	AATCCTATGCTTGGTAATAC	46	CLEC7A	1
CATCATACAAGATGATGCCG	CXorf22	HGLibA_11906	CATCATACAAGATGATGCCG	46	CXorf22	1
TCTCTTGCTACAGCACGTTT	HNRNPA2B1	HGLibA_21797	TCTCTTGCTACAGCACGTTT	46	HNRNPA2B1	1
AGTAGTCAGCAAGTCCAGCG	MRM1	HGLibA_37149	AGTAGTCAGCAAGTCCAGCG	46	MRM1	1
CGACAACGTGCAGGTGTATC	NonTargetingControlGuideForHuman_0244	HGLibA_64627	CGACAACGTGCAGGTGTATC	46	NonTargetingControlGuideForHuman_0244	1
AACTACAGTCCCTCATATGT	OR2B3	HGLibA_41058	AACTACAGTCCCTCATATGT	46	OR2B3	1
GCTCAGGTCCACAGCGTCGC	OXA1L	HGLibA_42098	GCTCAGGTCCACAGCGTCGC	46	OXA1L	1
GACTGCCACGGCGTACTCTG	TAB3	HGLibA_55436	GACTGCCACGGCGTACTCTG	46	TAB3	1
GCCGCAAGCTTTGACACTCT	TPR	HGLibA_58461	GCCGCAAGCTTTGACACTCT	46	TPR	1
TCACCTGCCCTGAACATTAC	TRIM59	HGLibA_58844	TCACCTGCCCTGAACATTAC	46	TRIM59	1
TGTCTCCTATCCACGTTCTC	ZNF121	HGLibA_62740	TGTCTCCTATCCACGTTCTC	46	ZNF121	1
TGGTCACCATTCTAAGGCCA	hsa-mir-6895	HGLibA_28817	TGGTCACCATTCTAAGGCCA	45	hsa-mir-6895	3
GCTTATTTGTGTACAATCAC	RPP40	HGLibA_49329	GCTTATTTGTGTACAATCAC	45	RPP40	2
ATGTTTCAGGCACTACACGC	TMEM183A	HGLibA_57393	ATGTTTCAGGCACTACACGC	45	TMEM183A	2
TCGTGGCTCTTCCAGCCGCG	CD8A	HGLibA_08471	TCGTGGCTCTTCCAGCCGCG	45	CD8A	1
GCAGCAGGGTACTCAGATAC	CST1	HGLibA_11444	GCAGCAGGGTACTCAGATAC	45	CST1	1
TTTCTGCAGGTATCGGCGCA	DNAJB2	HGLibA_13536	TTTCTGCAGGTATCGGCGCA	45	DNAJB2	1
CCGGTCTAGGTAGACTCCTA	FUT11	HGLibA_18185	CCGGTCTAGGTAGACTCCTA	45	FUT11	1
TGATATCGCACTTGTGTCCG	IL4	HGLibA_30453	TGATATCGCACTTGTGTCCG	45	IL4	1
GGCCCTAACGCTGCGCTTTG	KTI12	HGLibA_33158	GGCCCTAACGCTGCGCTTTG	45	KTI12	1
CGACCGGATGCACCCGTTTC	PLD2	HGLibA_44325	CGACCGGATGCACCCGTTTC	45	PLD2	1
TCTTCTCGTACGCCACGTCC	PPP1R13L	HGLibA_45319	TCTTCTCGTACGCCACGTCC	45	PPP1R13L	1
TGTCCACAAACCGCACACGC	GPKOW	HGLibA_19812	TGTCCACAAACCGCACACGC	45
AGAGACTCCCAAGCAGACAC	IL9R_X	HGLibA_30489	AGAGACTCCCAAGCAGACAC	44	IL9R_X	2
CCACACCTTGTACTTCCGTG	NOC4L	HGLibA_39530	CCACACCTTGTACTTCCGTG	44	NOC4L	2
CTTTGCCCTTTACCACTCGA	CBX1	HGLibA_07446	CTTTGCCCTTTACCACTCGA	44	CBX1	1
TTCACCCCTGACCTTCTACT	CLCA4	HGLibA_09811	TTCACCCCTGACCTTCTACT	44	CLCA4	1
AAGAAAGCAACAATATTGTC	CTAGE15	HGLibA_11570	AAGAAAGCAACAATATTGTC	44	CTAGE15	1
ACATCCTTGCCTCCTTTCCT	CXorf40A	HGLibA_11924	ACATCCTTGCCTCCTTTCCT	44	CXorf40A	1
CTCCGGAGAAGTTAGACCCT	DPH3P1	HGLibA_13846	CTCCGGAGAAGTTAGACCCT	44	DPH3P1	1
GCCCGTGTAGTGTTCGATGT	FITM2	HGLibA_17543	GCCCGTGTAGTGTTCGATGT	44	FITM2	1
ACTTACGGCTTGTACTTCTG	OR5M3	HGLibA_41626	ACTTACGGCTTGTACTTCTG	44	OR5M3	1
TGCAGCACCAAGTCAGTTGC	RAD54B	HGLibA_47387	TGCAGCACCAAGTCAGTTGC	44	RAD54B	1
ACTTCATCTTCGACTTGGGC	TMEM136	HGLibA_57241	ACTTCATCTTCGACTTGGGC	44	TMEM136	1
CCATATCCGGCTCGAGGTGC	TMEM86B	HGLibA_57815	CCATATCCGGCTCGAGGTGC	44	TMEM86B	1
CCTCATGACACACGAGACTC	TPCN2	HGLibA_58395	CCTCATGACACACGAGACTC	44	TPCN2	1
TAAGATCATGTTCTCCGGGC	C14orf178	HGLibA_05346	TAAGATCATGTTCTCCGGGC	43	C14orf178	2
CGTGGTCGCCACCAAAATTG	CCDC13	HGLibA_07588	CGTGGTCGCCACCAAAATTG	43	CCDC13	2
GCCGGCCGTAACTCTTTCCC	SRRM5	HGLibA_54341	GCCGGCCGTAACTCTTTCCC	43	SRRM5	2
CTACTTTGCACACCATCCCG	DGKK	HGLibA_13079	CTACTTTGCACACCATCCCG	43	DGKK	1
TCTCCCTGATACGCCTTGCA	MTMR7	HGLibA_37724	TCTCCCTGATACGCCTTGCA	43	MTMR7	1
ATGTCTAGACCTAATCGTTT	NonTargetingControlGuideForHuman_0420	HGLibA_64803	ATGTCTAGACCTAATCGTTT	43	NonTargetingControlGuideForHuman_0420	1
CTCACCGGGGTAGAAGTCTT	NOVA2	HGLibA_39656	CTCACCGGGGTAGAAGTCTT	43	NOVA2	1
AGCCTATCCTACAGACAGCC	SLC44A5	HGLibA_52457	AGCCTATCCTACAGACAGCC	43	SLC44A5	1
TTTAGCCTGAACACACCACC	TDRD3	HGLibA_56194	TTTAGCCTGAACACACCACC	43	TDRD3	1
CAGCAGGGCGATGTCCGCCC	TPSD1	HGLibA_58487	CAGCAGGGCGATGTCCGCCC	43	TPSD1	1
TGTACAACTGGTCCAAGTTC	TYRO3	HGLibA_59756	TGTACAACTGGTCCAAGTTC	43	TYRO3	1
ATCGCGGGTCGCACCTTACA	ZNF460	HGLibA_63322	ATCGCGGGTCGCACCTTACA	43	ZNF460	1
GCCGAACCATCACTTCTGCG	SLC41A3	HGLibA_52432	GCCGAACCATCACTTCTGCG	42	SLC41A3	2
GTAACCGTGTATAGATGAGC	CD86	HGLibA_08467	GTAACCGTGTATAGATGAGC	42	CD86	1
CTGAAAGACTTCGACCGTGA	CDCA8	HGLibA_08619	CTGAAAGACTTCGACCGTGA	42	CDCA8	1
CCCAGCCACGTTTAACACGT	CDH12	HGLibA_08638	CCCAGCCACGTTTAACACGT	42	CDH12	1
CTGCGTGGCCTATGCAAGAA	CPSF4	HGLibA_11007	CTGCGTGGCCTATGCAAGAA	42	CPSF4	1
ACCGTTGGTTGATCCCTACT	CTTNBP2NL	HGLibA_11745	ACCGTTGGTTGATCCCTACT	42	CTTNBP2NL	1
AGGTGGATGTTGTGCGTAGC	CUX1	HGLibA_11803	AGGTGGATGTTGTGCGTAGC	42	CUX1	1
GCTTACCTCACAATCCCGCT	DND1	HGLibA_13670	GCTTACCTCACAATCCCGCT	42	DND1	1
GTCTTGCTGTATGATGAACA	IFT172	HGLibA_30038	GTCTTGCTGTATGATGAACA	42	IFT172	1
ATTTATACCCGCCTCTTCAT	MTRNR2L5	HGLibA_37771	ATTTATACCCGCCTCTTCAT	42	MTRNR2L5	1
GCAACTCCTGTGATGACATA	NUP62CL	HGLibA_40353	GCAACTCCTGTGATGACATA	42	NUP62CL	1
AGAGGTGAGCGAGAGCACGA	RABEP2	HGLibA_47292	AGAGGTGAGCGAGAGCACGA	42	RABEP2	1
GCAGGCTTGCGAGCTGCATT	SDHA	HGLibA_50422	GCAGGCTTGCGAGCTGCATT	42	SDHA	1
AATATGACTTTACGTCCAGT	TECR	HGLibA_56236	AATATGACTTTACGTCCAGT	42	TECR	1
TCTGTCTCCTTATTTAAATG	TIMM23	HGLibA_56801	TCTGTCTCCTTATTTAAATG	42	TIMM23	1
CCGAATGGTCAACCTTCAAG	TREM1	HGLibA_58642	CCGAATGGTCAACCTTCAAG	42	TREM1	1
ACTGTTTACACTTCCCACCC	ZNF155	HGLibA_62791	ACTGTTTACACTTCCCACCC	42	ZNF155	1
TACACATGAGAGAATCATAC	ZNF626	HGLibA_63709	TACACATGAGAGAATCATAC	42	ZNF626	1
TTCTGTGGCGGCCAGCACGT	SLC22A18	HGLibA_51849	TTCTGTGGCGGCCAGCACGT	41	SLC22A18	2
CGGGAGTCGCAATGTGTGCT	TSPAN2	HGLibA_59211	CGGGAGTCGCAATGTGTGCT	41	TSPAN2	2
GACCAATATACCCATAGCCT	ZZZ3	HGLibA_64383	GACCAATATACCCATAGCCT	41	ZZZ3	2
ATATTGACCGCACCGTGTCC	ARHGAP17	HGLibA_02713	ATATTGACCGCACCGTGTCC	41	ARHGAP17	1
TTCCCGAATGTATGAATTCG	CHST4	HGLibA_09637	TTCCCGAATGTATGAATTCG	41	CHST4	1
CAACGCTTACCCTTGGGCCT	COL1A1	HGLibA_10529	CAACGCTTACCCTTGGGCCT	41	COL1A1	1
TGTTAACTATATTGATCCAA	ELAVL4	HGLibA_14889	TGTTAACTATATTGATCCAA	41	ELAVL4	1
AGATTTCCGGGACTGTTTAG	HDGFRP3	HGLibA_21047	AGATTTCCGGGACTGTTTAG	41	HDGFRP3	1
TCAACACCCTCTTCTTGAAC	IFITM1	HGLibA_29927	TCAACACCCTCTTCTTGAAC	41	IFITM1	1
AGTCCCTGGCCGGCTGTACG	IGDCC4	HGLibA_30076	AGTCCCTGGCCGGCTGTACG	41	IGDCC4	1
CGCCCTCAATAACGTCTTCC	JOSD1	HGLibA_31262	CGCCCTCAATAACGTCTTCC	41	JOSD1	1
GCCATGCGTACCCGATTCGC	KAZALD1	HGLibA_31374	GCCATGCGTACCCGATTCGC	41	KAZALD1	1
GGGCTACTTCATTTGTTGCG	MPC1	HGLibA_36990	GGGCTACTTCATTTGTTGCG	41	MPC1	1
CGTACTCACGTCCAGGATGA	NECAB2	HGLibA_38874	CGTACTCACGTCCAGGATGA	41	NECAB2	1
TTATGTAGATGATTCGCCAC	NUP210L	HGLibA_40329	TTATGTAGATGATTCGCCAC	41	NUP210L	1
CACGGAGTCCCTTCTTCGTA	PDCD10	HGLibA_43007	CACGGAGTCCCTTCTTCGTA	41	PDCD10	1
TGTGACCATGAACCAGTCTA	PLAC1	HGLibA_44222	TGTGACCATGAACCAGTCTA	41	PLAC1	1
TGCTTAACTGTTCGAAACTA	RNF17	HGLibA_48858	TGCTTAACTGTTCGAAACTA	41	RNF17	1
GCAGTACTTCCAGGCGCGAC	SLC29A2	HGLibA_52130	GCAGTACTTCCAGGCGCGAC	41	SLC29A2	1
GTACCTGTCTGTAGGTATCC	TBC1D22B	HGLibA_55795	GTACCTGTCTGTAGGTATCC	41	TBC1D22B	1
ACTTACTCCCAGGGAAGCGC	TEX38	HGLibA_56398	ACTTACTCCCAGGGAAGCGC	41	TEX38	1
CCTGGGCAGAGACTACTAAG	UTP18	HGLibA_60732	CCTGGGCAGAGACTACTAAG	41	UTP18	1
CCGTAGGGGCCGCTCCTCGC	ZFP28	HGLibA_62483	CCGTAGGGGCCGCTCCTCGC	41	ZFP28	1
GTGTTCTTGCATGTACTCGA	ZNF844	HGLibA_64149	GTGTTCTTGCATGTACTCGA	41	ZNF844	1
TACAGCTCTGTTGTCACGCA	ZSCAN32	HGLibA_64311	TACAGCTCTGTTGTCACGCA	41	ZSCAN32	1
GCGCGACCAGGCCAGCGATG	hsa-mir-3180-4	HGLibA_23866	GCGCGACCAGGCCAGCGATG	41
CGCATAGGCCCAATCATTTC	GAGE1	HGLibA_18430	CGCATAGGCCCAATCATTTC	40	GAGE1	2
GTTCGCCACAAACAGTATCA	CLRN3	HGLibA_10128	GTTCGCCACAAACAGTATCA	40	CLRN3	1
TTGGTTACCGCCACGAAGAC	CYP17A1	HGLibA_12061	TTGGTTACCGCCACGAAGAC	40	CYP17A1	1
ACTTACTCTGTGACGTACAT	ERN2	HGLibA_15515	ACTTACTCTGTGACGTACAT	40	ERN2	1
ATTCTTTACCATTAGCCATA	GDI2	HGLibA_18885	ATTCTTTACCATTAGCCATA	40	GDI2	1
AAGAGACACTCACCTCCTCC	hsa-mir-1281	HGLibA_22635	AAGAGACACTCACCTCCTCC	40	hsa-mir-1281	1
CAGTTAAACTTGGCTATACT	hsa-mir-4720	HGLibA_26033	CAGTTAAACTTGGCTATACT	40	hsa-mir-4720	1
TATTGTAAGTTACGATTTAC	KIAA0391	HGLibA_31921	TATTGTAAGTTACGATTTAC	40	KIAA0391	1
GCAGTAGCAAGTCGTCGTCG	NAGPA	HGLibA_38359	GCAGTAGCAAGTCGTCGTCG	40	NAGPA	1
TTTGTTCACGACCCTCAACT	PARK2	HGLibA_42485	TTTGTTCACGACCCTCAACT	40	PARK2	1
CGTGGAGGACGTGTACACCG	SUV39H1	HGLibA_55147	CGTGGAGGACGTGTACACCG	40	SUV39H1	1
ATTAGCTGCAAGGCGGATCA	TANGO6	HGLibA_55589	ATTAGCTGCAAGGCGGATCA	40	TANGO6	1
CCGACAGGTCCACGTAGCGC	TLR9	HGLibA_56956	CCGACAGGTCCACGTAGCGC	40	TLR9	1
CGTCGTCACTGTGCAGCGTC	AIP	HGLibA_01362	CGTCGTCACTGTGCAGCGTC	39	AIP	2
ACGTTCCCTTCGACATCTTC	CSDE1	HGLibA_11314	ACGTTCCCTTCGACATCTTC	39	CSDE1	2
CCGTCGCCCTGTTCAGATGA	TTC5	HGLibA_59435	CCGTCGCCCTGTTCAGATGA	39	TTC5	2
GAGCGTTCCTCCTTGTTATC	CFTR	HGLibA_09293	GAGCGTTCCTCCTTGTTATC	39	CFTR	1
CCTTCTCCAGTGCGTCATTC	DAPL1	HGLibA_12330	CCTTCTCCAGTGCGTCATTC	39	DAPL1	1
TGAGCACGAATGTGAAGTTC	DENND1A	HGLibA_12930	TGAGCACGAATGTGAAGTTC	39	DENND1A	1
AGCCGCGAACAATGCCACCT	EFNB1	HGLibA_14597	AGCCGCGAACAATGCCACCT	39	EFNB1	1
CTCCCTACTGACCACGAAGT	GCNT1	HGLibA_18810	CTCCCTACTGACCACGAAGT	39	GCNT1	1
ATAGCCAATAGAGGGTGCAC	hsa-mir-3622a	HGLibA_24174	ATAGCCAATAGAGGGTGCAC	39	hsa-mir-3622a	1
GATCTTTAATGTCTCAGCAC	hsa-mir-8058	HGLibA_29126	GATCTTTAATGTCTCAGCAC	39	hsa-mir-8058	1
CTTGCTGATCAAGTCCTATT	IFNK	HGLibA_30004	CTTGCTGATCAAGTCCTATT	39	IFNK	1
GCCCACTGACATGATAACGA	PIRT	HGLibA_44020	GCCCACTGACATGATAACGA	39	PIRT	1
TCGAACACCTTGTACCAGCT	PQBP1	HGLibA_45535	TCGAACACCTTGTACCAGCT	39	PQBP1	1
CTCGAGTTGCCATGCCCACC	RELT	HGLibA_48116	CTCGAGTTGCCATGCCCACC	39	RELT	1
TCCAAATGTCAGCCGCTTAG	SLC30A8	HGLibA_52207	TCCAAATGTCAGCCGCTTAG	39	SLC30A8	1
CTCCCCATTGATGCTTGAAG	SPANXN1	HGLibA_53691	CTCCCCATTGATGCTTGAAG	39	SPANXN1	1
GTCGCTCGTGAACGAGTCCG	TCF7	HGLibA_56078	GTCGCTCGTGAACGAGTCCG	39	TCF7	1
GATGACATCCACTACGATGT	THSD1	HGLibA_56689	GATGACATCCACTACGATGT	39	THSD1	1
TTTCATAATCCACTGATATC	ACYP1	HGLibA_00711	TTTCATAATCCACTGATATC	38	ACYP1	3
TGACTGTCGCATTCAGCATC	ICAM3	HGLibA_29787	TGACTGTCGCATTCAGCATC	38	ICAM3	2
TCAGGTCCTTGATCACGCGC	TNFAIP8L2	HGLibA_58011	TCAGGTCCTTGATCACGCGC	38	TNFAIP8L2	2
CCAAATCTTGCGGATGTCCA	ANKRD26	HGLibA_02048	CCAAATCTTGCGGATGTCCA	38	ANKRD26	1
TTTATGCCTGGCCACCTACC	ANKRD55	HGLibA_02126	TTTATGCCTGGCCACCTACC	38	ANKRD55	1
TCTCTGTCACTGATATCCTC	BTBD8	HGLibA_04924	TCTCTGTCACTGATATCCTC	38	BTBD8	1
CGAGCACCACTCGTCCCCGA	GTF3C5	HGLibA_20591	CGAGCACCACTCGTCCCCGA	38	GTF3C5	1
CATTTGTGATTGATGGGAGG	hsa-mir-4477a	HGLibA_25374	CATTTGTGATTGATGGGAGG	38	hsa-mir-4477a	1
TACAATGTAAGTGCTCATTT	hsa-mir-5696	HGLibA_27372	TACAATGTAAGTGCTCATTT	38	hsa-mir-5696	1
CATGGTGGAGACCAACCACC	KRT37	HGLibA_32783	CATGGTGGAGACCAACCACC	38	KRT37	1
TCCGACAAATCCTGCCGCTG	KRTAP3-2	HGLibA_33031	TCCGACAAATCCTGCCGCTG	38	KRTAP3-2	1
CGTGTATACTACCAATATCC	LPXN	HGLibA_34417	CGTGTATACTACCAATATCC	38	LPXN	1
CGCACCCAACAAAGATGCGG	LRRC38	HGLibA_34627	CGCACCCAACAAAGATGCGG	38	LRRC38	1
CTTAGTGGGCATGTCCTACC	OR5P3	HGLibA_41636	CTTAGTGGGCATGTCCTACC	38	OR5P3	1
CGATTCTACACTAACTGTAC	RNF139	HGLibA_48805	CGATTCTACACTAACTGTAC	38	RNF139	1
TGACCCAGTTCGACAACGTG	SMARCC2	HGLibA_52914	TGACCCAGTTCGACAACGTG	38	SMARCC2	1
CCTGCACGTCCGCGAACACC	SSTR5	HGLibA_54475	CCTGCACGTCCGCGAACACC	38	SSTR5	1
GTACGTCCCAGACCCATTGA	GPNMB	HGLibA_19834	GTACGTCCCAGACCCATTGA	38
AAGGAGGCTGGGAAGGCAAA	hsa-mir-204	HGLibA_23229	AAGGAGGCTGGGAAGGCAAA	38
CACTCCTTCGAGACCTTCTG	PCSK1	HGLibA_42956	CACTCCTTCGAGACCTTCTG	37	PCSK1	2
CCTGGACCTCGTCGTCCTTG	RPL26L1	HGLibA_49204	CCTGGACCTCGTCGTCCTTG	37	RPL26L1	2
CAGGTCTTAGTACCCTGCAA	ANKRD27	HGLibA_02051	CAGGTCTTAGTACCCTGCAA	37	ANKRD27	1
TGTGAGTTCACCTGCATCCC	ATXN2	HGLibA_03837	TGTGAGTTCACCTGCATCCC	37	ATXN2	1
TACTTACATGAGGAGCCGTG	CREB3L2	HGLibA_11095	TACTTACATGAGGAGCCGTG	37	CREB3L2	1
TTACACCATGCTTGTCCGCC	EIF3E	HGLibA_14777	TTACACCATGCTTGTCCGCC	37	EIF3E	1
TGGGGCCTCCCTTCACTTCC	hsa-mir-4669	HGLibA_25846	TGGGGCCTCCCTTCACTTCC	37	hsa-mir-4669	1
AGCCCACCGCTGCAGGCAGA	hsa-mir-6511a-4	HGLibA_27962	AGCCCACCGCTGCAGGCAGA	37	hsa-mir-6511a-4	1
ATCCTCTCTTCCCTCCTCCC	hsa-mir-7111	HGLibA_28863	ATCCTCTCTTCCCTCCTCCC	37	hsa-mir-7111	1
TTCTGCAGATCGATAATGCC	KRT25	HGLibA_32747	TTCTGCAGATCGATAATGCC	37	KRT25	1
AGACGCTATGCGCTCAGCGC	NEFH	HGLibA_38906	AGACGCTATGCGCTCAGCGC	37	NEFH	1
ACAACCGAGCCATGGAGACG	OR2V2	HGLibA_41188	ACAACCGAGCCATGGAGACG	37	OR2V2	1
TCTTATAGATGATGATTGGC	PATL1	HGLibA_42571	TCTTATAGATGATGATTGGC	37	PATL1	1
TCATAGGACTGCTCTACATC	POTEE	HGLibA_45016	TCATAGGACTGCTCTACATC	37	POTEE	1
TTCAGCTTGACATCTAAGAC	RNF7	HGLibA_48986	TTCAGCTTGACATCTAAGAC	37	RNF7	1
TACTCACCTGCTCGAAGGAC	RPL7A	HGLibA_49283	TACTCACCTGCTCGAAGGAC	37	RPL7A	1
CAAGGTGATAATGTGCCCCG	SEMA3E	HGLibA_50618	CAAGGTGATAATGTGCCCCG	37	SEMA3E	1
CCGCACAACGACTCGGCCAC	SHH	HGLibA_51317	CCGCACAACGACTCGGCCAC	37	SHH	1
TGCTCCCTCTCCATTAAGTA	SNAP91	HGLibA_53175	TGCTCCCTCTCCATTAAGTA	37	SNAP91	1
AGCCGCCCCCAGCCCCGTTA	SSBP4	HGLibA_54410	AGCCGCCCCCAGCCCCGTTA	37	SSBP4	1
TGTCCCACTAGCTGCTAAGC	TAF7L	HGLibA_55543	TGTCCCACTAGCTGCTAAGC	37	TAF7L	1
TAGGGCAAATGTAGTGCTTC	TRIM60	HGLibA_58852	TAGGGCAAATGTAGTGCTTC	37	TRIM60	1
TTCTCTTGCAGACGCCGACT	VWCE	HGLibA_61216	TTCTCTTGCAGACGCCGACT	37	VWCE	1
CACGTAGACATATCCCGCCG	DPPA5	HGLibA_13895	CACGTAGACATATCCCGCCG	36	DPPA5	2
CATGTGACGGGACCCGTGTG	THSD7B	HGLibA_56698	CATGTGACGGGACCCGTGTG	36	THSD7B	2
TGTTTGCCGTCCATCTATTC	AADACL2	HGLibA_00032	TGTTTGCCGTCCATCTATTC	36	AADACL2	1
CCTGTGATTCGACTGACGTT	APOBEC3D	HGLibA_02485	CCTGTGATTCGACTGACGTT	36	APOBEC3D	1
TGCTACTGGTGGACACGTAC	ARHGEF37	HGLibA_02855	TGCTACTGGTGGACACGTAC	36	ARHGEF37	1
CCGGCCGGCCCACGTGGTAG	BLVRB	HGLibA_04577	CCGGCCGGCCCACGTGGTAG	36	BLVRB	1
GACTTGAAGGAGATTCGAGT	C17orf77	HGLibA_05577	GACTTGAAGGAGATTCGAGT	36	C17orf77	1
GTGACGCGAACACCTTGTTG	DCAF12L2	HGLibA_12424	GTGACGCGAACACCTTGTTG	36	DCAF12L2	1
TACGCTGCCGAAATCGTAAA	DEFB119	HGLibA_12866	TACGCTGCCGAAATCGTAAA	36	DEFB119	1
CACCGCGTCACAGCGCACGA	EPS8L1	HGLibA_15377	CACCGCGTCACAGCGCACGA	36	EPS8L1	1
GACTGTCGATCCCGCTGTCC	FGD3	HGLibA_17347	GACTGTCGATCCCGCTGTCC	36	FGD3	1
CTGGTTTCTTGGGCAAATCG	FRMD4B	HGLibA_18017	CTGGTTTCTTGGGCAAATCG	36	FRMD4B	1
TGTTTGCTTTGTTCGTGCCA	HIST1H3I	HGLibA_21480	TGTTTGCTTTGTTCGTGCCA	36	HIST1H3I	1
CTGTCCCTTCCGAACAGCTA	HMOX2	HGLibA_21750	CTGTCCCTTCCGAACAGCTA	36	HMOX2	1
CGCCAGGTATGCGTTCACCG	MFSD12	HGLibA_36378	CGCCAGGTATGCGTTCACCG	36	MFSD12	1
CAGCCCCATCAGCGTGATTC	NPRL3	HGLibA_39808	CAGCCCCATCAGCGTGATTC	36	NPRL3	1
GCAGGCCACCATCCGCGACG	PTPRCAP	HGLibA_46780	GCAGGCCACCATCCGCGACG	36	PTPRCAP	1
CGGATGCGACCCTCCCAGAC	RAP1GAP2	HGLibA_47517	CGGATGCGACCCTCCCAGAC	36	RAP1GAP2	1
AGCGGCCTCCTGACGAGCAG	TCEB2	HGLibA_56025	AGCGGCCTCCTGACGAGCAG	36	TCEB2	1
CTCACTTACTATAGGTCGGA	TSR1	HGLibA_59281	CTCACTTACTATAGGTCGGA	36	TSR1	1
TCAGAAATCGTATACATAGA	CDK17	HGLibA_08747	TCAGAAATCGTATACATAGA	35	CDK17	2
CTCCATGAGCGAAGACGCGT	MIS18A	HGLibA_36594	CTCCATGAGCGAAGACGCGT	35	MIS18A	2
TGGCCCAGACGATGCCGCCG	BLOC1S2	HGLibA_04559	TGGCCCAGACGATGCCGCCG	35	BLOC1S2	1
TGCACCCATCTCCTTCGACC	C9orf91	HGLibA_06777	TGCACCCATCTCCTTCGACC	35	C9orf91	1
TTGAGTTTACCATCCCACTG	DPY19L3	HGLibA_13912	TTGAGTTTACCATCCCACTG	35	DPY19L3	1
CTTACCTCGCAAGTTTGCTG	GCH1	HGLibA_18781	CTTACCTCGCAAGTTTGCTG	35	GCH1	1
TTCGAACACCGACCTCGTCC	GDF15	HGLibA_18860	TTCGAACACCGACCTCGTCC	35	GDF15	1
CCGCCGGGGCGCTGCGAGAC	GXYLT2	HGLibA_20686	CCGCCGGGGCGCTGCGAGAC	35	GXYLT2	1
GCACCTGAACGCCAAGGCTG	hsa-mir-3150a	HGLibA_23709	GCACCTGAACGCCAAGGCTG	35	hsa-mir-3150a	1
AACGCTAGTGTCTTTCCCCC	NSUN4	HGLibA_40076	AACGCTAGTGTCTTTCCCCC	35	NSUN4	1
CAACAGCTGTGTTGAGAAGA	PAEP	HGLibA_42273	CAACAGCTGTGTTGAGAAGA	35	PAEP	1
CATCGATGGACGCATTCAGA	PDE9A	HGLibA_43124	CATCGATGGACGCATTCAGA	35	PDE9A	1
CAAGATCTGCCGCTACCTAT	PRG3	HGLibA_45742	CAAGATCTGCCGCTACCTAT	35	PRG3	1
TCATCATCTACGAGTTTGCT	SF3B1	HGLibA_50988	TCATCATCTACGAGTTTGCT	35	SF3B1	1
TCCCACTGATCTATCGTATT	SMAD2	HGLibA_52859	TCCCACTGATCTATCGTATT	35	SMAD2	1
CTGGCCGAGGAGTTCCGCCC	SMARCA4	HGLibA_52895	CTGGCCGAGGAGTTCCGCCC	35	SMARCA4	1
TACCATCTCGTTGGCCTCGT	SPANXA1	HGLibA_53666	TACCATCTCGTTGGCCTCGT	35	SPANXA1	1
CCACCGCATCGACTCCACCG	STK11	HGLibA_54742	CCACCGCATCGACTCCACCG	35	STK11	1
AAACGCATTGCCAAAGCTTC	TCP1	HGLibA_56118	AAACGCATTGCCAAAGCTTC	35	TCP1	1
CACGATGTAGCGCTGCTCGT	TMEM184B	HGLibA_57401	CACGATGTAGCGCTGCTCGT	35	TMEM184B	1
ATTACTTACCTTTCTTTCGC	TPTE2	HGLibA_58503	ATTACTTACCTTTCTTTCGC	35	TPTE2	1
ACACAATGGTGTTCGCATTT	VSIG1	HGLibA_61124	ACACAATGGTGTTCGCATTT	35	VSIG1	1
CATTTCGGTCAACCTCCTGT	LBP	HGLibA_33368	CATTTCGGTCAACCTCCTGT	35
CATCACCCTGAGTATTTAGT	ACTR8	HGLibA_00675	CATCACCCTGAGTATTTAGT	34	ACTR8	2
GAGCCGTTACCTTTCTGCTG	FAM188B	HGLibA_16347	GAGCCGTTACCTTTCTGCTG	34	FAM188B	2
GACCACTTACCTGCACCTCA	FGD1	HGLibA_17342	GACCACTTACCTGCACCTCA	34	FGD1	2
ACCCTCGTTCCAGTTTGTGT	MBL2	HGLibA_35786	ACCCTCGTTCCAGTTTGTGT	34	MBL2	2
CTGGCGCAGCTCGTCGCTGT	APOA1	HGLibA_02448	CTGGCGCAGCTCGTCGCTGT	34	APOA1	1
GTAATGCTCGGACAACGTGC	ARIH2OS	HGLibA_02917	GTAATGCTCGGACAACGTGC	34	ARIH2OS	1
GGGAGCACTTCGAAAACCAC	C8orf44	HGLibA_06623	GGGAGCACTTCGAAAACCAC	34	C8orf44	1
GGATCGAATAGCAGCAGAAT	DYM	HGLibA_14227	GGATCGAATAGCAGCAGAAT	34	DYM	1
AGCCGTAAGAATACACCATC	EMC1	HGLibA_15003	AGCCGTAAGAATACACCATC	34	EMC1	1
GACGATGGAACTCCACATCC	GATSL2	HGLibA_18703	GACGATGGAACTCCACATCC	34	GATSL2	1
TAAGTGTCCTAGCACTTAGC	hsa-mir-374b	HGLibA_24449	TAAGTGTCCTAGCACTTAGC	34	hsa-mir-374b	1
TACCATTCATTTCCTTGTGA	KCNT2	HGLibA_31685	TACCATTCATTTCCTTGTGA	34	KCNT2	1
GCAAAGTCCCGAGCCTCGTC	NDUFAB1	HGLibA_38767	GCAAAGTCCCGAGCCTCGTC	34	NDUFAB1	1
TCCGCTGTACTCATCCTCAA	PPP5C	HGLibA_45501	TCCGCTGTACTCATCCTCAA	34	PPP5C	1
GCCGTCGCAGGATGAAGGAT	STX1B	HGLibA_54928	GCCGTCGCAGGATGAAGGAT	34	STX1B	1
AGTCACGAAGCAGTTTACTG	THPO	HGLibA_56674	AGTCACGAAGCAGTTTACTG	34	THPO	1
ACAGAACAGTATCCCGATTG	C2orf80	HGLibA_06187	ACAGAACAGTATCCCGATTG	33	C2orf80	2
ACCCGCGTTCATGCAACGCC	CEBPB	HGLibA_08958	ACCCGCGTTCATGCAACGCC	33	CEBPB	2
ATGGTTTCACTATCCCCAGA	hsa-mir-3713	HGLibA_24421	ATGGTTTCACTATCCCCAGA	33	hsa-mir-3713	2
CGGCTACACAGAGACCTATA	ADAM8	HGLibA_00781	CGGCTACACAGAGACCTATA	33	ADAM8	1
CCTCAGTACCTCAGCGTGTC	C15orf43	HGLibA_05402	CCTCAGTACCTCAGCGTGTC	33	C15orf43	1
GTGCTGCTCGCCGCTTCGGT	CCDC92	HGLibA_07928	GTGCTGCTCGCCGCTTCGGT	33	CCDC92	1
TGCCTGCCCCAACCTCTTTC	hsa-mir-2682	HGLibA_23416	TGCCTGCCCCAACCTCTTTC	33	hsa-mir-2682	1
CTGCAGAATTATTTTGAGAC	hsa-mir-4524a	HGLibA_25607	CTGCAGAATTATTTTGAGAC	33	hsa-mir-4524a	1
CAAGGGGCTGCCAGGGAGGC	hsa-mir-6754	HGLibA_28227	CAAGGGGCTGCCAGGGAGGC	33	hsa-mir-6754	1
CCTGAGGAACAGAGGACATC	hsa-mir-6852	HGLibA_28634	CCTGAGGAACAGAGGACATC	33	hsa-mir-6852	1
CCTGGATCACATTGCCATAC	ITPR1	HGLibA_31142	CCTGGATCACATTGCCATAC	33	ITPR1	1
GCGAGCTGTGCGGCTACTCG	KCNH2	HGLibA_31500	GCGAGCTGTGCGGCTACTCG	33	KCNH2	1
GAAACAGAATGCTGACCCGC	MAGED2	HGLibA_35260	GAAACAGAATGCTGACCCGC	33	MAGED2	1
CTCAGAGTATACCACGTTCA	MMAB	HGLibA_36742	CTCAGAGTATACCACGTTCA	33	MMAB	1
CCCCGCCGGATCACTGTCTT	NLGN3	HGLibA_39360	CCCCGCCGGATCACTGTCTT	33	NLGN3	1
ACCCGAGTGATGAATAGCCG	ORMDL2	HGLibA_41915	ACCCGAGTGATGAATAGCCG	33	ORMDL2	1
ACTGTTAGCGTGTATCTACC	PANX1	HGLibA_42396	ACTGTTAGCGTGTATCTACC	33	PANX1	1
GAAGATGCCTACAAATTCGC	RAB35	HGLibA_47178	GAAGATGCCTACAAATTCGC	33	RAB35	1
TTCCTCGTCCTCGCTTGTCG	SHANK1	HGLibA_51275	TTCCTCGTCCTCGCTTGTCG	33	SHANK1	1
GTTATTTCTCAGCTCGTTGG	STX6	HGLibA_54941	GTTATTTCTCAGCTCGTTGG	33	STX6	1
CGTTGAATGAGTACCAGTTG	TRIM42	HGLibA_58787	CGTTGAATGAGTACCAGTTG	33	TRIM42	1
GGAGGAAGACTCACTCTACT	USP17L12	HGLibA_60509	GGAGGAAGACTCACTCTACT	33	USP17L12	1
GAACACATGCCATTTGTACG	ZFAND6	HGLibA_62451	GAACACATGCCATTTGTACG	33	ZFAND6	1
CAACAGGATGGAATCCGACG	ZNF367	HGLibA_63169	CAACAGGATGGAATCCGACG	33	ZNF367	1
TCCACCGCACCGCCTTGCAC	ANKRD23	HGLibA_02042	TCCACCGCACCGCCTTGCAC	32	ANKRD23	2
GACTTCTTCACCGCTCTCGT	CCR2	HGLibA_08149	GACTTCTTCACCGCTCTCGT	32	CCR2	2
CTCCGAGTTCTAAGTGTGTA	FAM122B	HGLibA_16069	CTCCGAGTTCTAAGTGTGTA	32	FAM122B	2
TAACACACGCTACCTCTTTC	PPP3CC	HGLibA_45478	TAACACACGCTACCTCTTTC	32	PPP3CC	2
TGCGGCGCGGCTGTACCGCG	QSOX2	HGLibA_47046	TGCGGCGCGGCTGTACCGCG	32	QSOX2	2
TTTGTGGAAAGTGACGACTT	TBX3	HGLibA_55955	TTTGTGGAAAGTGACGACTT	32	TBX3	2
TTGTTGGCTAATAGAACAAC	ARL14	HGLibA_02935	TTGTTGGCTAATAGAACAAC	32	ARL14	1
AACAATCAGCACCAGTGCCG	CLDN8	HGLibA_09909	AACAATCAGCACCAGTGCCG	32	CLDN8	1
GACACCTCCTCCGACGTCCG	D2HGDH	HGLibA_12255	GACACCTCCTCCGACGTCCG	32	D2HGDH	1
CACGCCGATCGTCATACAGC	DNAJC5	HGLibA_13623	CACGCCGATCGTCATACAGC	32	DNAJC5	1
CAGTGATGTTGCATTCCTTG	DPH5	HGLibA_13847	CAGTGATGTTGCATTCCTTG	32	DPH5	1
CCACGCCTGCATGCCTGCGC	DZIP1L	HGLibA_14302	CCACGCCTGCATGCCTGCGC	32	DZIP1L	1
GAGTTACTCTCCTAGTGACC	ELP3	HGLibA_14982	GAGTTACTCTCCTAGTGACC	32	ELP3	1
GTGTGCTATCAAATCCAATT	FKTN	HGLibA_17601	GTGTGCTATCAAATCCAATT	32	FKTN	1
GTTGCCGTCCCACACGTACG	HAS1	HGLibA_20862	GTTGCCGTCCCACACGTACG	32	HAS1	1
CTTGTAGGTGGTCGCTGACC	HEPHL1	HGLibA_21148	CTTGTAGGTGGTCGCTGACC	32	HEPHL1	1
TCAGCCCCGCAGAGCGTCTC	IGF1	HGLibA_30078	TCAGCCCCGCAGAGCGTCTC	32	IGF1	1
TGATGCACAACACGTTTGCT	IGIP	HGLibA_30148	TGATGCACAACACGTTTGCT	32	IGIP	1
TCGACTTCTTTGGACCTAAC	KNSTRN	HGLibA_32637	TCGACTTCTTTGGACCTAAC	32	KNSTRN	1
TCCTCTGCCGCCCCATATGC	KRTAP10-5	HGLibA_32901	TCCTCTGCCGCCCCATATGC	32	KRTAP10-5	1
CGTACTCACCGAGGCCTGGG	PHC1	HGLibA_43607	CGTACTCACCGAGGCCTGGG	32	PHC1	1
TATGAGCCAGCTGTTCCGAA	PI4KB	HGLibA_43790	TATGAGCCAGCTGTTCCGAA	32	PI4KB	1
TGTACTGCACAGTCTCCGAC	RNF157	HGLibA_48840	TGTACTGCACAGTCTCCGAC	32	RNF157	1
ATCTTGTCCATCTAGACTTA	SKP2	HGLibA_51586	ATCTTGTCCATCTAGACTTA	32	SKP2	1
CAAGATAAGCCCGTTTCTCC	SLC22A31	HGLibA_51874	CAAGATAAGCCCGTTTCTCC	32	SLC22A31	1
CCCATCCGCTATTCCCACGC	WFIKKN2	HGLibA_61572	CCCATCCGCTATTCCCACGC	32	WFIKKN2	1
AAGTTCTGATGTACGACCAA	ZNF565	HGLibA_63544	AAGTTCTGATGTACGACCAA	32	ZNF565	1
ATATCATCCTCAACCCTAAA	ZNF91	HGLibA_64193	ATATCATCCTCAACCCTAAA	32	ZNF91	1
CTTCATATATTCTCAGGCAT	hsa-mir-204	HGLibA_23227	CTTCATATATTCTCAGGCAT	32
CTGTGTTGCAGTGACCGTGG	TMEM183A	HGLibA_57394	CTGTGTTGCAGTGACCGTGG	32
TTTATGCCAGTTCACAACTC	CASC1	HGLibA_07267	TTTATGCCAGTTCACAACTC	31	CASC1	2
CTATGTATCCTTTCGGCATG	CASP10	HGLibA_07297	CTATGTATCCTTTCGGCATG	31	CASP10	2
GCAGGTTGGAGAGCGGCTGA	DMRTC2	HGLibA_13442	GCAGGTTGGAGAGCGGCTGA	31	DMRTC2	2
ACCCATTCCTACAGCTCAGC	PSMA2	HGLibA_46361	ACCCATTCCTACAGCTCAGC	31	PSMA2	2
CAGTATTCACCAGCATCCAA	BEX1	HGLibA_04439	CAGTATTCACCAGCATCCAA	31	BEX1	1
CATGGTCCATGTAAGTGCTC	C20orf96	HGLibA_06032	CATGGTCCATGTAAGTGCTC	31	C20orf96	1
AGCGCTCGCGACGTCGTTCC	C9orf47	HGLibA_06736	AGCGCTCGCGACGTCGTTCC	31	C9orf47	1
TTCGAGAGCCCAGGTTACGA	CCDC142	HGLibA_07619	TTCGAGAGCCCAGGTTACGA	31	CCDC142	1
CTGTACAGTCAGAAACAGAG	CXADR	HGLibA_11840	CTGTACAGTCAGAAACAGAG	31	CXADR	1
CGTAGCCGTCACGTTCCATG	FEM1A	HGLibA_17272	CGTAGCCGTCACGTTCCATG	31	FEM1A	1
GAAGCTGCGACCGCAATCCC	FGGY	HGLibA_17458	GAAGCTGCGACCGCAATCCC	31	FGGY	1
GAAGGGTAGATGACGCCCTC	GPR56	HGLibA_20056	GAAGGGTAGATGACGCCCTC	31	GPR56	1
GATTGGGAAATGAAGGATTA	hsa-mir-4788	HGLibA_26312	GATTGGGAAATGAAGGATTA	31	hsa-mir-4788	1
ACTGGCCTCTTCTTTCTCCT	hsa-mir-6878	HGLibA_28749	ACTGGCCTCTTCTTTCTCCT	31	hsa-mir-6878	1
CTTAATCTCATGCCGACATG	IL36A	HGLibA_30434	CTTAATCTCATGCCGACATG	31	IL36A	1
AATCGCTCGTGTGCCCGTTC	KIAA1614	HGLibA_32080	AATCGCTCGTGTGCCCGTTC	31	KIAA1614	1
TCTGGTGCTCCACCAATGCC	MAPK1IP1L	HGLibA_35556	TCTGGTGCTCCACCAATGCC	31	MAPK1IP1L	1
CAGGTGACTTGGCAGTCGTC	MAST2	HGLibA_35690	CAGGTGACTTGGCAGTCGTC	31	MAST2	1
CACTTACCCAAATTCGGATC	MED12L	HGLibA_36033	CACTTACCCAAATTCGGATC	31	MED12L	1
AATTAGCTCCAAATCCTCCT	MVK	HGLibA_37887	AATTAGCTCCAAATCCTCCT	31	MVK	1
CATTAGTCTGATACCTGTGC	NonTargetingControlGuideForHuman_0661	HGLibA_65044	CATTAGTCTGATACCTGTGC	31	NonTargetingControlGuideForHuman_0661	1
GCGAGGCGATGTCCCGCACG	NYAP1	HGLibA_40468	GCGAGGCGATGTCCCGCACG	31	NYAP1	1
GATAAGATGGATTTGCGGTT	POLE	HGLibA_44798	GATAAGATGGATTTGCGGTT	31	POLE	1
CGGGCAAGTCGGTGCGCACC	POM121L2	HGLibA_44940	CGGGCAAGTCGGTGCGCACC	31	POM121L2	1
CCACGACTCGCTGAAACTGC	SASH3	HGLibA_50052	CCACGACTCGCTGAAACTGC	31	SASH3	1
GTCTGGTCTTCTGCACGTCA	TLDC2	HGLibA_56892	GTCTGGTCTTCTGCACGTCA	31	TLDC2	1
CTAGCTTGACGTCAATGTTC	UBASH3B	HGLibA_59850	CTAGCTTGACGTCAATGTTC	31	UBASH3B	1
TGCCAATAACGAGCTACTTC	UGDH	HGLibA_60151	TGCCAATAACGAGCTACTTC	31	UGDH	1
GGCCAGTCTTGGCCGCTAAC	ZHX2	HGLibA_62604	GGCCAGTCTTGGCCGCTAAC	31	ZHX2	1
GCCAGAAGCGTTCTCTTTAT	ZNF790	HGLibA_64053	GCCAGAAGCGTTCTCTTTAT	31	ZNF790	1
AGACCATTTGCAAACTATGA	CENPQ	HGLibA_09082	AGACCATTTGCAAACTATGA	30	CENPQ	2
GTATACTCCATCGCAGACCG	REM1	HGLibA_48117	GTATACTCCATCGCAGACCG	30	REM1	2
CTGCTTCGACCGTGTCAAAA	ROMO1	HGLibA_49046	CTGCTTCGACCGTGTCAAAA	30	ROMO1	2
GACAGCTTCCAATGACCTGA	ABCG2	HGLibA_00218	GACAGCTTCCAATGACCTGA	30	ABCG2	1
TCAGCCCGCTCATCAAATCC	ANXA5	HGLibA_02243	TCAGCCCGCTCATCAAATCC	30	ANXA5	1
ACTGAAAGAAATCGTGCTTG	CASQ2	HGLibA_07338	ACTGAAAGAAATCGTGCTTG	30	CASQ2	1
CTCTGAGGCCGTTGTATCCC	CEACAM19	HGLibA_08928	CTCTGAGGCCGTTGTATCCC	30	CEACAM19	1
TCCATAGCCATTGTTTCTGA	CXorf48	HGLibA_11930	TCCATAGCCATTGTTTCTGA	30	CXorf48	1
CCCTTGAGCATCCATCCTCA	F5	HGLibA_15876	CCCTTGAGCATCCATCCTCA	30	F5	1
TCCCGCCTTGATCGCCGTAA	FAM64A	HGLibA_16664	TCCCGCCTTGATCGCCGTAA	30	FAM64A	1
GTCCAACAGCGACCGAGTGT	FGF12	HGLibA_17368	GTCCAACAGCGACCGAGTGT	30	FGF12	1
AACCACGTCCCGCCCTACTA	GATA3	HGLibA_18672	AACCACGTCCCGCCCTACTA	30	GATA3	1
TGAAGTATGGGTTCTGTAAC	HAUS4	HGLibA_20882	TGAAGTATGGGTTCTGTAAC	30	HAUS4	1
AAATAAAGGAAGTTAGGCTG	hsa-mir-3184	HGLibA_23886	AAATAAAGGAAGTTAGGCTG	30	hsa-mir-3184	1
TCAGCTCCAGCGCCTCGTTG	KCND3	HGLibA_31469	TCAGCTCCAGCGCCTCGTTG	30	KCND3	1
ATGTCCACCTTAGTTTCTCG	KCNIP1	HGLibA_31522	ATGTCCACCTTAGTTTCTCG	30	KCNIP1	1
CGCACTCTTCACCTAAGCAG	KIAA1191	HGLibA_31995	CGCACTCTTCACCTAAGCAG	30	KIAA1191	1
CTCACCTGTCTTTGACGCGC	MRAS	HGLibA_37102	CTCACCTGTCTTTGACGCGC	30	MRAS	1
TCCCGTACCGCTCCTCCGCC	PSTPIP1	HGLibA_46526	TCCCGTACCGCTCCTCCGCC	30	PSTPIP1	1
AGACTGACCGGATATATTGC	VPS11	HGLibA_61017	AGACTGACCGGATATATTGC	30	VPS11	1
ACGGGGAGCGCCTAGTCCTC	XXYLT1	HGLibA_61900	ACGGGGAGCGCCTAGTCCTC	30	XXYLT1	1
ATTGGCGTCTATAGTCTGTA	LRAT	HGLibA_34420	ATTGGCGTCTATAGTCTGTA	30
CGCCGAGAGCTCGCCGTCGC	DCAF12L1	HGLibA_12422	CGCCGAGAGCTCGCCGTCGC	29	DCAF12L1	2
GGACCTCCACTGTCTGCCGC	TRIM8	HGLibA_58904	GGACCTCCACTGTCTGCCGC	29	TRIM8	2
CAGCTATGGACCTCGGCCTG	ARHGDIB	HGLibA_02798	CAGCTATGGACCTCGGCCTG	29	ARHGDIB	1
AGGCACAATAAATGCCTTGC	CARD18	HGLibA_07233	AGGCACAATAAATGCCTTGC	29	CARD18	1
CGGCGACCCCCGGCAGATCG	CMIP	HGLibA_10195	CGGCGACCCCCGGCAGATCG	29	CMIP	1
TTGAGCGTACTCCTCTGCCC	CNP	HGLibA_10357	TTGAGCGTACTCCTCTGCCC	29	CNP	1
ATGATGCTTCTCACTGTGTA	COX14	HGLibA_10809	ATGATGCTTCTCACTGTGTA	29	COX14	1
CAGCGGCAACCTCATCCCAC	CYP1A2	HGLibA_12070	CAGCGGCAACCTCATCCCAC	29	CYP1A2	1
CTGCACGCGTTGTACACAAC	DEF8	HGLibA_12788	CTGCACGCGTTGTACACAAC	29	DEF8	1
AAGCCGACAGATCTCACCTC	DIAPH3	HGLibA_13223	AAGCCGACAGATCTCACCTC	29	DIAPH3	1
GGCTTCCCTCCCAACAGCAT	FAM156B	HGLibA_16190	GGCTTCCCTCCCAACAGCAT	29	FAM156B	1
ACTTCAGTCCTCCGACTCTG	FETUB	HGLibA_17306	ACTTCAGTCCTCCGACTCTG	29	FETUB	1
ACTCATCTCCCACGCAAGAC	GTPBP5	HGLibA_20614	ACTCATCTCCCACGCAAGAC	29	GTPBP5	1
ACGAGGCCCGGATGGCGATC	HLF	HGLibA_21655	ACGAGGCCCGGATGGCGATC	29	HLF	1
CTGCCTTCTCTCCATCCTTG	hsa-mir-4325	HGLibA_25076	CTGCCTTCTCTCCATCCTTG	29	hsa-mir-4325	1
GCTGTGACCAATTCCTAGGT	hsa-mir-548ap	HGLibA_26966	GCTGTGACCAATTCCTAGGT	29	hsa-mir-548ap	1
TACCTACAGAGGCGACATGG	hsa-mir-6859-2	HGLibA_28668	TACCTACAGAGGCGACATGG	29	hsa-mir-6859-2	1
GCTTCTCGAAGAGCGCCCGC	KCNN1	HGLibA_31643	GCTTCTCGAAGAGCGCCCGC	29	KCNN1	1
CTTTACTCAGGGGGTTACAC	LZTR1	HGLibA_35091	CTTTACTCAGGGGGTTACAC	29	LZTR1	1
GCATCTGCTGACTCAGCTTG	NCKAP5	HGLibA_38605	GCATCTGCTGACTCAGCTTG	29	NCKAP5	1
TTCGGAGATGATCGAGACGC	NKIRAS2	HGLibA_39306	TTCGGAGATGATCGAGACGC	29	NKIRAS2	1
CACTTACACATGAGGCGGTA	NonTargetingControlGuideForHuman_0553	HGLibA_64936	CACTTACACATGAGGCGGTA	29	NonTargetingControlGuideForHuman_0553	1
CCAAAAAGATGAATATCTCG	NonTargetingControlGuideForHuman_0782	HGLibA_65165	CCAAAAAGATGAATATCTCG	29	NonTargetingControlGuideForHuman_0782	1
CCCCGCAGCGTATCTGGTGC	NRN1	HGLibA_39997	CCCCGCAGCGTATCTGGTGC	29	NRN1	1
ACAGGTGAACAGTCTACACG	NUMA1	HGLibA_40296	ACAGGTGAACAGTCTACACG	29	NUMA1	1
GTCCAACACATCTATCCTAA	PBDC1	HGLibA_42616	GTCCAACACATCTATCCTAA	29	PBDC1	1
ACCTTGAAATGCCAAATTCT	PDE3B	HGLibA_43072	ACCTTGAAATGCCAAATTCT	29	PDE3B	1
TCTTACCGCTTTCCGGACCT	PRC1	HGLibA_45637	TCTTACCGCTTTCCGGACCT	29	PRC1	1
CGACCGCCGCAGCGTACAAC	RNF39	HGLibA_48960	CGACCGCCGCAGCGTACAAC	29	RNF39	1
CAAGACCCTGACATATCCGC	SLC25A19	HGLibA_51951	CAAGACCCTGACATATCCGC	29	SLC25A19	1
TCAAGTCACTCCTAGGGAGC	SLC28A1	HGLibA_52119	TCAAGTCACTCCTAGGGAGC	29	SLC28A1	1
TCTTACTTCAACGTAGTCTG	SNX9	HGLibA_53398	TCTTACTTCAACGTAGTCTG	29	SNX9	1
CCAGTCTACCCTTTGATGAC	STAG3	HGLibA_54615	CCAGTCTACCCTTTGATGAC	29	STAG3	1
TACCACCAGTAATAGAATCC	TAF1	HGLibA_55482	TACCACCAGTAATAGAATCC	29	TAF1	1
TGGTATCAAGTTTGCTAGCA	TAS2R20	HGLibA_55669	TGGTATCAAGTTTGCTAGCA	29	TAS2R20	1
ACCTGTTGATCATGTCATCC	USP9Y	HGLibA_60707	ACCTGTTGATCATGTCATCC	29	USP9Y	1
GAACGTAGGCACACTCGGTA	VASH1	HGLibA_60817	GAACGTAGGCACACTCGGTA	29	VASH1	1
GACAGGTTGTTGAAACGAGA	ZFYVE20	HGLibA_62567	GACAGGTTGTTGAAACGAGA	29	ZFYVE20	1
AAATTCTTTAGCCGCAACTC	ZNF304	HGLibA_63065	AAATTCTTTAGCCGCAACTC	29	ZNF304	1
ATTGATACTCACCGTCTCTA	DRD1	HGLibA_13958	ATTGATACTCACCGTCTCTA	28	DRD1	3
GAATAATAAACAGGTATCGC	hsa-mir-3139	HGLibA_23667	GAATAATAAACAGGTATCGC	28	hsa-mir-3139	2
TAAATTGTCACCGAAATCAC	LIPK	HGLibA_33913	TAAATTGTCACCGAAATCAC	28	LIPK	2
CACGCCATTGGTCACGGCAC	SLC52A1	HGLibA_52532	CACGCCATTGGTCACGGCAC	28	SLC52A1	2
TAGGGTATTGATGACGTCAC	AK4	HGLibA_01384	TAGGGTATTGATGACGTCAC	28	AK4	1
GTCGCCCGTACAGTGCTGCC	ANKS1A	HGLibA_02149	GTCGCCCGTACAGTGCTGCC	28	ANKS1A	1
CTCCTACGTATTACGATGCC	ANXA7	HGLibA_02248	CTCCTACGTATTACGATGCC	28	ANXA7	1
GCGGGTACAATCCATCGTCG	ARHGAP30	HGLibA_02753	GCGGGTACAATCCATCGTCG	28	ARHGAP30	1
CTGTCCTTACCGACATAGCC	CAMK1D	HGLibA_07062	CTGTCCTTACCGACATAGCC	28	CAMK1D	1
ATTCTAGTTGGTAGATCTTA	CCDC174	HGLibA_07704	ATTCTAGTTGGTAGATCTTA	28	CCDC174	1
CCGCATACCTGTCCTTCGCG	CCZ1B	HGLibA_08225	CCGCATACCTGTCCTTCGCG	28	CCZ1B	1
CCGAGGACAAATGATTCTCT	CHN2	HGLibA_09508	CCGAGGACAAATGATTCTCT	28	CHN2	1
ATATGCACGTCAAGCCCATC	CLPSL2	HGLibA_10111	ATATGCACGTCAAGCCCATC	28	CLPSL2	1
ACAGACGGGCCGCATTGACA	CORO1B	HGLibA_10776	ACAGACGGGCCGCATTGACA	28	CORO1B	1
TTGCCTCCCCATATCCAATA	CYP4A22	HGLibA_12176	TTGCCTCCCCATATCCAATA	28	CYP4A22	1
TAGCGATGCAGCGGCCGCCG	DMRTA2	HGLibA_13430	TAGCGATGCAGCGGCCGCCG	28	DMRTA2	1
TGAACAGCCTGATTATGATT	EPC1	HGLibA_15265	TGAACAGCCTGATTATGATT	28	EPC1	1
GAGGAAAATATGTCGGTACA	EPG5	HGLibA_15279	GAGGAAAATATGTCGGTACA	28	EPG5	1
TAACTTCTTGTGTGTCGCTC	FGF7	HGLibA_17416	TAACTTCTTGTGTGTCGCTC	28	FGF7	1
TGCAATGGTTGGATTACTCC	GCNT7	HGLibA_18821	TGCAATGGTTGGATTACTCC	28	GCNT7	1
GCTGGAGCACTACGACTTGC	GGN	HGLibA_19002	GCTGGAGCACTACGACTTGC	28	GGN	1
TTGATCCTTTAGAGCATCAC	GOLGB1	HGLibA_19649	TTGATCCTTTAGAGCATCAC	28	GOLGB1	1
AGTAGTTCTTTGTACGAAGA	GPALPP1	HGLibA_19722	AGTAGTTCTTTGTACGAAGA	28	GPALPP1	1
TCTGCCTCCAGGTGGTACAT	HDC	HGLibA_21030	TCTGCCTCCAGGTGGTACAT	28	HDC	1
TCCAGTTGTTCAACCATTGC	HELLS	HGLibA_21114	TCCAGTTGTTCAACCATTGC	28	HELLS	1
CTTCTTAAGCCCGCTCTCCA	HIST2H3A	HGLibA_21539	CTTCTTAAGCCCGCTCTCCA	28	HIST2H3A	1
GTCATGGAAGCTGGAAGCAG	hsa-mir-2115	HGLibA_23287	GTCATGGAAGCTGGAAGCAG	28	hsa-mir-2115	1
TTTCCTCACTCCCGTGAAGT	hsa-mir-3124	HGLibA_23603	TTTCCTCACTCCCGTGAAGT	28	hsa-mir-3124	1
ATATAAAGCGAAAATAACAT	hsa-mir-495	HGLibA_26436	ATATAAAGCGAAAATAACAT	28	hsa-mir-495	1
CTTGTATTTCTTTATTAGTC	hsa-mir-548aa-1	HGLibA_26901	CTTGTATTTCTTTATTAGTC	28	hsa-mir-548aa-1	1
AAAGCTGACAGACAGCTGCT	hsa-mir-5691	HGLibA_27339	AAAGCTGACAGACAGCTGCT	28	hsa-mir-5691	1
ACAGAGGAGAAGCCCAGGAA	hsa-mir-6783	HGLibA_28363	ACAGAGGAGAAGCCCAGGAA	28	hsa-mir-6783	1
CACTACTCTCAAATCTGTTC	IL6	HGLibA_30470	CACTACTCTCAAATCTGTTC	28	IL6	1
GTGTCTGCCATCACCGACTG	KIAA1324	HGLibA_32024	GTGTCTGCCATCACCGACTG	28	KIAA1324	1
GCAGTGCTTCCGACGAAATC	MAP3K4	HGLibA_35474	GCAGTGCTTCCGACGAAATC	28	MAP3K4	1
CTCACTTAACTGTTCCCCGC	MVB12B	HGLibA_37881	CTCACTTAACTGTTCCCCGC	28	MVB12B	1
GCTGTATCGAGCCTGCGCCG	NELFB	HGLibA_38963	GCTGTATCGAGCCTGCGCCG	28	NELFB	1
CTGTACATACCTGTCCATTG	NOTCH2	HGLibA_39631	CTGTACATACCTGTCCATTG	28	NOTCH2	1
AGAGCACCCGGTCTTCCCGA	PARS2	HGLibA_42542	AGAGCACCCGGTCTTCCCGA	28	PARS2	1
TCCTACCGACTGGATGACAC	RFWD3	HGLibA_48247	TCCTACCGACTGGATGACAC	28	RFWD3	1
CAGAACTGCCGGGTATTTAA	RWDD2B	HGLibA_49773	CAGAACTGCCGGGTATTTAA	28	RWDD2B	1
ACGGAGCGCCATGAAGTCCG	SETD8	HGLibA_50948	ACGGAGCGCCATGAAGTCCG	28	SETD8	1
TTTGAGAGCACCGACGCATC	TEX15	HGLibA_56354	TTTGAGAGCACCGACGCATC	28	TEX15	1
GCCAAGTCAGTGTATGTGGT	UROS	HGLibA_60446	GCCAAGTCAGTGTATGTGGT	28	UROS	1
AAGTGTTGAGCGACGAATAA	ZFP14	HGLibA_62476	AAGTGTTGAGCGACGAATAA	28	ZFP14	1
TGTAACTTGACATTAAGTGC	ZNF165	HGLibA_62805	TGTAACTTGACATTAAGTGC	28	ZNF165	1
GAAAAACCTTATGAGTGTGT	ZNF501	HGLibA_63399	GAAAAACCTTATGAGTGTGT	28	ZNF501	1
CCATCCAAGATCAACCGAGC	CARD11	HGLibA_07220	CCATCCAAGATCAACCGAGC	28
CTCAGCACTCCACGCCGTAG	B9D2	HGLibA_04046	CTCAGCACTCCACGCCGTAG	27	B9D2	2
TGAGTCATAGATCGAGTCTT	GPR19	HGLibA_19993	TGAGTCATAGATCGAGTCTT	27	GPR19	2
TGGAAGCGAGCACCCAAGTC	hsa-mir-496	HGLibA_26437	TGGAAGCGAGCACCCAAGTC	27	hsa-mir-496	2
AGAGAGCTTCCACCTGAACG	MAN1C1	HGLibA_35354	AGAGAGCTTCCACCTGAACG	27	MAN1C1	2
TCTCTCAGTACATCCAGCAG	RPL23	HGLibA_49193	TCTCTCAGTACATCCAGCAG	27	RPL23	2
TCGCCTCTTCGCCGGCGCAC	SLC25A42	HGLibA_52028	TCGCCTCTTCGCCGGCGCAC	27	SLC25A42	2
GACACAACGCCCAAATACGC	TCP10	HGLibA_56120	GACACAACGCCCAAATACGC	27	TCP10	2
AAATCCGTGACCACAACATC	AADACL3	HGLibA_00035	AAATCCGTGACCACAACATC	27	AADACL3	1
ACGCGCCGTCCACTCGCCCA	AP2A1	HGLibA_02304	ACGCGCCGTCCACTCGCCCA	27	AP2A1	1
GAGGACTCTACCTGTTTGCC	BATF	HGLibA_04174	GAGGACTCTACCTGTTTGCC	27	BATF	1
GACAGCGTCCTCAATATCAT	CAMSAP2	HGLibA_07109	GACAGCGTCCTCAATATCAT	27	CAMSAP2	1
GTTCACGTTGAGCCTCTTTG	CASKIN2	HGLibA_07293	GTTCACGTTGAGCCTCTTTG	27	CASKIN2	1
CGTACTAAGAACGTGCCTTC	CISH	HGLibA_09737	CGTACTAAGAACGTGCCTTC	27	CISH	1
GGAGCGCATCGTGTGCGTCA	CLPP	HGLibA_10101	GGAGCGCATCGTGTGCGTCA	27	CLPP	1
TCACTTACTGCCCGCCGTGA	ENDOG	HGLibA_15117	TCACTTACTGCCCGCCGTGA	27	ENDOG	1
ATGAGCGTGGCCGGCCGCTC	FAM171A2	HGLibA_16268	ATGAGCGTGGCCGGCCGCTC	27	FAM171A2	1
GATTCGCTCCATCAATGACC	FAM96B	HGLibA_16805	GATTCGCTCCATCAATGACC	27	FAM96B	1
GTATTGAACGATGATCACGA	FFAR2	HGLibA_17327	GTATTGAACGATGATCACGA	27	FFAR2	1
GTTTATTGTGACATGTCCGA	FGL1	HGLibA_17461	GTTTATTGTGACATGTCCGA	27	FGL1	1
CATGAACATGTCGTCGTACG	FOXA2	HGLibA_17809	CATGAACATGTCGTCGTACG	27	FOXA2	1
GCCAATTACGTGTATTTCCT	GGPS1	HGLibA_19007	GCCAATTACGTGTATTTCCT	27	GGPS1	1
ACTCACTGTGATAAACCAAT	HINT3	HGLibA_21330	ACTCACTGTGATAAACCAAT	27	HINT3	1
CCCATGTTGCTGCTGTTCCC	hsa-mir-1538	HGLibA_22972	CCCATGTTGCTGCTGTTCCC	27	hsa-mir-1538	1
TGAGCTAGAATACAAGTAGT	hsa-mir-643	HGLibA_27868	TGAGCTAGAATACAAGTAGT	27	hsa-mir-643	1
CGGTGTGTAGCAGTCTTTGT	INSIG2	HGLibA_30667	CGGTGTGTAGCAGTCTTTGT	27	INSIG2	1
AGCTCGTTCAACTTCACTGC	KIAA1958	HGLibA_32118	AGCTCGTTCAACTTCACTGC	27	KIAA1958	1
GCTGCAAGCCCGTGTGCTCC	KRTAP5-2	HGLibA_33078	GCTGCAAGCCCGTGTGCTCC	27	KRTAP5-2	1
TGCACAGCGCCCACAGCGAG	LIME1	HGLibA_33826	TGCACAGCGCCCACAGCGAG	27	LIME1	1
CCTTTGCCAATGATTACATC	LOC152586	HGLibA_34181	CCTTTGCCAATGATTACATC	27	LOC152586	1
CCGTGGCAGTCGGGTGAAGT	LTBP2	HGLibA_34882	CCGTGGCAGTCGGGTGAAGT	27	LTBP2	1
TGAACAGACCACTGGCCTTG	NDUFA5	HGLibA_38752	TGAACAGACCACTGGCCTTG	27	NDUFA5	1
CGCATACCCCGATGATGTCC	NFATC2	HGLibA_39063	CGCATACCCCGATGATGTCC	27	NFATC2	1
ACAGAGAAATGATATCGCCA	NFYC	HGLibA_39149	ACAGAGAAATGATATCGCCA	27	NFYC	1
TATGACCCTGTTACATTGCC	NonTargetingControlGuideForHuman_0696	HGLibA_65079	TATGACCCTGTTACATTGCC	27	NonTargetingControlGuideForHuman_0696	1
AGCGGCGGGCATACCATTGC	OPALIN	HGLibA_40697	AGCGGCGGGCATACCATTGC	27	OPALIN	1
TCATCAGCGGAGGTACAAGT	OR51A2	HGLibA_41360	TCATCAGCGGAGGTACAAGT	27	OR51A2	1
GTATGACGCCGTTCTCCATG	PAPL	HGLibA_42417	GTATGACGCCGTTCTCCATG	27	PAPL	1
AGTTGCCCAGATGTCGTTGC	PDCD7	HGLibA_43032	AGTTGCCCAGATGTCGTTGC	27	PDCD7	1
CCGAGACCACGCAATCTGCA	PLGRKT	HGLibA_44454	CCGAGACCACGCAATCTGCA	27	PLGRKT	1
TTGACCTGACAGTGTTACAG	POLR1E	HGLibA_44849	TTGACCTGACAGTGTTACAG	27	POLR1E	1
GTCAGAATAGCGCTGCGTTG	POSTN	HGLibA_44999	GTCAGAATAGCGCTGCGTTG	27	POSTN	1
CTTGCTGCTCCCCCTGCACC	POTEG	HGLibA_45022	CTTGCTGCTCCCCCTGCACC	27	POTEG	1
CCATGAATGATACAACCGTG	PRLR	HGLibA_45893	CCATGAATGATACAACCGTG	27	PRLR	1
TAGCACACCTCCTGCGCCGT	REXO1	HGLibA_48179	TAGCACACCTCCTGCGCCGT	27	REXO1	1
AGAGTGTCCGAATCCTGTCC	RIC8A	HGLibA_48524	AGAGTGTCCGAATCCTGTCC	27	RIC8A	1
TTCCTTACAGAGTTTATCAT	RPS25	HGLibA_49405	TTCCTTACAGAGTTTATCAT	27	RPS25	1
GCATGCAAGTGCGATTGCCA	RS1	HGLibA_49582	GCATGCAAGTGCGATTGCCA	27	RS1	1
GCAGCTCCATGGCCGATGCC	SLC22A6	HGLibA_51883	GCAGCTCCATGGCCGATGCC	27	SLC22A6	1
AGCCGGCTCACCCAGTGAAA	SOBP	HGLibA_53408	AGCCGGCTCACCCAGTGAAA	27	SOBP	1
CTGAAGTCGGCGTGCTCCTC	TGIF2LX	HGLibA_56535	CTGAAGTCGGCGTGCTCCTC	27	TGIF2LX	1
ACGACTCTTCCGTCAAAGCC	THG1L	HGLibA_56644	ACGACTCTTCCGTCAAAGCC	27	THG1L	1
ACACACGGTGTCCGAGGTCT	TNFRSF1B	HGLibA_58064	ACACACGGTGTCCGAGGTCT	27	TNFRSF1B	1
CGAACTAGTCGGTTCAGGAA	TNFSF12-TNFSF13	HGLibA_58092	CGAACTAGTCGGTTCAGGAA	27	TNFSF12-TNFSF13	1
TTCAGCCCCTCTCGTACGAC	TXNDC17	HGLibA_59705	TTCAGCCCCTCTCGTACGAC	27	TXNDC17	1
AATAGCCGTCCAATTCTTTG	WDR49	HGLibA_61401	AATAGCCGTCCAATTCTTTG	27	WDR49	1
CTGCTCCTTGGTACGCAGCT	ZNF213	HGLibA_62880	CTGCTCCTTGGTACGCAGCT	27	ZNF213	1
AAGTCCCCTCTGCCCGTCAC	ZNF646	HGLibA_63741	AAGTCCCCTCTGCCCGTCAC	27	ZNF646	1
AGATTGTGAAAGTGTCAATG	ZNF99	HGLibA_64205	AGATTGTGAAAGTGTCAATG	27	ZNF99	1
CACCAAGTGCTCGTCCAACT	USP17L11	HGLibA_60507	CACCAAGTGCTCGTCCAACT	26	USP17L11	3
TGGCCCTGCACTTGTACAGC	ARID2	HGLibA_02887	TGGCCCTGCACTTGTACAGC	26	ARID2	2
TGGCAGCGACGAAGCCGAGC	FAM134B	HGLibA_16126	TGGCAGCGACGAAGCCGAGC	26	FAM134B	2
TCCCCGGGCAGGTCATTAAC	IQCE	HGLibA_30786	TCCCCGGGCAGGTCATTAAC	26	IQCE	2
AGTGCTGTTATTCACTGTCG	KHSRP	HGLibA_31868	AGTGCTGTTATTCACTGTCG	26	KHSRP	2
CCCCACAGAAGAGCCGAGTA	KLK9	HGLibA_32562	CCCCACAGAAGAGCCGAGTA	26	KLK9	2
CCACTAGGTGGTCCGCGCAA	PAM16	HGLibA_42372	CCACTAGGTGGTCCGCGCAA	26	PAM16	2
CGAGATCATCGACCGGTGCC	C1orf198	HGLibA_05818	CGAGATCATCGACCGGTGCC	26	C1orf198	1
GAGTCATTGCCTTCGACTGC	CACNA2D3	HGLibA_06910	GAGTCATTGCCTTCGACTGC	26	CACNA2D3	1
AGCCTGAATCAGTATACACG	CCBL2	HGLibA_07498	AGCCTGAATCAGTATACACG	26	CCBL2	1
AGCTACTATGCTGAACCTTC	CD274	HGLibA_08318	AGCTACTATGCTGAACCTTC	26	CD274	1
GGCCGCACGCGCGCCGAATC	CDKN2A	HGLibA_08830	GGCCGCACGCGCGCCGAATC	26	CDKN2A	1
CTCCGTAGCTGGTCTGACTT	CGGBP1	HGLibA_09318	CTCCGTAGCTGGTCTGACTT	26	CGGBP1	1
CAGCTCCCCCACGGATCGTG	DFNB31	HGLibA_13027	CAGCTCCCCCACGGATCGTG	26	DFNB31	1
AATGTGTAGGACCATCGTGC	DGUOK	HGLibA_13087	AATGTGTAGGACCATCGTGC	26	DGUOK	1
TCACGCTGACCACGTTCTCC	DNAH1	HGLibA_13468	TCACGCTGACCACGTTCTCC	26	DNAH1	1
ATACTTACCTTAACTCCCTT	DPPA3	HGLibA_13890	ATACTTACCTTAACTCCCTT	26	DPPA3	1
AAGTGCAGCGCTATGACGGC	DUOX2	HGLibA_14099	AAGTGCAGCGCTATGACGGC	26	DUOX2	1
TACAGAAACTATGTTGTCCC	ENTHD1	HGLibA_15190	TACAGAAACTATGTTGTCCC	26	ENTHD1	1
GAAACAACAGAAGAAACAAG	GOLGA8B	HGLibA_19642	GAAACAACAGAAGAAACAAG	26	GOLGA8B	1
CCTCCAAGTCAGCTTTTCTT	hsa-mir-4667	HGLibA_25840	CCTCCAAGTCAGCTTTTCTT	26	hsa-mir-4667	1
CCCATGCTGTGACCCTCTAG	hsa-mir-518d	HGLibA_26720	CCCATGCTGTGACCCTCTAG	26	hsa-mir-518d	1
GAACAGGTTGAAGTGTGCCG	hsa-mir-595	HGLibA_27528	GAACAGGTTGAAGTGTGCCG	26	hsa-mir-595	1
CCCCTCTCTGTCCCACCCAT	hsa-mir-6769b	HGLibA_28297	CCCCTCTCTGTCCCACCCAT	26	hsa-mir-6769b	1
CTTCCTCCTCCCCAGGCCGA	hsa-mir-7107	HGLibA_28841	CTTCCTCCTCCCCAGGCCGA	26	hsa-mir-7107	1
AGATGTTTTAAGGACACTGA	hsa-mir-7856	HGLibA_29068	AGATGTTTTAAGGACACTGA	26	hsa-mir-7856	1
GCTAGCTTCACATTATTACT	KPNB1	HGLibA_32663	GCTAGCTTCACATTATTACT	26	KPNB1	1
TCCCACTGTGGACCTGAACC	KRT33A	HGLibA_32768	TCCCACTGTGGACCTGAACC	26	KRT33A	1
GCAGGTCCGAGTAGACGCGC	MANEAL	HGLibA_35381	GCAGGTCCGAGTAGACGCGC	26	MANEAL	1
GTATACCTCACTTCTCGCAA	NNAT	HGLibA_39509	GTATACCTCACTTCTCGCAA	26	NNAT	1
GTGTCTCGACCTTGCCTGAA	NOTCH2NL	HGLibA_39635	GTGTCTCGACCTTGCCTGAA	26	NOTCH2NL	1
CTTCCAAGTTCCCACCGCCC	OBP2A	HGLibA_40513	CTTCCAAGTTCCCACCGCCC	26	OBP2A	1
GTATGTAGTCAATCTCCCGT	OLFML1	HGLibA_40644	GTATGTAGTCAATCTCCCGT	26	OLFML1	1
CGAGCGCTGGAATGTCGTGC	OMP	HGLibA_40676	CGAGCGCTGGAATGTCGTGC	26	OMP	1
CGACAAGTTCCACCAGCACG	ONECUT3	HGLibA_40687	CGACAAGTTCCACCAGCACG	26	ONECUT3	1
ATTCCATAAGAATCTGTAGT	RFWD2	HGLibA_48243	ATTCCATAAGAATCTGTAGT	26	RFWD2	1
TACACTCACCCGGCTGGCAC	SAPCD2	HGLibA_50021	TACACTCACCCGGCTGGCAC	26	SAPCD2	1
ACCTCCACTTCGGAAGATCA	SEMA3G	HGLibA_50626	ACCTCCACTTCGGAAGATCA	26	SEMA3G	1
CGTCATGACTCCCTTCGATG	SLC25A34	HGLibA_52001	CGTCATGACTCCCTTCGATG	26	SLC25A34	1
GCTGTTTCATGCTTCATTAT	SLC9A7	HGLibA_52713	GCTGTTTCATGCTTCATTAT	26	SLC9A7	1
CTTGGGCTTCTGGTTATTGT	SSR1	HGLibA_54442	CTTGGGCTTCTGGTTATTGT	26	SSR1	1
TTGACCATCCTCTTCTACAG	TMEM245	HGLibA_57588	TTGACCATCCTCTTCTACAG	26	TMEM245	1
AAAAGTCCAAGCATAGCAAC	TOP1	HGLibA_58277	AAAAGTCCAAGCATAGCAAC	26	TOP1	1
TGTAAAACTTATGATCTTCC	UFL1	HGLibA_60137	TGTAAAACTTATGATCTTCC	26	UFL1	1
AACAGCAGCATTGATCGTTT	USP6	HGLibA_60691	AACAGCAGCATTGATCGTTT	26	USP6	1
GGTAGTTGAATTCGCTTGTG	ZBTB39	HGLibA_62162	GGTAGTTGAATTCGCTTGTG	26	ZBTB39	1
TGAATTACAGCTTCGCCTTT	ZFC3H1	HGLibA_62457	TGAATTACAGCTTCGCCTTT	26	ZFC3H1	1
TCACCTGGGCAGCTCTGACG	ZNF585A	HGLibA_63609	TCACCTGGGCAGCTCTGACG	26	ZNF585A	1
ATCAAACTTTGAGTCACGTC	ZNF616	HGLibA_63682	ATCAAACTTTGAGTCACGTC	26	ZNF616	1
CTCACCATTGCGTCCATGAA	ANKH	HGLibA_01962	CTCACCATTGCGTCCATGAA	26
ATGCTGTAGCTTGTGCAAAG	LYZ	HGLibA_35071	ATGCTGTAGCTTGTGCAAAG	26
GGACGATGCTACTCACGATG	ZNF541	HGLibA_63479	GGACGATGCTACTCACGATG	26
CCCCGAGGTCGACGACCTCC	ARMC6	HGLibA_03026	CCCCGAGGTCGACGACCTCC	25	ARMC6	2
CTGTCGTAGTGATACCGTAA	C3orf37	HGLibA_06238	CTGTCGTAGTGATACCGTAA	25	C3orf37	2
CTGCTACCTGCAGCGCCGTG	FBXL8	HGLibA_17022	CTGCTACCTGCAGCGCCGTG	25	FBXL8	2
TGACCGTTGACTGTACCTTG	hsa-mir-181a-2	HGLibA_23018	TGACCGTTGACTGTACCTTG	25	hsa-mir-181a-2	2
CACTGCTTGACTGAACATTA	ACRC	HGLibA_00535	CACTGCTTGACTGAACATTA	25	ACRC	1
CGCGTCTTGTTTCTGCTCAG	ADAM2	HGLibA_00749	CGCGTCTTGTTTCTGCTCAG	25	ADAM2	1
ACCCTCCCACACATGATATC	ADAM20	HGLibA_00753	ACCCTCCCACACATGATATC	25	ADAM20	1
CATCGTACATGTACTGCCCT	AGXT2L2	HGLibA_01280	CATCGTACATGTACTGCCCT	25	AGXT2L2	1
TTACTCTGTCAACGTGATAG	AKAP6	HGLibA_01440	TTACTCTGTCAACGTGATAG	25	AKAP6	1
GCATCTTAATCCAGACCAGT	CAPRIN2	HGLibA_07194	GCATCTTAATCCAGACCAGT	25	CAPRIN2	1
TGGACTCACGTGGTGCAGAG	CCL3L1	HGLibA_08021	TGGACTCACGTGGTGCAGAG	25	CCL3L1	1
ATGACGTCCCGTATGCGTCT	CCNL2	HGLibA_08119	ATGACGTCCCGTATGCGTCT	25	CCNL2	1
AGAGCACTCCGAAGTTGTTG	CD53	HGLibA_08409	AGAGCACTCCGAAGTTGTTG	25	CD53	1
TGTTTATACTCCGAGCCCAC	DMGDH	HGLibA_13406	TGTTTATACTCCGAGCCCAC	25	DMGDH	1
CACACCTAGACCGTCGCGAG	EAF2	HGLibA_14337	CACACCTAGACCGTCGCGAG	25	EAF2	1
CCCATTGACGGCAGGATCGC	ETV7	HGLibA_15668	CCCATTGACGGCAGGATCGC	25	ETV7	1
GCAGCGCTCCAGTATTGCTG	FAM159B	HGLibA_16201	GCAGCGCTCCAGTATTGCTG	25	FAM159B	1
ATGCTGAAGATGCTACCGAA	GPATCH8	HGLibA_19749	ATGCTGAAGATGCTACCGAA	25	GPATCH8	1
GTGGAGCACCACCCGCACCT	GRB10	HGLibA_20224	GTGGAGCACCACCCGCACCT	25	GRB10	1
GGAGATCGACTACTCGGCCG	HNRNPLL	HGLibA_21837	GGAGATCGACTACTCGGCCG	25	HNRNPLL	1
GGCGTGGTGGTGGGGGCCTG	hsa-mir-1268a	HGLibA_22549	GGCGTGGTGGTGGGGGCCTG	25	hsa-mir-1268a	1
GTGCTCAGTGTCTTTATAAC	hsa-mir-1272	HGLibA_22583	GTGCTCAGTGTCTTTATAAC	25	hsa-mir-1272	1
TGTGTGGCAGATAGGGCACT	hsa-mir-378g	HGLibA_24509	TGTGTGGCAGATAGGGCACT	25	hsa-mir-378g	1
CACAGAGCTGATGTGGATCT	hsa-mir-4527	HGLibA_25623	CACAGAGCTGATGTGGATCT	25	hsa-mir-4527	1
CGGCTCAGCCCAGATCAGCC	hsa-mir-4538	HGLibA_25666	CGGCTCAGCCCAGATCAGCC	25	hsa-mir-4538	1
CTGCGACCCCCTTATGTTGC	INHBE	HGLibA_30597	CTGCGACCCCCTTATGTTGC	25	INHBE	1
GCAACGTCCGCGTTCTTTAC	LAMTOR5	HGLibA_33289	GCAACGTCCGCGTTCTTTAC	25	LAMTOR5	1
TGCTGAGCGTCTCGAAGCGA	LMF1	HGLibA_33972	TGCTGAGCGTCTCGAAGCGA	25	LMF1	1
GTCCGAAGGCGGGCCACCTC	LPCAT4	HGLibA_34368	GTCCGAAGGCGGGCCACCTC	25	LPCAT4	1
CATTGTAGCGCGCCTTCTTC	MDK	HGLibA_35980	CATTGTAGCGCGCCTTCTTC	25	MDK	1
TACTTAGCGCCCTCCGTTGA	MFSD6L	HGLibA_36398	TACTTAGCGCCCTCCGTTGA	25	MFSD6L	1
TGTCTTCGAGAATAACCGTT	MICALL1	HGLibA_36500	TGTCTTCGAGAATAACCGTT	25	MICALL1	1
TCGCAGAAACACCACCAGTT	MICU3	HGLibA_36517	TCGCAGAAACACCACCAGTT	25	MICU3	1
GGTGTCTCCTGCGCCTGCAC	MT1M	HGLibA_37582	GGTGTCTCCTGCGCCTGCAC	25	MT1M	1
AGCGCTACCTCTTTAGAACT	NAPEPLD	HGLibA_38421	AGCGCTACCTCTTTAGAACT	25	NAPEPLD	1
CCAGTCCGACGTCATGATCG	NDUFS7	HGLibA_38851	CCAGTCCGACGTCATGATCG	25	NDUFS7	1
TACAGCGGAGACGAAAATTG	NHS	HGLibA_39202	TACAGCGGAGACGAAAATTG	25	NHS	1
GATCCTGCGTTCCCGATTTC	PBX1	HGLibA_42630	GATCCTGCGTTCCCGATTTC	25	PBX1	1
TGTATACAGTACCTGTATGC	PEX3	HGLibA_43402	TGTATACAGTACCTGTATGC	25	PEX3	1
ACGCCGACATCCGCAGCTTC	PGPEP1L	HGLibA_43570	ACGCCGACATCCGCAGCTTC	25	PGPEP1L	1
TCACAACCAATTGTTGCTCC	PHF6	HGLibA_43673	TCACAACCAATTGTTGCTCC	25	PHF6	1
ATGTTATCTGATTGCACCAA	PPAPDC1A	HGLibA_45113	ATGTTATCTGATTGCACCAA	25	PPAPDC1A	1
AGAGACGCCACTGTCATATC	RBCK1	HGLibA_47737	AGAGACGCCACTGTCATATC	25	RBCK1	1
ATTGCCTGTGAATGCCGTCC	SCUBE3	HGLibA_50363	ATTGCCTGTGAATGCCGTCC	25	SCUBE3	1
CAGCCGCCGAAAGGAGACCA	SH2D5	HGLibA_51193	CAGCCGCCGAAAGGAGACCA	25	SH2D5	1
TCAGGCACTCGCCAATGTCC	SLC25A23	HGLibA_51966	TCAGGCACTCGCCAATGTCC	25	SLC25A23	1
GCCAGCCCCGCCGAACCATG	SLC35F1	HGLibA_52290	GCCAGCCCCGCCGAACCATG	25	SLC35F1	1
GCGCTGGCTTCGGCATTGAC	SUGP1	HGLibA_55005	GCGCTGGCTTCGGCATTGAC	25	SUGP1	1
GGATCCAATCTGTGCCCATC	SULT2A1	HGLibA_55047	GGATCCAATCTGTGCCCATC	25	SULT2A1	1
TGAACGGGAGATCCATCTTT	TET1	HGLibA_56324	TGAACGGGAGATCCATCTTT	25	TET1	1
ACCAGCATTCGCCCATCTCA	TRUB2	HGLibA_59093	ACCAGCATTCGCCCATCTCA	25	TRUB2	1
CCCCTTCTGCATCTTCCGAC	ZBTB12	HGLibA_62108	CCCCTTCTGCATCTTCCGAC	25	ZBTB12	1
TATCCATCCGAGTCATCACC	ZC3H12B	HGLibA_62243	TATCCATCCGAGTCATCACC	25	ZC3H12B	1
TTCGTCATAACTGTAAGCGC	ZNF311	HGLibA_63067	TTCGTCATAACTGTAAGCGC	25	ZNF311	1
CACGTATTCGCCCGTCCCTC	BEST4	HGLibA_04427	CACGTATTCGCCCGTCCCTC	24	BEST4	2
ATCACATTGTACGTGAGCAC	GPR148	HGLibA_19921	ATCACATTGTACGTGAGCAC	24	GPR148	2
CTGCTCAACGCCCACTCTAA	MYEOV	HGLibA_37979	CTGCTCAACGCCCACTCTAA	24	MYEOV	2
CGTAATGCTCCATCACCTCT	TADA2B	HGLibA_55478	CGTAATGCTCCATCACCTCT	24	TADA2B	2
CTTCTGTCGCGAAGCAGCGC	ZNF536	HGLibA_63474	CTTCTGTCGCGAAGCAGCGC	24	ZNF536	2
ATATATTGATGCCCAGTTCG	42624	HGLibA_50718	ATATATTGATGCCCAGTTCG	24	42624	1
CAGTGTAAGCCCCCCATTGT	ADAMTS8	HGLibA_00842	CAGTGTAAGCCCCCCATTGT	24	ADAMTS8	1
GATGTGCACTTCGTGATTAT	ARPC1A	HGLibA_03075	GATGTGCACTTCGTGATTAT	24	ARPC1A	1
GACGAGACGTCCTTCGAAGC	ASIC1	HGLibA_03299	GACGAGACGTCCTTCGAAGC	24	ASIC1	1
CTGCTGGATGTTCGTCAGTT	C22orf23	HGLibA_06056	CTGCTGGATGTTCGTCAGTT	24	C22orf23	1
CCCTGAGCGCTGCCTCATCG	CCS	HGLibA_08183	CCCTGAGCGCTGCCTCATCG	24	CCS	1
GCAACAACGCCAACGTCACC	CD79A	HGLibA_08448	GCAACAACGCCAACGTCACC	24	CD79A	1
TTTACTCGATGATGGAACTC	CDC123	HGLibA_08507	TTTACTCGATGATGGAACTC	24	CDC123	1
GGGCACCCTGCACCGCCATC	CDK16	HGLibA_08743	GGGCACCCTGCACCGCCATC	24	CDK16	1
TGCAGATACGCTGCATCCGC	CSF3R	HGLibA_11342	TGCAGATACGCTGCATCCGC	24	CSF3R	1
CTGCCAGGCTGCATATGACA	DNAJC17	HGLibA_13584	CTGCCAGGCTGCATATGACA	24	DNAJC17	1
CCTCACCGATGTCATTCATC	ECHDC2	HGLibA_14397	CCTCACCGATGTCATTCATC	24	ECHDC2	1
TGATAATACGTCAAGTGCAG	FANCB	HGLibA_16833	TGATAATACGTCAAGTGCAG	24	FANCB	1
GTACCACACTACTACATCTG	GREB1L	HGLibA_20238	GTACCACACTACTACATCTG	24	GREB1L	1
CCAGATAACAGCAGCCCCAC	hsa-mir-194-2	HGLibA_23137	CCAGATAACAGCAGCCCCAC	24	hsa-mir-194-2	1
CTGCAGCATGACATGGGATT	hsa-mir-3976	HGLibA_24719	CTGCAGCATGACATGGGATT	24	hsa-mir-3976	1
CGTTTCAAAGTTCTCACTTT	hsa-mir-4434	HGLibA_25179	CGTTTCAAAGTTCTCACTTT	24	hsa-mir-4434	1
AGTGTTTCACTTGCTACCCT	hsa-mir-7848	HGLibA_29036	AGTGTTTCACTTGCTACCCT	24	hsa-mir-7848	1
AGGTGTACCACGGTTCATGA	hsa-mir-938	HGLibA_29381	AGGTGTACCACGGTTCATGA	24	hsa-mir-938	1
CCTCCGAGTTGACCGCCTGC	KDELC2	HGLibA_31763	CCTCCGAGTTGACCGCCTGC	24	KDELC2	1
GCACCACTAGCCCCACGCAC	KHK	HGLibA_31864	GCACCACTAGCCCCACGCAC	24	KHK	1
TGTCCCCACAGTCGTTCTGT	LDLRAD4	HGLibA_33538	TGTCCCCACAGTCGTTCTGT	24	LDLRAD4	1
AGAGCCATACTGCGTTATAG	LY6K	HGLibA_34965	AGAGCCATACTGCGTTATAG	24	LY6K	1
TTGTTATGAACAACGAACAA	METTL21D	HGLibA_36274	TTGTTATGAACAACGAACAA	24	METTL21D	1
AGAGGGGTCGGGACCACTCA	MGST1	HGLibA_36463	AGAGGGGTCGGGACCACTCA	24	MGST1	1
TTCTTACCAGCTTACTAAAA	MLLT10	HGLibA_36700	TTCTTACCAGCTTACTAAAA	24	MLLT10	1
CATGCATTTACCTAGAGGTC	MORF4L1	HGLibA_36947	CATGCATTTACCTAGAGGTC	24	MORF4L1	1
CAAGGCGACGGCCTCGCCCT	NPDC1	HGLibA_39714	CAAGGCGACGGCCTCGCCCT	24	NPDC1	1
AGGAGCAGATCCTTCGTACC	PAGR1	HGLibA_42308	AGGAGCAGATCCTTCGTACC	24	PAGR1	1
TCCCGATCACTTCCAAACTT	PPBP	HGLibA_45144	TCCCGATCACTTCCAAACTT	24	PPBP	1
CCTACTTCTGTGATTGTGAC	PTPLA	HGLibA_46703	CCTACTTCTGTGATTGTGAC	24	PTPLA	1
GCGTACTTCCGTAGAGTGTC	RBFOX2	HGLibA_47745	GCGTACTTCCGTAGAGTGTC	24	RBFOX2	1
GTCTACTCACCGCTGCCGCA	RNASEH2C	HGLibA_48720	GTCTACTCACCGCTGCCGCA	24	RNASEH2C	1
CAACGTTACACCACCTGCTA	RNF19A	HGLibA_48890	CAACGTTACACCACCTGCTA	24	RNF19A	1
CTCTCATGACCGCGTAGCGC	SLCO4A1	HGLibA_52756	CTCTCATGACCGCGTAGCGC	24	SLCO4A1	1
GTTCCGGTCCAAATTAGACC	SP4	HGLibA_53590	GTTCCGGTCCAAATTAGACC	24	SP4	1
TGCCACCATTATCAATGAAG	SRP54	HGLibA_54294	TGCCACCATTATCAATGAAG	24	SRP54	1
GGAGCCAGTTTGCCATTCGC	TOMM7	HGLibA_58266	GGAGCCAGTTTGCCATTCGC	24	TOMM7	1
GGCGGCTAATGTCATAGGTG	VEZF1	HGLibA_60914	GGCGGCTAATGTCATAGGTG	24	VEZF1	1
CATAAGAAGCGGAAGTGCCC	VPS72	HGLibA_61104	CATAAGAAGCGGAAGTGCCC	24	VPS72	1
TTGAGAATGTGGCGCCCGTC	WRAP73	HGLibA_61691	TTGAGAATGTGGCGCCCGTC	24	WRAP73	1
TACATAGTCATTCCTAGTGC	XPO6	HGLibA_61860	TACATAGTCATTCCTAGTGC	24	XPO6	1
TCATCTGGCTGGGTAACTTC	ZNF624	HGLibA_63703	TCATCTGGCTGGGTAACTTC	24	ZNF624	1
AATTCTGCTGAGCGTGATCC	ZNF679	HGLibA_63808	AATTCTGCTGAGCGTGATCC	24	ZNF679	1
TTGGAATTGCACTTTAGCAA	hsa-mir-367	HGLibA_24284	TTGGAATTGCACTTTAGCAA	23	hsa-mir-367	2
AAATTCTACAACATCTCGAC	PPP1R13B	HGLibA_45317	AAATTCTACAACATCTCGAC	23	PPP1R13B	2
AACATACCTGGTGTGGTCAC	TRAT1	HGLibA_58629	AACATACCTGGTGTGGTCAC	23	TRAT1	2
TAACCCTGCCCACACAACCT	AFM	HGLibA_01121	TAACCCTGCCCACACAACCT	23	AFM	1
CTTGGCCTCGGTGCCGTCGC	BCL7A	HGLibA_04339	CTTGGCCTCGGTGCCGTCGC	23	BCL7A	1
GATCACTTGTGTTGAAACAG	BTK	HGLibA_04954	GATCACTTGTGTTGAAACAG	23	BTK	1
TGAGCTCCGGGATTATCGAA	C9orf135	HGLibA_06679	TGAGCTCCGGGATTATCGAA	23	C9orf135	1
CCTGTTGCGTTTAGGCACCC	C9orf37	HGLibA_06726	CCTGTTGCGTTTAGGCACCC	23	C9orf37	1
AAGCTATTGTACAGTTTACA	CCZ1	HGLibA_08222	AAGCTATTGTACAGTTTACA	23	CCZ1	1
CGCCAAAGTCTATGAGCAGC	CDR2L	HGLibA_08870	CGCCAAAGTCTATGAGCAGC	23	CDR2L	1
CCGGACCGTCAGCAAGATCC	CIC	HGLibA_09694	CCGGACCGTCAGCAAGATCC	23	CIC	1
AAGGGCCATGGCCACCGTGC	DEPDC7	HGLibA_12987	AAGGGCCATGGCCACCGTGC	23	DEPDC7	1
TAGCTACATGTATCAGACAG	DPH6	HGLibA_13852	TAGCTACATGTATCAGACAG	23	DPH6	1
AGTCGATGAGACGCACGTAG	EBF4	HGLibA_14358	AGTCGATGAGACGCACGTAG	23	EBF4	1
TCATCAACGTCACCGCGACT	EDEM3	HGLibA_14459	TCATCAACGTCACCGCGACT	23	EDEM3	1
CCCTTGGACAGACATACCTA	ETFDH	HGLibA_15627	CCCTTGGACAGACATACCTA	23	ETFDH	1
GTGCTGACCACCCAAACAAT	GIN1	HGLibA_19097	GTGCTGACCACCCAAACAAT	23	GIN1	1
TATCATCCAGCGGAACCGCA	GYS1	HGLibA_20708	TATCATCCAGCGGAACCGCA	23	GYS1	1
CTGGGCACGTCCCCTCCCCT	hsa-mir-181d	HGLibA_23031	CTGGGCACGTCCCCTCCCCT	23	hsa-mir-181d	1
GCTTTGCCCGCTTTCTGAGC	hsa-mir-4315-1	HGLibA_25031	GCTTTGCCCGCTTTCTGAGC	23	hsa-mir-4315-1	1
TTCCATAGGTGATGAGTCAC	hsa-mir-587	HGLibA_27500	TTCCATAGGTGATGAGTCAC	23	hsa-mir-587	1
CTTGGGCCTGGGATGGGGAC	hsa-mir-6810	HGLibA_28470	CTTGGGCCTGGGATGGGGAC	23	hsa-mir-6810	1
TTAGGAACTATACTCAACTC	IFRD1	HGLibA_30026	TTAGGAACTATACTCAACTC	23	IFRD1	1
CCAATACAGAATACTCCACC	LIN28A	HGLibA_33847	CCAATACAGAATACTCCACC	23	LIN28A	1
GGGTTGATGCACTCGGATGC	LRRC55	HGLibA_34676	GGGTTGATGCACTCGGATGC	23	LRRC55	1
GTTGCAACAGATATTCATCT	MRE11A	HGLibA_37110	GTTGCAACAGATATTCATCT	23	MRE11A	1
ATGCCCTCGTTCTCGTCTAG	MVP	HGLibA_37890	ATGCCCTCGTTCTCGTCTAG	23	MVP	1
ATTCTCCCCCACATAGAGTC	NLRP3	HGLibA_39407	ATTCTCCCCCACATAGAGTC	23	NLRP3	1
GACGCCCTAATGCCCATCGT	NonTargetingControlGuideForHuman_0335	HGLibA_64718	GACGCCCTAATGCCCATCGT	23	NonTargetingControlGuideForHuman_0335	1
CAAGGCTGTCGAAATGAGCT	NUP107	HGLibA_40307	CAAGGCTGTCGAAATGAGCT	23	NUP107	1
CTCACACTTTGCGGTCATTG	PABPC4	HGLibA_42225	CTCACACTTTGCGGTCATTG	23	PABPC4	1
GATCAGCACGACACGCATCC	PCDHA12	HGLibA_42722	GATCAGCACGACACGCATCC	23	PCDHA12	1
CTCCTCCAGGTTCACCGACG	PDE2A	HGLibA_43067	CTCCTCCAGGTTCACCGACG	23	PDE2A	1
TTCACAGAGTTACATCCATA	PIGF	HGLibA_43840	TTCACAGAGTTACATCCATA	23	PIGF	1
GAATTAGCCTTGAAATTAGC	PKIA	HGLibA_44108	GAATTAGCCTTGAAATTAGC	23	PKIA	1
GATGTAGTTTAATCCGACTA	PTPN1	HGLibA_46718	GATGTAGTTTAATCCGACTA	23	PTPN1	1
GCGAACATGAAGTCCGGTCC	SLC25A2	HGLibA_51953	GCGAACATGAAGTCCGGTCC	23	SLC25A2	1
GCTCCAGCTCGTCTTCGTTC	SORBS3	HGLibA_53468	GCTCCAGCTCGTCTTCGTTC	23	SORBS3	1
AGCAAAGTGACCATCCCGAT	SORD	HGLibA_53479	AGCAAAGTGACCATCCCGAT	23	SORD	1
GCTCATTGTTGAATCGTTTG	SPTLC3	HGLibA_54187	GCTCATTGTTGAATCGTTTG	23	SPTLC3	1
TGGCCCGCTAGTGCCTGACT	STAMBP	HGLibA_54624	TGGCCCGCTAGTGCCTGACT	23	STAMBP	1
GGCCATTGTGTACCGTCCTA	TGM3	HGLibA_56546	GGCCATTGTGTACCGTCCTA	23	TGM3	1
GACCAGAGATGTTATCAATG	TMC1	HGLibA_57036	GACCAGAGATGTTATCAATG	23	TMC1	1
CGACTTCACGCCGCCAGCAT	TSHZ1	HGLibA_59151	CGACTTCACGCCGCCAGCAT	23	TSHZ1	1
CGGCAGAGGACACCGCGTAC	WNT9B	HGLibA_61686	CGGCAGAGGACACCGCGTAC	23	WNT9B	1
AACTGCTGGAGCATAGTCCC	ZMYND10	HGLibA_62700	AACTGCTGGAGCATAGTCCC	23	ZMYND10	1
TTAATCTGAACTGATGAGTC	ZNF106	HGLibA_62726	TTAATCTGAACTGATGAGTC	23	ZNF106	1
CGCGGTGACCTTTGACGACG	ZNF778	HGLibA_64017	CGCGGTGACCTTTGACGACG	23	ZNF778	1
CAGCACCATTCTGGGGTACG	hsa-mir-412	HGLibA_24741	CAGCACCATTCTGGGGTACG	22	hsa-mir-412	2
ATGGCTTCTCTTGCACACCC	hsa-mir-6815	HGLibA_28491	ATGGCTTCTCTTGCACACCC	22	hsa-mir-6815	2
TATTGCGGACCAGGTCCGCC	PNMA2	HGLibA_44656	TATTGCGGACCAGGTCCGCC	22	PNMA2	2
TCCCATACCGGATACATTCC	YLPM1	HGLibA_61984	TCCCATACCGGATACATTCC	22	YLPM1	2
TCGCTCAGCAGAATTTGTAC	ZNF195	HGLibA_62846	TCGCTCAGCAGAATTTGTAC	22	ZNF195	2
CGACGACATGATCCGCTCAA	ABCD1	HGLibA_00191	CGACGACATGATCCGCTCAA	22	ABCD1	1
CGTGGCTGCGAATGATCTTG	ADORA2A	HGLibA_01014	CGTGGCTGCGAATGATCTTG	22	ADORA2A	1
GCGCAGCACGCGCAGTATGT	BRSK2	HGLibA_04852	GCGCAGCACGCGCAGTATGT	22	BRSK2	1
TCTCTCCAAAATTCCATGCA	C12orf5	HGLibA_05256	TCTCTCCAAAATTCCATGCA	22	C12orf5	1
CCCCGGAGGTTCGCGGCGAG	C15orf56	HGLibA_05417	CCCCGGAGGTTCGCGGCGAG	22	C15orf56	1
TGAGTATAGGATCAAACCAG	C1orf21	HGLibA_05825	TGAGTATAGGATCAAACCAG	22	C1orf21	1
GGCTCCCGCACAATGTCACC	CERS6	HGLibA_09214	GGCTCCCGCACAATGTCACC	22	CERS6	1
ATATGGAAGCCTCTCATAAT	CWF19L1	HGLibA_11824	ATATGGAAGCCTCTCATAAT	22	CWF19L1	1
GGTGCCCAACGCTTGCGAGC	DAND5	HGLibA_12307	GGTGCCCAACGCTTGCGAGC	22	DAND5	1
CGCCATCCTCGAAGAGCTTT	DGKA	HGLibA_13058	CGCCATCCTCGAAGAGCTTT	22	DGKA	1
TCGGACTGCTCCTGAGACGA	DMRTB1	HGLibA_13431	TCGGACTGCTCCTGAGACGA	22	DMRTB1	1
GTGGGCCTTCGCCAACAACT	DPP7	HGLibA_13879	GTGGGCCTTCGCCAACAACT	22	DPP7	1
AAAAACGTACTTTGAGTCAC	ESCO1	HGLibA_15556	AAAAACGTACTTTGAGTCAC	22	ESCO1	1
GCCTTCCAGTGTTCATCCGC	F10	HGLibA_15841	GCCTTCCAGTGTTCATCCGC	22	F10	1
CACTTTGGACCCAGCGGTGA	FABP1	HGLibA_15908	CACTTTGGACCCAGCGGTGA	22	FABP1	1
TGACTATGTACGCAACATTC	FAM120A	HGLibA_16054	TGACTATGTACGCAACATTC	22	FAM120A	1
CTAAGCCATCTAATGGAGAT	FAM76B	HGLibA_16725	CTAAGCCATCTAATGGAGAT	22	FAM76B	1
CCCCAAGCACTTTGTTCATC	GMEB1	HGLibA_19397	CCCCAAGCACTTTGTTCATC	22	GMEB1	1
CTCTAGCTATCTTAATGACT	GNAQ	HGLibA_19466	CTCTAGCTATCTTAATGACT	22	GNAQ	1
ACCAGACAAGACCGATTCGC	HADH	HGLibA_20804	ACCAGACAAGACCGATTCGC	22	HADH	1
CTGAATCCAGGTGTCTCCAC	hsa-mir-1276	HGLibA_22614	CTGAATCCAGGTGTCTCCAC	22	hsa-mir-1276	1
TGTTACAGCCCACCTGGGTT	hsa-mir-1296	HGLibA_22717	TGTTACAGCCCACCTGGGTT	22	hsa-mir-1296	1
TACCTGCACTATGAGCACTT	hsa-mir-20b	HGLibA_23257	TACCTGCACTATGAGCACTT	22	hsa-mir-20b	1
TGAACATACCTCATCCTTTA	hsa-mir-4280	HGLibA_24878	TGAACATACCTCATCCTTTA	22	hsa-mir-4280	1
ACTAAACTCAGTAATGGTAA	hsa-mir-451a	HGLibA_25577	ACTAAACTCAGTAATGGTAA	22	hsa-mir-451a	1
CTCCCAAGTGCTGGGATTAC	hsa-mir-5095	HGLibA_26591	CTCCCAAGTGCTGGGATTAC	22	hsa-mir-5095	1
GAGGTGGTAGGATGTAGAGC	hsa-mir-6134	HGLibA_27741	GAGGTGGTAGGATGTAGAGC	22	hsa-mir-6134	1
TGGGCATCTTGCATAAACTC	hsa-mir-8074	HGLibA_29192	TGGGCATCTTGCATAAACTC	22	hsa-mir-8074	1
CGACCCGCGAACAGCACGCA	IBA57	HGLibA_29766	CGACCCGCGAACAGCACGCA	22	IBA57	1
GGACCTGCTCTGCGTTGTAC	IFNGR2	HGLibA_30001	GGACCTGCTCTGCGTTGTAC	22	IFNGR2	1
ATGAATTACAGTTTATCGAC	KIAA0146	HGLibA_31883	ATGAATTACAGTTTATCGAC	22	KIAA0146	1
CAGATCCTGCTAAATCCACC	KIF15	HGLibA_32154	CAGATCCTGCTAAATCCACC	22	KIF15	1
TTACCCCAACTGGGTCTTTA	KIF23	HGLibA_32196	TTACCCCAACTGGGTCTTTA	22	KIF23	1
TCTCGACACAGCAGGTCAAG	KRAS	HGLibA_32671	TCTCGACACAGCAGGTCAAG	22	KRAS	1
GGGCGGGAAGTCCGTCACGT	LIF	HGLibA_33761	GGGCGGGAAGTCCGTCACGT	22	LIF	1
AATACTTACTGGTGCTGCCC	MEPE	HGLibA_36193	AATACTTACTGGTGCTGCCC	22	MEPE	1
GTGCATTTGCGAATCTGCAC	MIS12	HGLibA_36591	GTGCATTTGCGAATCTGCAC	22	MIS12	1
ACCTTGGGTTGCGCTCGACG	MSI2	HGLibA_37496	ACCTTGGGTTGCGCTCGACG	22	MSI2	1
CAGACGGTTGGTAAGGACGC	NonTargetingControlGuideForHuman_0288	HGLibA_64671	CAGACGGTTGGTAAGGACGC	22	NonTargetingControlGuideForHuman_0288	1
GTAAAGAAGCGGAAAGGTCC	NonTargetingControlGuideForHuman_0533	HGLibA_64916	GTAAAGAAGCGGAAAGGTCC	22	NonTargetingControlGuideForHuman_0533	1
GTTCATGCACCTGTGCTTAC	NPNT	HGLibA_39785	GTTCATGCACCTGTGCTTAC	22	NPNT	1
TACTGAGGAGGATACCCAAC	PLSCR1	HGLibA_44520	TACTGAGGAGGATACCCAAC	22	PLSCR1	1
CTTCAGAAGAGTGTGATCAT	QTRTD1	HGLibA_47052	CTTCAGAAGAGTGTGATCAT	22	QTRTD1	1
TATGCATCCGTATGAGCTAA	RASGEF1B	HGLibA_47619	TATGCATCCGTATGAGCTAA	22	RASGEF1B	1
TATTACCACTCCGTTTATTC	RFX6	HGLibA_48266	TATTACCACTCCGTTTATTC	22	RFX6	1
TATTACCTGATTGGCTCAGT	RGPD1	HGLibA_48314	TATTACCTGATTGGCTCAGT	22	RGPD1	1
TGATCTCCGCTATGCCGACC	RHOBTB1	HGLibA_48459	TGATCTCCGCTATGCCGACC	22	RHOBTB1	1
CCATAACAGTTCCTCTTCGT	RNF6	HGLibA_48982	CCATAACAGTTCCTCTTCGT	22	RNF6	1
ACTACTTACCAGGGACACCT	RPL10	HGLibA_49141	ACTACTTACCAGGGACACCT	22	RPL10	1
CCCTTGCAATTGAGCATGTC	SHCBP1	HGLibA_51301	CCCTTGCAATTGAGCATGTC	22	SHCBP1	1
GGGGGCCTTACCTTACAACC	SLC25A12	HGLibA_51930	GGGGGCCTTACCTTACAACC	22	SLC25A12	1
GCGCGTGAGCGTCTTGCAGA	SMIM10	HGLibA_53008	GCGCGTGAGCGTCTTGCAGA	22	SMIM10	1
GGGGTTACATGGCCGTAGCG	SOX14	HGLibA_53527	GGGGTTACATGGCCGTAGCG	22	SOX14	1
ACCCACGAGCTGACTTCAAC	STC1	HGLibA_54701	ACCCACGAGCTGACTTCAAC	22	STC1	1
ACGATCTCATGAATCTGTGC	SYK	HGLibA_55237	ACGATCTCATGAATCTGTGC	22	SYK	1
CACCTACATGAGCTTCCGTC	TAS2R4	HGLibA_55686	CACCTACATGAGCTTCCGTC	22	TAS2R4	1
CACTGCCACCGTGTAGAAGT	TMEM106C	HGLibA_57148	CACTGCCACCGTGTAGAAGT	22	TMEM106C	1
CTCCTTGCACTGCAATATAC	TMEM168	HGLibA_57334	CTCCTTGCACTGCAATATAC	22	TMEM168	1
GTCCCTCAAGCTTACCAACC	TMEM214	HGLibA_57503	GTCCCTCAAGCTTACCAACC	22	TMEM214	1
ACTCCGCTTCTCCTGCTCAA	TMSB10	HGLibA_57945	ACTCCGCTTCTCCTGCTCAA	22	TMSB10	1
CTGACTTTACCACAGAATTT	TRAPPC13	HGLibA_58598	CTGACTTTACCACAGAATTT	22	TRAPPC13	1
TCCACCTTCTCTGTGAACCG	TRMT2B	HGLibA_58973	TCCACCTTCTCTGTGAACCG	22	TRMT2B	1
CGAGATCGGCGCCGTGACTC	TSEN34	HGLibA_59122	CGAGATCGGCGCCGTGACTC	22	TSEN34	1
GGGTTCCAGTGTACCGCCAC	UGT1A1	HGLibA_60163	GGGTTCCAGTGTACCGCCAC	22	UGT1A1	1
CTCGCGCAGCTCCTCAATCG	UHRF2	HGLibA_60242	CTCGCGCAGCTCCTCAATCG	22	UHRF2	1
CTGTGCTGCGCTCGATCACG	UNC5A	HGLibA_60301	CTGTGCTGCGCTCGATCACG	22	UNC5A	1
GCTGCGTCTTACATCCAGTC	UQCRC2	HGLibA_60403	GCTGCGTCTTACATCCAGTC	22	UQCRC2	1
CTGAACTTAGTCGGTGCTCT	VCX2	HGLibA_60871	CTGAACTTAGTCGGTGCTCT	22	VCX2	1
CTCACCGACTGCACAACGCC	WNT10B	HGLibA_61638	CTCACCGACTGCACAACGCC	22	WNT10B	1
TCTTACCCAGGTGGCATGCC	ZNF207	HGLibA_62868	TCTTACCCAGGTGGCATGCC	22	ZNF207	1
CAGTATGTCTTATCCTACGT	ZNF732	HGLibA_63934	CAGTATGTCTTATCCTACGT	22	ZNF732	1
ACAGACTCCGATGGCAGCGG	ZNF792	HGLibA_64059	ACAGACTCCGATGGCAGCGG	22	ZNF792	1
GCCAGACCTGATCGCCCATC	ZNF93	HGLibA_64198	GCCAGACCTGATCGCCCATC	22	ZNF93	1
AGGTCAGCACGGATGCGACA	ATP13A5	HGLibA_03577	AGGTCAGCACGGATGCGACA	22
AATTATGAGCCGTCACAGCC	FAM122B	HGLibA_16068	AATTATGAGCCGTCACAGCC	22
TCTCCCTCCTGAGCAGCTGC	GAGE1	HGLibA_18432	TCTCCCTCCTGAGCAGCTGC	22
TGCAATGCCTGGCTCAGAGT	hsa-mir-3139	HGLibA_23670	TGCAATGCCTGGCTCAGAGT	22
TCCTCCTCAGGATCGGAATG	ROMO1	HGLibA_49045	TCCTCCTCAGGATCGGAATG	22
GCAGGTACTTGATGCACCGC	TSPAN2	HGLibA_59210	GCAGGTACTTGATGCACCGC	22
TGTCTTCACGTCCCCGTTGA	CLIC5	HGLibA_10033	TGTCTTCACGTCCCCGTTGA	21	CLIC5	2
AGCACAGTGCTTATACAAGA	hsa-mir-1248	HGLibA_22444	AGCACAGTGCTTATACAAGA	21	hsa-mir-1248	2
GACTTACTTAGTGTCTCCCA	LOC100144595	HGLibA_34102	GACTTACTTAGTGTCTCCCA	21	LOC100144595	2
TTTCCGAGATGTAGAGTGTA	ADAM18	HGLibA_00743	TTTCCGAGATGTAGAGTGTA	21	ADAM18	1
CTGGATTTATGGATGCTTCG	ARHGAP27	HGLibA_02743	CTGGATTTATGGATGCTTCG	21	ARHGAP27	1
TGGATTGGTCGTGTTCATCG	B3GNT5	HGLibA_03994	TGGATTGGTCGTGTTCATCG	21	B3GNT5	1
AGGCCGTATCGCCTCCGCTG	C19orf24	HGLibA_05640	AGGCCGTATCGCCTCCGCTG	21	C19orf24	1
ACCTCCTGGGCGTAGCGATG	CAPN10	HGLibA_07144	ACCTCCTGGGCGTAGCGATG	21	CAPN10	1
TTGGCATGGGGCAATGCTTG	CIB4	HGLibA_09691	TTGGCATGGGGCAATGCTTG	21	CIB4	1
TCTCCGCCTTGCCCGCCGAG	DNAJC25	HGLibA_13606	TCTCCGCCTTGCCCGCCGAG	21	DNAJC25	1
AAGGGATGTTGCTGAACAGT	DPM1	HGLibA_13857	AAGGGATGTTGCTGAACAGT	21	DPM1	1
TCTTACCTCGATGACACCAT	EIF4A2	HGLibA_14808	TCTTACCTCGATGACACCAT	21	EIF4A2	1
CGTACACGTCCACCTTGAGA	FUT6	HGLibA_18201	CGTACACGTCCACCTTGAGA	21	FUT6	1
CGTTCTCGCAGCAAAACGCC	GADD45A	HGLibA_18416	CGTTCTCGCAGCAAAACGCC	21	GADD45A	1
TATCCGCTGTGCCCTCGACA	GCM2	HGLibA_18803	TATCCGCTGTGCCCTCGACA	21	GCM2	1
GTCGTGCCAGCAGCAGACCT	GJA1	HGLibA_19137	GTCGTGCCAGCAGCAGACCT	21	GJA1	1
CTTGGCATGTGCTTCACAGT	GNG2	HGLibA_19521	CTTGGCATGTGCTTCACAGT	21	GNG2	1
TACCTGTACCTCGAAGTCTA	GPBAR1	HGLibA_19752	TACCTGTACCTCGAAGTCTA	21	GPBAR1	1
TGCCCAATGCTACTGAAAAA	GPR132	HGLibA_19889	TGCCCAATGCTACTGAAAAA	21	GPR132	1
CGAGCGGTGCCAATCCATCC	GPR37L1	HGLibA_20036	CGAGCGGTGCCAATCCATCC	21	GPR37L1	1
CTGAACCATCACGCCCTCTT	HEG1	HGLibA_21107	CTGAACCATCACGCCCTCTT	21	HEG1	1
GCTGGCGCGAAGAGCGTCCG	HMX3	HGLibA_21764	GCTGGCGCGAAGAGCGTCCG	21	HMX3	1
CTTTCTAAAATGCAGATTCC	hsa-mir-1289-1	HGLibA_22673	CTTTCTAAAATGCAGATTCC	21	hsa-mir-1289-1	1
GAGCTGAGACTAGAAAGCCC	hsa-mir-3160-1	HGLibA_23770	GAGCTGAGACTAGAAAGCCC	21	hsa-mir-3160-1	1
ACCCTGCCTCTCCTCCCTCG	hsa-mir-3183	HGLibA_23882	ACCCTGCCTCTCCTCCCTCG	21	hsa-mir-3183	1
CTTGTAGATAATCTAGTGAT	hsa-mir-3938	HGLibA_24666	CTTGTAGATAATCTAGTGAT	21	hsa-mir-3938	1
CGGGAGTTCGCGCGCGGAGC	hsa-mir-4785	HGLibA_26300	CGGGAGTTCGCGCGCGGAGC	21	hsa-mir-4785	1
AAGTGCTTCTTACCTCCAGA	hsa-mir-516b-1	HGLibA_26672	AAGTGCTTCTTACCTCCAGA	21	hsa-mir-516b-1	1
CAATCCTGGGATGGGTGTTT	hsa-mir-5705	HGLibA_27415	CAATCCTGGGATGGGTGTTT	21	hsa-mir-5705	1
CCTCTGCTGAAACACGAGTA	IFT140	HGLibA_30035	CCTCTGCTGAAACACGAGTA	21	IFT140	1
TAATGATATTCCTCACGCCC	IMPG2	HGLibA_30552	TAATGATATTCCTCACGCCC	21	IMPG2	1
GTTATATCGGAGATTCCATC	LAMA4	HGLibA_33237	GTTATATCGGAGATTCCATC	21	LAMA4	1
TATTTGACCGTCTCAGATCC	LAMP3	HGLibA_33270	TATTTGACCGTCTCAGATCC	21	LAMP3	1
AACTACTGATCAGGCATTTC	LETMD1	HGLibA_33628	AACTACTGATCAGGCATTTC	21	LETMD1	1
TGAATCATCTTCACATATGA	LGALS16	HGLibA_33646	TGAATCATCTTCACATATGA	21	LGALS16	1
GCGTGAGGTCGACCGCAACC	MAD1L1	HGLibA_35129	GCGTGAGGTCGACCGCAACC	21	MAD1L1	1
TGCAAACAGATATATAGTAC	MAPK1	HGLibA_35536	TGCAAACAGATATATAGTAC	21	MAPK1	1
GGCCAGTAGATTGCCCAGTA	METTL20	HGLibA_36261	GGCCAGTAGATTGCCCAGTA	21	METTL20	1
TGCACAGGCGGGTGATATTG	MFAP3L	HGLibA_36335	TGCACAGGCGGGTGATATTG	21	MFAP3L	1
CATGGTACTCATTTCGCCTC	MGLL	HGLibA_36446	CATGGTACTCATTTCGCCTC	21	MGLL	1
ATCCACAATCGATATATAGT	NAALAD2	HGLibA_38297	ATCCACAATCGATATATAGT	21	NAALAD2	1
ATTGCGGGCTATGGCGCCGA	NDUFA11	HGLibA_38730	ATTGCGGGCTATGGCGCCGA	21	NDUFA11	1
TTTCTTCACACCTGTCGTGA	NF1	HGLibA_39047	TTTCTTCACACCTGTCGTGA	21	NF1	1
TGTTTTGCATGTTGCATAGG	NonTargetingControlGuideForHuman_0898	HGLibA_65281	TGTTTTGCATGTTGCATAGG	21	NonTargetingControlGuideForHuman_0898	1
CTCCAAGATGTCAGCCAATC	OCM	HGLibA_40544	CTCCAAGATGTCAGCCAATC	21	OCM	1
CACATACTCACGAATCTGCT	OR52K1	HGLibA_41469	CACATACTCACGAATCTGCT	21	OR52K1	1
ACAGCACGGATATTCGCCGC	PELI2	HGLibA_43324	ACAGCACGGATATTCGCCGC	21	PELI2	1
GTGGTCTCCACACGATCCAC	PFAS	HGLibA_43423	GTGGTCTCCACACGATCCAC	21	PFAS	1
TTACTGATGTTGCTGTAGAA	PGAM1	HGLibA_43484	TTACTGATGTTGCTGTAGAA	21	PGAM1	1
CCTGCACTAGACACTTATCT	PRR9	HGLibA_46142	CCTGCACTAGACACTTATCT	21	PRR9	1
TTCCGCACAATTTAAACGTC	RAB3IP	HGLibA_47215	TTCCGCACAATTTAAACGTC	21	RAB3IP	1
TTTGTTAGGTCATCGTATTG	RPL4	HGLibA_49269	TTTGTTAGGTCATCGTATTG	21	RPL4	1
GCTTAGTTATATCCAGCGAT	SAMHD1	HGLibA_49991	GCTTAGTTATATCCAGCGAT	21	SAMHD1	1
TGTACTCACGTAGTGCTTGG	SH3PXD2A	HGLibA_51251	TGTACTCACGTAGTGCTTGG	21	SH3PXD2A	1
GTTGTCATTGCGCTGATCAC	SLC26A7	HGLibA_52093	GTTGTCATTGCGCTGATCAC	21	SLC26A7	1
CTCCTGAACTCTTGAATCAA	SLX4IP	HGLibA_52855	CTCCTGAACTCTTGAATCAA	21	SLX4IP	1
CTATTCCTCAGCGCAGACGA	SORCS2	HGLibA_53475	CTATTCCTCAGCGCAGACGA	21	SORCS2	1
GGTGTACCTCTTGCACTTGC	SOSTDC1	HGLibA_53497	GGTGTACCTCTTGCACTTGC	21	SOSTDC1	1
ATATACCATCGCTGTAAAGG	SUPT16H	HGLibA_55091	ATATACCATCGCTGTAAAGG	21	SUPT16H	1
CTCCCATTTCAGCGTCCTTC	TBCK	HGLibA_55887	CTCCCATTTCAGCGTCCTTC	21	TBCK	1
CGCCTTGAGCGTGCTCTCGT	THOP1	HGLibA_56669	CGCCTTGAGCGTGCTCTCGT	21	THOP1	1
CTCCGTTAACCATTGCAACT	TJP1	HGLibA_56858	CTCCGTTAACCATTGCAACT	21	TJP1	1
CGATCACTAAACATGTATGC	TRPC6	HGLibA_59034	CGATCACTAAACATGTATGC	21	TRPC6	1
CTAAGCGAATATGCCGTAAT	YTHDF3	HGLibA_62023	CTAAGCGAATATGCCGTAAT	21	YTHDF3	1
CTGACCAAAGCTATTACTAC	ZNF284	HGLibA_63032	CTGACCAAAGCTATTACTAC	21	ZNF284	1
GGCCTGACCAGCATAGTCTC	ZNF414	HGLibA_63227	GGCCTGACCAGCATAGTCTC	21	ZNF414	1
GTCCTCGATACGGAAGGGTC	C14orf178	HGLibA_05345	GTCCTCGATACGGAAGGGTC	21
GCTTCTCGTTCTCTACGATT	C2orf80	HGLibA_06189	GCTTCTCGTTCTCTACGATT	21
GCTAGCATCAATCGCATTTA	PPP1CB	HGLibA_45297	GCTAGCATCAATCGCATTTA	21
TATGTCCGAAATGTACTATA	TBX3	HGLibA_55956	TATGTCCGAAATGTACTATA	21
GACTCTGCTTCCGATGCCTC	hsa-mir-4294	HGLibA_24943	GACTCTGCTTCCGATGCCTC	20	hsa-mir-4294	3
ATTATACCTCAATATCCCTC	FBXL20	HGLibA_16999	ATTATACCTCAATATCCCTC	20	FBXL20	2
CATCCACTGCGGGGCAGATG	hsa-mir-1909	HGLibA_23083	CATCCACTGCGGGGCAGATG	20	hsa-mir-1909	2
CTGCGACATTTGAGCGTCAC	hsa-mir-372	HGLibA_24435	CTGCGACATTTGAGCGTCAC	20	hsa-mir-372	2
AAACTACATGCCGCCCATCT	KIAA1586	HGLibA_32074	AAACTACATGCCGCCCATCT	20	KIAA1586	2
TGTAGTACTCGTGCTTGTCC	POFUT2	HGLibA_44760	TGTAGTACTCGTGCTTGTCC	20	POFUT2	2
CAAACTCCACGCCGATTGTG	RAB4B	HGLibA_47245	CAAACTCCACGCCGATTGTG	20	RAB4B	2
GTTACTACAACACTGATTCC	RAB5A	HGLibA_47248	GTTACTACAACACTGATTCC	20	RAB5A	2
AAAGATATACAATCCTGTCT	VAMP7_X	HGLibA_60790	AAAGATATACAATCCTGTCT	20	VAMP7_X	2
AGATCAGATTGCACACATGA	ABCF2	HGLibA_00210	AGATCAGATTGCACACATGA	20	ABCF2	1
CACTGGCGACGGCTGATCAG	ATP10D	HGLibA_03552	CACTGGCGACGGCTGATCAG	20	ATP10D	1
TGCCAGACTCCCCGAAAATC	BAHCC1	HGLibA_04108	TGCCAGACTCCCCGAAAATC	20	BAHCC1	1
TTCCCTGGCAAGACCACCGC	C10orf10	HGLibA_05020	TTCCCTGGCAAGACCACCGC	20	C10orf10	1
CAGACCGCGGGCGTCAGCGT	C11orf71	HGLibA_05177	CAGACCGCGGGCGTCAGCGT	20	C11orf71	1
CATAACCCGTGATACCAAAC	C1orf131	HGLibA_05767	CATAACCCGTGATACCAAAC	20	C1orf131	1
CGTCCCGGTTGAAGATCACC	C20orf196	HGLibA_06006	CGTCCCGGTTGAAGATCACC	20	C20orf196	1
ATTGACGTCGGTGACTACGA	CDH22	HGLibA_08666	ATTGACGTCGGTGACTACGA	20	CDH22	1
CGTCCGTTGCCTTCATGTGA	CFH	HGLibA_09259	CGTCCGTTGCCTTCATGTGA	20	CFH	1
TGACCATAGAATCAAGCCTG	CLC	HGLibA_09803	TGACCATAGAATCAAGCCTG	20	CLC	1
TCCATCTTTCTAGCATTACC	CLOCK	HGLibA_10092	TCCATCTTTCTAGCATTACC	20	CLOCK	1
CAACGATGTCCTTCCGACCC	CMTR1	HGLibA_10232	CAACGATGTCCTTCCGACCC	20	CMTR1	1
AGATACATTATGGTGCCGAG	CNIH4	HGLibA_10292	AGATACATTATGGTGCCGAG	20	CNIH4	1
TGTGACTGCACTCCGAATAT	COPS2	HGLibA_10713	TGTGACTGCACTCCGAATAT	20	COPS2	1
CTTCTAGCACACGTGTGAGC	COQ9	HGLibA_10766	CTTCTAGCACACGTGTGAGC	20	COQ9	1
ATAGGAAGTATCCGACTCTT	CRP	HGLibA_11215	ATAGGAAGTATCCGACTCTT	20	CRP	1
CAGTAAGATACTGATCTCTA	CSPP1	HGLibA_11421	CAGTAAGATACTGATCTCTA	20	CSPP1	1
AACACTCACTTCAAAGGTCC	CXorf49	HGLibA_11931	AACACTCACTTCAAAGGTCC	20	CXorf49	1
TAGTTACGTTAGCAGGTTTC	CYTIP	HGLibA_12247	TAGTTACGTTAGCAGGTTTC	20	CYTIP	1
TCATGTACCTGGATCGTTTA	DDX23	HGLibA_12675	TCATGTACCTGGATCGTTTA	20	DDX23	1
CCTTCGCACAGTCGCAACGC	DKK2	HGLibA_13296	CCTTCGCACAGTCGCAACGC	20	DKK2	1
TGTACCCAACGATTTGCAGA	ELMOD1	HGLibA_14938	TGTACCCAACGATTTGCAGA	20	ELMOD1	1
AGCCATCTCCAATATGCCAT	ERAP1	HGLibA_15405	AGCCATCTCCAATATGCCAT	20	ERAP1	1
CCATGGATCCACTCCAGAAA	FAM156A	HGLibA_16185	CCATGGATCCACTCCAGAAA	20	FAM156A	1
TGGGACACCTTGACCCTTCG	FAM196B	HGLibA_16384	TGGGACACCTTGACCCTTCG	20	FAM196B	1
GCGGGAGGCCTACCACGCTG	FDXR	HGLibA_17266	GCGGGAGGCCTACCACGCTG	20	FDXR	1
TGACATACCGTGATCAGCCG	FHL3	HGLibA_17485	TGACATACCGTGATCAGCCG	20	FHL3	1
TGGACGCCGACAAAGGTGCG	FUT1	HGLibA_18180	TGGACGCCGACAAAGGTGCG	20	FUT1	1
GGAGGCGTGCGAGTCTTACC	HIST3H3	HGLibA_21560	GGAGGCGTGCGAGTCTTACC	20	HIST3H3	1
GGTCGCAGCCAATCATCCAC	HLA-G	HGLibA_21648	GGTCGCAGCCAATCATCCAC	20	HLA-G	1
CAATCCGCCGTAGCAGTACC	HOXC5	HGLibA_21970	CAATCCGCCGTAGCAGTACC	20	HOXC5	1
CAAAATTCCTTACACAAATT	hsa-mir-10a	HGLibA_22250	CAAAATTCCTTACACAAATT	20	hsa-mir-10a	1
AGGCTGATCTTCTTCTCTTT	hsa-mir-1253	HGLibA_22464	AGGCTGATCTTCTTCTCTTT	20	hsa-mir-1253	1
CGGCCTGAGCATGTTCTGTG	hsa-mir-4284	HGLibA_24896	CGGCCTGAGCATGTTCTGTG	20	hsa-mir-4284	1
CACTGAATCCTCTTTTCCTC	hsa-mir-5187	HGLibA_26694	CACTGAATCCTCTTTTCCTC	20	hsa-mir-5187	1
AATGTACAGTGGTTCTCTTG	hsa-mir-597	HGLibA_27534	AATGTACAGTGGTTCTCTTG	20	hsa-mir-597	1
TGATGTGGTGGTAAGGGTAG	hsa-mir-625	HGLibA_27792	TGATGTGGTGGTAAGGGTAG	20	hsa-mir-625	1
TGCCCGGCGCCGCGTACGCT	IER5L	HGLibA_29873	TGCCCGGCGCCGCGTACGCT	20	IER5L	1
CGAGTGCGAAGGTCTGCCCC	KLF15	HGLibA_32345	CGAGTGCGAAGGTCTGCCCC	20	KLF15	1
TGAGTGTTACAACCCCGAGC	KLHL42	HGLibA_32501	TGAGTGTTACAACCCCGAGC	20	KLHL42	1
TTCGGAGCAGACTCGTGCCG	KPNA7	HGLibA_32659	TTCGGAGCAGACTCGTGCCG	20	KPNA7	1
CTCGTCCGTGCACTCGTCCA	LAMC1	HGLibA_33255	CTCGTCCGTGCACTCGTCCA	20	LAMC1	1
CGCTGTTCCTCGCCACGCTC	LTC4S	HGLibA_34894	CGCTGTTCCTCGCCACGCTC	20	LTC4S	1
TTAGCTGACTGCAGATGATG	LZIC	HGLibA_35086	TTAGCTGACTGCAGATGATG	20	LZIC	1
CAGTTCCAGCAGTAAGCCGA	NUP160	HGLibA_40317	CAGTTCCAGCAGTAAGCCGA	20	NUP160	1
CATGCTGTCTGCGTACGCCA	NXPH2	HGLibA_40453	CATGCTGTCTGCGTACGCCA	20	NXPH2	1
CATTCCCCACCGCAGCGAGC	OR1L6	HGLibA_40983	CATTCCCCACCGCAGCGAGC	20	OR1L6	1
TATTCCCCACAATGGCAATC	OR52E4	HGLibA_41447	TATTCCCCACAATGGCAATC	20	OR52E4	1
CCACAACCTTCCTTATCATC	OSMR	HGLibA_41984	CCACAACCTTCCTTATCATC	20	OSMR	1
CTGTCACGACCACCACCCAG	PILRA	HGLibA_43958	CTGTCACGACCACCACCCAG	20	PILRA	1
CACTCGGAATCGATCCTCCC	PKDCC	HGLibA_44095	CACTCGGAATCGATCCTCCC	20	PKDCC	1
CATGCTGCGTTCATTCCTTT	PPIE	HGLibA_45216	CATGCTGCGTTCATTCCTTT	20	PPIE	1
AATACATACAGCAGGAGGAC	PSPH	HGLibA_46515	AATACATACAGCAGGAGGAC	20	PSPH	1
CGTTCGAGTCCATCCCTCAC	RAB19	HGLibA_47114	CGTTCGAGTCCATCCCTCAC	20	RAB19	1
ATCGGCCCCTTCCTTGAACC	SIGLEC12	HGLibA_51421	ATCGGCCCCTTCCTTGAACC	20	SIGLEC12	1
CCACGAGCAATGACCCCAAC	SLC2A7	HGLibA_52176	CCACGAGCAATGACCCCAAC	20	SLC2A7	1
TGAGCACCATGCCACTTAGA	SMPD2	HGLibA_53095	TGAGCACCATGCCACTTAGA	20	SMPD2	1
CACCTCCTCTATGTCGCGGA	SPC24	HGLibA_53839	CACCTCCTCTATGTCGCGGA	20	SPC24	1
CTTCTACGACGTGGTCCGCG	STK40	HGLibA_54800	CTTCTACGACGTGGTCCGCG	20	STK40	1
GCTATAGTGTAGACATCCTG	TARP	HGLibA_55629	GCTATAGTGTAGACATCCTG	20	TARP	1
CTACGTACCTTTAAAGTCCA	TEX11	HGLibA_56340	CTACGTACCTTTAAAGTCCA	20	TEX11	1
CCACATCAATGTCGTCACCA	TFAP4	HGLibA_56425	CCACATCAATGTCGTCACCA	20	TFAP4	1
ACAACCCCATCTACGTCACC	TGM6	HGLibA_56555	ACAACCCCATCTACGTCACC	20	TGM6	1
CGCTTTAATTCTCCGTCTGT	TLX1NB	HGLibA_56961	CGCTTTAATTCTCCGTCTGT	20	TLX1NB	1
AGGATCCGCGAAGGCGTACC	TOPORS	HGLibA_58300	AGGATCCGCGAAGGCGTACC	20	TOPORS	1
GTGCGCACGTTGTAGACCTG	TRMT61A	HGLibA_58987	GTGCGCACGTTGTAGACCTG	20	TRMT61A	1
GACGGCTGTCTTGACATTGT	TUBB	HGLibA_59558	GACGGCTGTCTTGACATTGT	20	TUBB	1
CTGCACGCAAGAGTGCGTCT	WFDC2	HGLibA_61551	CTGCACGCAAGAGTGCGTCT	20	WFDC2	1
ATAGTAGTTTGCTACAATGC	YEATS2	HGLibA_61942	ATAGTAGTTTGCTACAATGC	20	YEATS2	1
CCATCACGCCCATCTTTGCC	MBL2	HGLibA_35788	CCATCACGCCCATCTTTGCC	20
CAGGGTGAGGCTAGCTGGTG	hsa-mir-4316	HGLibA_25039	CAGGGTGAGGCTAGCTGGTG	19	hsa-mir-4316	2
CGTGTCGTACGTACGCCCTG	MTMR12	HGLibA_37706	CGTGTCGTACGTACGCCCTG	19	MTMR12	2
TTCAGGTGGGCATCCAAGAC	PAN2	HGLibA_42380	TTCAGGTGGGCATCCAAGAC	19	PAN2	2
GCCCCGCCAAGACTATCAGC	AIMP2	HGLibA_01357	GCCCCGCCAAGACTATCAGC	19	AIMP2	1
CCGCCACCCCGCTATTGCAG	ALS2CR11	HGLibA_01724	CCGCCACCCCGCTATTGCAG	19	ALS2CR11	1
TGACCTACCTGCCCACCGTC	ARHGAP44	HGLibA_02780	TGACCTACCTGCCCACCGTC	19	ARHGAP44	1
CAATAGTACCTGTGAAAATC	BPY2	HGLibA_04742	CAATAGTACCTGTGAAAATC	19	BPY2	1
TTCACTACCGTAGAAGACCT	BSG	HGLibA_04867	TTCACTACCGTAGAAGACCT	19	BSG	1
CGAGGCCACCGAGTCCTCGA	C19orf35	HGLibA_05652	CGAGGCCACCGAGTCCTCGA	19	C19orf35	1
GTCGTGGTACTCTAGGTCAA	CDCP2	HGLibA_08627	GTCGTGGTACTCTAGGTCAA	19	CDCP2	1
CCAGTCAATGACGTAGATGT	CHMP7	HGLibA_09501	CCAGTCAATGACGTAGATGT	19	CHMP7	1
TTGTAGGTATCGTCAGATCC	COPS4	HGLibA_10718	TTGTAGGTATCGTCAGATCC	19	COPS4	1
AGCTTCCGCATGCGCCAGTG	DENND6B	HGLibA_12967	AGCTTCCGCATGCGCCAGTG	19	DENND6B	1
AGCCATACTGCCCATTAGCG	DNAJC22	HGLibA_13600	AGCCATACTGCCCATTAGCG	19	DNAJC22	1
GATGATGACATCACCCTTAC	ELF1	HGLibA_14891	GATGATGACATCACCCTTAC	19	ELF1	1
TGCTCCGTCGCTACCGCCTC	FAM229A	HGLibA_16541	TGCTCCGTCGCTACCGCCTC	19	FAM229A	1
ATATTATGGTGAAAGGCTTG	FAM91A1	HGLibA_16795	ATATTATGGTGAAAGGCTTG	19	FAM91A1	1
GCGTCGCTTCGATGCCGCGC	FBXL15	HGLibA_16981	GCGTCGCTTCGATGCCGCGC	19	FBXL15	1
GGTGTATGTGCCGCGGTCCG	FGFR4	HGLibA_17451	GGTGTATGTGCCGCGGTCCG	19	FGFR4	1
CTCGCGCCCGGAGACCTACG	FKRP	HGLibA_17596	CTCGCGCCCGGAGACCTACG	19	FKRP	1
GTGGGTCCCACGTGACTTTC	FNDC1	HGLibA_17745	GTGGGTCCCACGTGACTTTC	19	FNDC1	1
TCCCGGCTTATGCAACTACA	GDAP1	HGLibA_18838	TCCCGGCTTATGCAACTACA	19	GDAP1	1
GCGGCCACACACCGGCAACG	GLT1D1	HGLibA_19330	GCGGCCACACACCGGCAACG	19	GLT1D1	1
TTGTCACTGAGCTTGACTCC	GOLGA6C	HGLibA_19614	TTGTCACTGAGCTTGACTCC	19	GOLGA6C	1
TGCAGTGCCGCCCTACACCG	GSTP1	HGLibA_20492	TGCAGTGCCGCCCTACACCG	19	GSTP1	1
TGGGGATGTTGCAGCTGCCT	hsa-mir-1301	HGLibA_22734	TGGGGATGTTGCAGCTGCCT	19	hsa-mir-1301	1
AGTTACTTTATAGCCATACC	hsa-mir-340	HGLibA_24075	AGTTACTTTATAGCCATACC	19	hsa-mir-340	1
CTTCTCGTGGGCTCTGGCCA	hsa-mir-3677	HGLibA_24312	CTTCTCGTGGGCTCTGGCCA	19	hsa-mir-3677	1
CCTCTGACTCCCTGCCCGAG	hsa-mir-4740	HGLibA_26113	CCTCTGACTCCCTGCCCGAG	19	hsa-mir-4740	1
CAAGACCAGTCGTCCATCTC	ITIH6	HGLibA_31106	CAAGACCAGTCGTCCATCTC	19	ITIH6	1
GGGCCAACATGCCTGTGCGC	KCNH7	HGLibA_31516	GGGCCAACATGCCTGTGCGC	19	KCNH7	1
AACGTGCTGTTGCCGAGCTG	KIAA0226	HGLibA_31894	AACGTGCTGTTGCCGAGCTG	19	KIAA0226	1
CAGCTCCATGATGCGTTATC	LGALS3	HGLibA_33650	CAGCTCCATGATGCGTTATC	19	LGALS3	1
TATGGCTTCAGAACTTCGTA	LIPI	HGLibA_33907	TATGGCTTCAGAACTTCGTA	19	LIPI	1
CTATGCGTAGAAGAACTACT	LUZP6	HGLibA_34934	CTATGCGTAGAAGAACTACT	19	LUZP6	1
AGTCTTGAAAGCGCATGCCA	MBD2	HGLibA_35755	AGTCTTGAAAGCGCATGCCA	19	MBD2	1
TGACGCCCGCTGAGATCTGC	MORN1	HGLibA_36955	TGACGCCCGCTGAGATCTGC	19	MORN1	1
ATTAAAGCCAGCTCGTAGCG	MRPS6	HGLibA_37394	ATTAAAGCCAGCTCGTAGCG	19	MRPS6	1
AGGGTAGATGATATGCCTCC	NBEAL1	HGLibA_38498	AGGGTAGATGATATGCCTCC	19	NBEAL1	1
CGCGGCCCTTCACGTAGATG	NDN	HGLibA_38686	CGCGGCCCTTCACGTAGATG	19	NDN	1
TCTCATATTCGCTTAGCCCT	NIF3L1	HGLibA_39218	TCTCATATTCGCTTAGCCCT	19	NIF3L1	1
CATCATCTGGTCCTATAGTC	NLRP14	HGLibA_39400	CATCATCTGGTCCTATAGTC	19	NLRP14	1
TTCGCACGATTGCACCTTGG	NonTargetingControlGuideForHuman_0060	HGLibA_64443	TTCGCACGATTGCACCTTGG	19	NonTargetingControlGuideForHuman_0060	1
GCCGTGCACTTACTCTTCTG	OR4F5	HGLibA_41297	GCCGTGCACTTACTCTTCTG	19	OR4F5	1
ACCGAAACGTAACTCGACAG	PCDHA5	HGLibA_42735	ACCGAAACGTAACTCGACAG	19	PCDHA5	1
AGAAAGCCCGCCGCCGTCTT	PCDHB7	HGLibA_42797	AGAAAGCCCGCCGCCGTCTT	19	PCDHB7	1
CGATCATACTGAGAACAATC	PCMTD2	HGLibA_42920	CGATCATACTGAGAACAATC	19	PCMTD2	1
CCTAGAATGTATCGTGTGAC	PIGV	HGLibA_43883	CCTAGAATGTATCGTGTGAC	19	PIGV	1
ACGCTTCGGCATGACGCAGA	PSMD3	HGLibA_46456	ACGCTTCGGCATGACGCAGA	19	PSMD3	1
CCAGCAAGTCGGTGACCGTC	PTGDR	HGLibA_46592	CCAGCAAGTCGGTGACCGTC	19	PTGDR	1
CTCTCCGCTACTTCCCGCAC	RFC4	HGLibA_48199	CTCTCCGCTACTTCCCGCAC	19	RFC4	1
CCGAAACAGACCGCGCTCCC	RINL	HGLibA_48588	CCGAAACAGACCGCGCTCCC	19	RINL	1
TCTGGCTGTGCGAATTCAGC	ROBO4	HGLibA_49030	TCTGGCTGTGCGAATTCAGC	19	ROBO4	1
TCCAGACTTACTTGATCAAC	SERHL2	HGLibA_50770	TCCAGACTTACTTGATCAAC	19	SERHL2	1
TAAGTGTTAGCATGACCGTG	SGMS1	HGLibA_51124	TAAGTGTTAGCATGACCGTG	19	SGMS1	1
TGCTCTCAGTATAGATTACC	SPINK2	HGLibA_53978	TGCTCTCAGTATAGATTACC	19	SPINK2	1
CTGAGTCTGGCTTTCGTCTA	TAMM41	HGLibA_55577	CTGAGTCTGGCTTTCGTCTA	19	TAMM41	1
GTCCTAACCTTTGCGGCAGT	TEPP	HGLibA_56299	GTCCTAACCTTTGCGGCAGT	19	TEPP	1
CATTCGCCTCTGTTCCAGTT	TMEM139	HGLibA_57246	CATTCGCCTCTGTTCCAGTT	19	TMEM139	1
GGCCTGATGACATTAACCCG	TMEM215	HGLibA_57508	GGCCTGATGACATTAACCCG	19	TMEM215	1
CCGGGACGCTCTGCTTCGCT	TMEM61	HGLibA_57755	CCGGGACGCTCTGCTTCGCT	19	TMEM61	1
TGGAGACCGGTGGCCTGTTT	TRPC5OS	HGLibA_59032	TGGAGACCGGTGGCCTGTTT	19	TRPC5OS	1
GTCTCCGAGAATCCGACGCA	TULP2	HGLibA_59621	GTCTCCGAGAATCCGACGCA	19	TULP2	1
ACCGCTTGCCGCGCCTCTTG	UCMA	HGLibA_60106	ACCGCTTGCCGCGCCTCTTG	19	UCMA	1
TGAAGACGCGCGCTTAACTC	UTS2	HGLibA_60748	TGAAGACGCGCGCTTAACTC	19	UTS2	1
CTTTATTTAGTGGACATATC	VPS45	HGLibA_61083	CTTTATTTAGTGGACATATC	19	VPS45	1
CTTCAACCTCAAGTGATTCG	ZNF550	HGLibA_63500	CTTCAACCTCAAGTGATTCG	19	ZNF550	1
CATCATCACATGTGCGCGAA	ZNF556	HGLibA_63515	CATCATCACATGTGCGCGAA	19	ZNF556	1
GTGTCCGTTGCTGAGATGCG	ZNF804A	HGLibA_64077	GTGTCCGTTGCTGAGATGCG	19	ZNF804A	1
TTTAGGGACACTTGGCATTC	ZNF880	HGLibA_64182	TTTAGGGACACTTGGCATTC	19	ZNF880	1
CGACCTCACCTGGTACGCCA	C1orf35	HGLibA_05854	CGACCTCACCTGGTACGCCA	19
CGTGTTGCATGCGTTCGCTG	SATB2	HGLibA_50068	CGTGTTGCATGCGTTCGCTG	19
GCCGCTCAGTACACCACCGT	SGSH	HGLibA_51143	GCCGCTCAGTACACCACCGT	19
GTTGTAACTAGATTCATTCA	THEM4	HGLibA_56627	GTTGTAACTAGATTCATTCA	18	THEM4	2
TCACCACTTATATCGTCCAA	ACBD4	HGLibA_00400	TCACCACTTATATCGTCCAA	18	ACBD4	1
CAGCAAGAGGATCGTCCTGC	ADRBK2	HGLibA_01066	CAGCAAGAGGATCGTCCTGC	18	ADRBK2	1
CTAATTACTTGTACCTATCG	ASF1A	HGLibA_03281	CTAATTACTTGTACCTATCG	18	ASF1A	1
CATTCACTCCATCAGAATTA	BBS2	HGLibA_04216	CATTCACTCCATCAGAATTA	18	BBS2	1
TTCCCCGCTTCAGGCTTCGA	C10orf91	HGLibA_05106	TTCCCCGCTTCAGGCTTCGA	18	C10orf91	1
AACAACCGATGCGTGAACAC	CDH5	HGLibA_08683	AACAACCGATGCGTGAACAC	18	CDH5	1
ACTCCATACGGTACAAAGCG	CEACAM20	HGLibA_08931	ACTCCATACGGTACAAAGCG	18	CEACAM20	1
CAGCGGGAAGTCTATGTAAA	CEP55	HGLibA_09144	CAGCGGGAAGTCTATGTAAA	18	CEP55	1
GTCAGCTTGTCTCACATAAC	CEP95	HGLibA_09179	GTCAGCTTGTCTCACATAAC	18	CEP95	1
GATACTCCCCCGGCGAGAGC	CHRDL2	HGLibA_09540	GATACTCCCCCGGCGAGAGC	18	CHRDL2	1
GGACCGGGATGTGGGTATCC	COL16A1	HGLibA_10519	GGACCGGGATGTGGGTATCC	18	COL16A1	1
ATAGGGGCACAAAACGTCCC	CTNNBL1	HGLibA_11656	ATAGGGGCACAAAACGTCCC	18	CTNNBL1	1
CTACTCTATCAAGATCTTCC	DEFB104A	HGLibA_12819	CTACTCTATCAAGATCTTCC	18	DEFB104A	1
CGACTGCTCGTATTCGCGCA	DNAJC30	HGLibA_13618	CGACTGCTCGTATTCGCGCA	18	DNAJC30	1
ACCTAAAAGTCAGCGCGACT	EN1	HGLibA_15098	ACCTAAAAGTCAGCGCGACT	18	EN1	1
TGCTGCCTTGGACGACCCCC	EXD3	HGLibA_15723	TGCTGCCTTGGACGACCCCC	18	EXD3	1
GTGCTCCAGCACAGCGTTCT	FMNL1	HGLibA_17693	GTGCTCCAGCACAGCGTTCT	18	FMNL1	1
CGTGACTTGAAATACTCAGA	GATAD1	HGLibA_18684	CGTGACTTGAAATACTCAGA	18	GATAD1	1
GGCTGTGATGTGGGTTACCG	GBA2	HGLibA_18712	GGCTGTGATGTGGGTTACCG	18	GBA2	1
ATACTCCTCGATGGATACTC	GCA	HGLibA_18759	ATACTCCTCGATGGATACTC	18	GCA	1
CAGGAATGCTACGCGTTTAA	HLA-DPB1	HGLibA_21619	CAGGAATGCTACGCGTTTAA	18	HLA-DPB1	1
ACCCCTCACATTATCTACAA	hsa-mir-1262	HGLibA_22525	ACCCCTCACATTATCTACAA	18	hsa-mir-1262	1
AAGAGAGACTGACACATCAG	hsa-mir-151b	HGLibA_22953	AAGAGAGACTGACACATCAG	18	hsa-mir-151b	1
CCTGCCCTGCTCAGAGCCCT	hsa-mir-211	HGLibA_23270	CCTGCCCTGCTCAGAGCCCT	18	hsa-mir-211	1
CTCAAAATAAAGGATACAGA	hsa-mir-4509-2	HGLibA_25521	CTCAAAATAAAGGATACAGA	18	hsa-mir-4509-2	1
TCAAAGAGTAATCCTCTAAA	hsa-mir-526a-1	HGLibA_26846	TCAAAGAGTAATCCTCTAAA	18	hsa-mir-526a-1	1
GAAAGGCATCTTCAACCAAC	hsa-mir-552	HGLibA_27180	GAAAGGCATCTTCAACCAAC	18	hsa-mir-552	1
CACCAATGCCGCCTGGGCCG	hsa-mir-6075	HGLibA_27606	CACCAATGCCGCCTGGGCCG	18	hsa-mir-6075	1
GCCTCACCGCATCCCAGAAG	hsa-mir-6132	HGLibA_27734	GCCTCACCGCATCCCAGAAG	18	hsa-mir-6132	1
TGATGGAGCTGGGAATACTC	hsa-mir-8082	HGLibA_29224	TGATGGAGCTGGGAATACTC	18	hsa-mir-8082	1
GCCGGTACAGCCAATGGTGG	IFNL2	HGLibA_30011	GCCGGTACAGCCAATGGTGG	18	IFNL2	1
ACTTACAAATGACCGAAGCT	IFT57	HGLibA_30056	ACTTACAAATGACCGAAGCT	18	IFT57	1
GCTGTCTCCTGGCGTCAATC	KIAA1755	HGLibA_32106	GCTGTCTCCTGGCGTCAATC	18	KIAA1755	1
TCATTGTGACTGTTGTCCGA	LAIR1	HGLibA_33220	TCATTGTGACTGTTGTCCGA	18	LAIR1	1
TGCGCGCCGCCCCCTATGAC	LCAT	HGLibA_33384	TGCGCGCCGCCCCCTATGAC	18	LCAT	1
AGGCTGAGTTCATAGCGTAG	LNPEP	HGLibA_34028	AGGCTGAGTTCATAGCGTAG	18	LNPEP	1
GGTCAAAATGATCAACGTTC	LOC100130370	HGLibA_34072	GGTCAAAATGATCAACGTTC	18	LOC100130370	1
GGACATCGTGTACCGCACCA	MED30	HGLibA_36090	GGACATCGTGTACCGCACCA	18	MED30	1
TCTAAGATCCCTTCATTAAC	MGP	HGLibA_36457	TCTAAGATCCCTTCATTAAC	18	MGP	1
TGCCGACCGACTCATCTGCT	NLRC3	HGLibA_39375	TGCCGACCGACTCATCTGCT	18	NLRC3	1
CCTGTCGCTATCGTTAGAGA	NonTargetingControlGuideForHuman_0408	HGLibA_64791	CCTGTCGCTATCGTTAGAGA	18	NonTargetingControlGuideForHuman_0408	1
CCACCCTGTTGTACATCCAC	NSL1	HGLibA_40047	CCACCCTGTTGTACATCCAC	18	NSL1	1
TTACAAATTCGGTCAGCATC	OR2W3	HGLibA_41194	TTACAAATTCGGTCAGCATC	18	OR2W3	1
GCTGACATATGGACCTGCCC	PCED1A	HGLibA_42872	GCTGACATATGGACCTGCCC	18	PCED1A	1
AGGTTTGGGGACGACATCCC	PDE6G	HGLibA_43106	AGGTTTGGGGACGACATCCC	18	PDE6G	1
GATGGCCATGCCCCCCACAG	PHGR1	HGLibA_43684	GATGGCCATGCCCCCCACAG	18	PHGR1	1
ACAGCATCGACTGCACGTTG	PKN3	HGLibA_44132	ACAGCATCGACTGCACGTTG	18	PKN3	1
CTGCTCACCTCCGAGAAGGT	PLAC9	HGLibA_44237	CTGCTCACCTCCGAGAAGGT	18	PLAC9	1
CCAGTGTGTATGTCGATACA	POC1B	HGLibA_44733	CCAGTGTGTATGTCGATACA	18	POC1B	1
CTGCCTGCATTCCCCTAGAC	PRAMEF12	HGLibA_45576	CTGCCTGCATTCCCCTAGAC	18	PRAMEF12	1
GAACCGTTTGTGATGACCAA	PRSS12	HGLibA_46189	GAACCGTTTGTGATGACCAA	18	PRSS12	1
GTGTAGATCTTCTGGTGCAC	QRFPR	HGLibA_47028	GTGTAGATCTTCTGGTGCAC	18	QRFPR	1
ACACCATGCGCCGCGTCCTT	SHISA9	HGLibA_51342	ACACCATGCGCCGCGTCCTT	18	SHISA9	1
CTTTCGACCAGTTTGTTACG	SMAD9	HGLibA_52879	CTTTCGACCAGTTTGTTACG	18	SMAD9	1
AAAACATAACACGCATTCAT	SPINK1	HGLibA_53970	AAAACATAACACGCATTCAT	18	SPINK1	1
GGCTGCAACCATGAGGGTCT	SSC5D	HGLibA_54415	GGCTGCAACCATGAGGGTCT	18	SSC5D	1
CTATATGTTACCCTTGTCTC	SVOPL	HGLibA_55184	CTATATGTTACCCTTGTCTC	18	SVOPL	1
AAGGAGCGCTTCGACCCCTC	TPPP	HGLibA_58453	AAGGAGCGCTTCGACCCCTC	18	TPPP	1
CTCACCTGGATTCGGCACTG	TRAIP	HGLibA_58561	CTCACCTGGATTCGGCACTG	18	TRAIP	1
CGCACTCTACCTCGTTGTCG	TRMT2A	HGLibA_58972	CGCACTCTACCTCGTTGTCG	18	TRMT2A	1
AATCTCAACCGACACATCCG	ZBTB6	HGLibA_62201	AATCTCAACCGACACATCCG	18	ZBTB6	1
CATGAGTTCGATAGATGACG	ZFYVE1	HGLibA_62557	CATGAGTTCGATAGATGACG	18	ZFYVE1	1
TCATGTCTTTCCATAGTTAA	ZNF253	HGLibA_62960	TCATGTCTTTCCATAGTTAA	18	ZNF253	1
CGACAAGCGCTATCGCGTGA	ZNF786	HGLibA_64040	CGACAAGCGCTATCGCGTGA	18	ZNF786	1
TCCCATTGCTGTAGCTTTCC	PSMA2	HGLibA_46362	TCCCATTGCTGTAGCTTTCC	18
TAAAGGGTATGAAGCTCCAT	TAS2R50	HGLibA_55708	TAAAGGGTATGAAGCTCCAT	18
TGTGCCCATACGTGCCATGC	ATP13A4	HGLibA_03574	TGTGCCCATACGTGCCATGC	17	ATP13A4	2
TGACGACGATGCGCCCGACT	CCDC177	HGLibA_07711	TGACGACGATGCGCCCGACT	17	CCDC177	2
GAGCCTTATGTACGTCTATG	HOXC13	HGLibA_21964	GAGCCTTATGTACGTCTATG	17	HOXC13	2
CCCTCACTTACGTCTCTCCC	hsa-mir-711	HGLibA_28853	CCCTCACTTACGTCTCTCCC	17	hsa-mir-711	2
CCGCGTATCAGAACGTTACC	PTCHD1	HGLibA_46562	CCGCGTATCAGAACGTTACC	17	PTCHD1	2
CCCAGCGCCGACGGCGACGT	SUPV3L1	HGLibA_55117	CCCAGCGCCGACGGCGACGT	17	SUPV3L1	2
TTTCGATCTTCAGTCAGTCG	ACIN1	HGLibA_00439	TTTCGATCTTCAGTCAGTCG	17	ACIN1	1
ACACCTATCAATGACCTTCC	ADD3	HGLibA_00948	ACACCTATCAATGACCTTCC	17	ADD3	1
CACCCGCGAGTGTCCGTGCC	ANKRD65	HGLibA_02137	CACCCGCGAGTGTCCGTGCC	17	ANKRD65	1
TGTGCTGTGACGGGTAGACC	BAZ1A	HGLibA_04185	TGTGCTGTGACGGGTAGACC	17	BAZ1A	1
ACAGATGCACCGCGATGAAG	C9orf117	HGLibA_06667	ACAGATGCACCGCGATGAAG	17	C9orf117	1
CGGTGACGTTCCACGTGCCT	C9orf40	HGLibA_06727	CGGTGACGTTCCACGTGCCT	17	C9orf40	1
CCTGAACGTGCCGGCCATCG	CAMTA1	HGLibA_07115	CCTGAACGTGCCGGCCATCG	17	CAMTA1	1
CGTGTCGCTTTCGAGACCGC	CLEC14A	HGLibA_09934	CGTGTCGCTTTCGAGACCGC	17	CLEC14A	1
TTCCAATGCCCTGACCAACC	CNOT2	HGLibA_10336	TTCCAATGCCCTGACCAACC	17	CNOT2	1
CATCCTCTTCCTAAACTAGC	COIL	HGLibA_10494	CATCCTCTTCCTAAACTAGC	17	COIL	1
ATATTCGAGGACCCAGGCCT	COX16	HGLibA_10816	ATATTCGAGGACCCAGGCCT	17	COX16	1
CTCACGCCCATAGCACAAAA	CPOX	HGLibA_10983	CTCACGCCCATAGCACAAAA	17	CPOX	1
CCTGTCGGAGTGATAAGTCC	DACH2	HGLibA_12278	CCTGTCGGAGTGATAAGTCC	17	DACH2	1
TCTCGCTCATCATCGAAGCT	DLL4	HGLibA_13367	TCTCGCTCATCATCGAAGCT	17	DLL4	1
ACGTATATCACTTGAACAAC	DNAH11	HGLibA_13473	ACGTATATCACTTGAACAAC	17	DNAH11	1
GAGCAACCGCATGCCTGCCG	ENTPD1	HGLibA_15197	GAGCAACCGCATGCCTGCCG	17	ENTPD1	1
GTAAAGGGACAAACCATGTG	ERVV-1	HGLibA_15546	GTAAAGGGACAAACCATGTG	17	ERVV-1	1
TGGGTCCTCACTGGCTCCCT	FAM25G	HGLibA_16557	TGGGTCCTCACTGGCTCCCT	17	FAM25G	1
GCGCTTACCCGAGAGCAGAG	GCSH	HGLibA_18832	GCGCTTACCCGAGAGCAGAG	17	GCSH	1
ATGTCCGAAAGTGTCTCACG	GLRA3	HGLibA_19303	ATGTCCGAAAGTGTCTCACG	17	GLRA3	1
CAAGTGGGTCAGCACGTCCG	HEBP2	HGLibA_21087	CAAGTGGGTCAGCACGTCCG	17	HEBP2	1
TTCGTGAACCATCTGCGCTA	HRASLS2	HGLibA_22079	TTCGTGAACCATCTGCGCTA	17	HRASLS2	1
TTGTGCTTGATCTAACCATG	hsa-mir-218-1	HGLibA_23321	TTGTGCTTGATCTAACCATG	17	hsa-mir-218-1	1
GAGCTCACAGCTGAGAGTGT	hsa-mir-30c-1	HGLibA_23534	GAGCTCACAGCTGAGAGTGT	17	hsa-mir-30c-1	1
TATAAAGAAGCTAGTAATAT	hsa-mir-3923	HGLibA_24623	TATAAAGAAGCTAGTAATAT	17	hsa-mir-3923	1
CTGTTTCCTGTCTCAGGAAC	hsa-mir-4261	HGLibA_24804	CTGTTTCCTGTCTCAGGAAC	17	hsa-mir-4261	1
TGTGTTGAGAAGGATCATGA	hsa-mir-433	HGLibA_25099	TGTGTTGAGAAGGATCATGA	17	hsa-mir-433	1
AAAAATCAGGAACCTTAGTA	hsa-mir-4464	HGLibA_25315	AAAAATCAGGAACCTTAGTA	17	hsa-mir-4464	1
TGCTCTCTCACTCTCCCTAA	hsa-mir-4472-1	HGLibA_25347	TGCTCTCTCACTCTCCCTAA	17	hsa-mir-4472-1	1
GGCTCGGCTCTATCCTGAGA	hsa-mir-6770-1	HGLibA_28298	GGCTCGGCTCTATCCTGAGA	17	hsa-mir-6770-1	1
ATCGGCTTCATCCACGCCTT	IRF5	HGLibA_30880	ATCGGCTTCATCCACGCCTT	17	IRF5	1
ACCCACTATAGCGACCAGAT	MFAP2	HGLibA_36331	ACCCACTATAGCGACCAGAT	17	MFAP2	1
AGTATCTTGTTGAACGTAAA	MRPS22	HGLibA_37353	AGTATCTTGTTGAACGTAAA	17	MRPS22	1
TCCGCACGGCCGACCCGCTC	NEURL	HGLibA_39011	TCCGCACGGCCGACCCGCTC	17	NEURL	1
TAGAGATATCCGATCGTGGT	NonTargetingControlGuideForHuman_0156	HGLibA_64539	TAGAGATATCCGATCGTGGT	17	NonTargetingControlGuideForHuman_0156	1
ATCGGTACCTCTTCACATAT	NonTargetingControlGuideForHuman_0261	HGLibA_64644	ATCGGTACCTCTTCACATAT	17	NonTargetingControlGuideForHuman_0261	1
ATTGCAGATCTTCACCGCGT	NSMCE1	HGLibA_40053	ATTGCAGATCTTCACCGCGT	17	NSMCE1	1
GGAGTACTTACTGTTGCATT	NXPE4	HGLibA_40447	GGAGTACTTACTGTTGCATT	17	NXPE4	1
ATTGCCTTCTAGTGAGTTCC	NXT2	HGLibA_40465	ATTGCCTTCTAGTGAGTTCC	17	NXT2	1
TCTTGTCCTGAAAGCTATGT	OR11H1	HGLibA_40856	TCTTGTCCTGAAAGCTATGT	17	OR11H1	1
CGAGGCGTGTTCACCCAATT	PALLD	HGLibA_42352	CGAGGCGTGTTCACCCAATT	17	PALLD	1
TGATACTCCAGATCCCTATG	PLA2G4A	HGLibA_44188	TGATACTCCAGATCCCTATG	17	PLA2G4A	1
AGTGATGCCCACGATTAATG	PPFIA2	HGLibA_45163	AGTGATGCCCACGATTAATG	17	PPFIA2	1
CATCCGTGATGTCGTATACT	RAB13	HGLibA_47099	CATCCGTGATGTCGTATACT	17	RAB13	1
CCTGCACACCTGACCGTATC	RABEPK	HGLibA_47293	CCTGCACACCTGACCGTATC	17	RABEPK	1
TTTGTTGTAGGGTACACAAC	RGS22	HGLibA_48377	TTTGTTGTAGGGTACACAAC	17	RGS22	1
TGAAAAGCTCCACCTGGTCG	RNF152	HGLibA_48838	TGAAAAGCTCCACCTGGTCG	17	RNF152	1
CCTGCTCACAGCCCGACGAA	RPL38	HGLibA_49259	CCTGCTCACAGCCCGACGAA	17	RPL38	1
TGTCGCAGACAAAGAAAAGA	RPS26	HGLibA_49408	TGTCGCAGACAAAGAAAAGA	17	RPS26	1
AGATCACTTACCTCCCCGCA	SAMD13	HGLibA_49959	AGATCACTTACCTCCCCGCA	17	SAMD13	1
AGCATATCGGTATCTCCAAA	SEL1L	HGLibA_50565	AGCATATCGGTATCTCCAAA	17	SEL1L	1
GCGTGGTCCGCACGATGACG	SIPA1	HGLibA_51476	GCGTGGTCCGCACGATGACG	17	SIPA1	1
TGAAAGTACGCTTCCTCAGT	SLC39A12	HGLibA_52385	TGAAAGTACGCTTCCTCAGT	17	SLC39A12	1
CAGCGGCTTCCATTCTCGTT	SLC44A1	HGLibA_52446	CAGCGGCTTCCATTCTCGTT	17	SLC44A1	1
TCTCGTGTATGGCGTGGTTA	SLC8A3	HGLibA_52681	TCTCGTGTATGGCGTGGTTA	17	SLC8A3	1
TCTTCAGGCTCCGTGATACC	SNRPA	HGLibA_53250	TCTTCAGGCTCCGTGATACC	17	SNRPA	1
CTCAAGTACCTGCGACGAGG	SRSF3	HGLibA_54363	CTCAAGTACCTGCGACGAGG	17	SRSF3	1
ACCGCCATCCTTTCATTGAG	SULT1C2	HGLibA_55034	ACCGCCATCCTTTCATTGAG	17	SULT1C2	1
TCGTCCGTAGCCTGTCATGC	TAGLN	HGLibA_55558	TCGTCCGTAGCCTGTCATGC	17	TAGLN	1
CTGTATCAACTTACAACAGC	TMEM41B	HGLibA_57685	CTGTATCAACTTACAACAGC	17	TMEM41B	1
ACCGTGTGGGTTGTAGCAAT	TNFAIP6	HGLibA_58003	ACCGTGTGGGTTGTAGCAAT	17	TNFAIP6	1
GGCCTCATAGGAGCGCCGCA	TRIM35	HGLibA_58759	GGCCTCATAGGAGCGCCGCA	17	TRIM35	1
CCGTGAACTCGTGAGTCTGC	VSIG10L	HGLibA_61131	CCGTGAACTCGTGAGTCTGC	17	VSIG10L	1
CGCTATCTTGGAGCCATTGC	ZFPL1	HGLibA_62537	CGCTATCTTGGAGCCATTGC	17	ZFPL1	1
CATTAGCCGACTGCATTCTG	ZNF410	HGLibA_63223	CATTAGCCGACTGCATTCTG	17	ZNF410	1
ACCGAGGCAAAGTCGTGCTT	ZNF827	HGLibA_64111	ACCGAGGCAAAGTCGTGCTT	17	ZNF827	1
CCCTTTCAGATCCTACGCTA	ERG	HGLibA_15465	CCCTTTCAGATCCTACGCTA	17
ACTCATCACCAGATACTTTC	FAM188B	HGLibA_16349	ACTCATCACCAGATACTTTC	17
GGCCCTGCTGTAGACTCCCG	hsa-mir-4294	HGLibA_24940	GGCCCTGCTGTAGACTCCCG	17
CGTAGGCGTTGGCTGTGTCA	AGBL1	HGLibA_01165	CGTAGGCGTTGGCTGTGTCA	16	AGBL1	2
CAACTCTGGTCGATGAAAAG	AKR1C3	HGLibA_01487	CAACTCTGGTCGATGAAAAG	16	AKR1C3	2
AAGCCTTCTTATTGACTCCT	APOM	HGLibA_02549	AAGCCTTCTTATTGACTCCT	16	APOM	2
ACTGTCAGCCATGTATGCAG	MS4A2	HGLibA_37433	ACTGTCAGCCATGTATGCAG	16	MS4A2	2
TTGCAGGAATCCAACCACCC	SH3D19	HGLibA_51229	TTGCAGGAATCCAACCACCC	16	SH3D19	2
GCGGACACCATTGATGCTAC	TRIM32	HGLibA_58750	GCGGACACCATTGATGCTAC	16	TRIM32	2
CCAGCGTTGACTGTGTCAAA	UBE2D4	HGLibA_59880	CCAGCGTTGACTGTGTCAAA	16	UBE2D4	2
CAAGGCCACACTAGTCGTGT	WNT8A	HGLibA_61676	CAAGGCCACACTAGTCGTGT	16	WNT8A	2
TGTCCCCCATCAAGTGTACG	AMICA1	HGLibA_01789	TGTCCCCCATCAAGTGTACG	16	AMICA1	1
ACTGTCCATCTTGTTCCGCA	AMOTL2	HGLibA_01819	ACTGTCCATCTTGTTCCGCA	16	AMOTL2	1
CGCCATGTAAAGCCTGTCAA	ATL2	HGLibA_03518	CGCCATGTAAAGCCTGTCAA	16	ATL2	1
TGTCATGATGAATACACCTG	BIRC2	HGLibA_04515	TGTCATGATGAATACACCTG	16	BIRC2	1
CGGGGAATACAACACTTATG	BIVM	HGLibA_04532	CGGGGAATACAACACTTATG	16	BIVM	1
GTATTATCTAAGTACCGCAG	BYSL	HGLibA_05008	GTATTATCTAAGTACCGCAG	16	BYSL	1
AGAATCAAGGCGCAGGCGTT	C11orf70	HGLibA_05175	AGAATCAAGGCGCAGGCGTT	16	C11orf70	1
TTGTTTGACACTGTCGCACG	C16orf52	HGLibA_05452	TTGTTTGACACTGTCGCACG	16	C16orf52	1
TTCAAGATGCTGTTCTAGTT	CCDC6	HGLibA_07812	TTCAAGATGCTGTTCTAGTT	16	CCDC6	1
GACACCCAACGGCTACACGC	CKMT2	HGLibA_09783	GACACCCAACGGCTACACGC	16	CKMT2	1
GGTAAATCACTGTATGGTCC	CMTM8	HGLibA_10229	GGTAAATCACTGTATGGTCC	16	CMTM8	1
TTCTTCCGACTCCCCGCCAT	CXCL16	HGLibA_11861	TTCTTCCGACTCCCCGCCAT	16	CXCL16	1
CCCAGGGCGACGTCTTCGCA	DEAF1	HGLibA_12768	CCCAGGGCGACGTCTTCGCA	16	DEAF1	1
TGCCTACTGTATGTTTCAGC	DEFB134	HGLibA_12904	TGCCTACTGTATGTTTCAGC	16	DEFB134	1
ATCTTTGCACACCTCGACTT	DGCR8	HGLibA_13056	ATCTTTGCACACCTCGACTT	16	DGCR8	1
TTCTCCGATAACTCAGCCGC	DIRC2	HGLibA_13267	TTCTCCGATAACTCAGCCGC	16	DIRC2	1
AGTGGAGGGCGTTGTTCTCC	DOC2B	HGLibA_13729	AGTGGAGGGCGTTGTTCTCC	16	DOC2B	1
CTATCACTTACCAATAAGCC	EIF2S3	HGLibA_14759	CTATCACTTACCAATAAGCC	16	EIF2S3	1
TTACCTGAGGCATAAAAGTC	EPT1	HGLibA_15389	TTACCTGAGGCATAAAAGTC	16	EPT1	1
GTGTAATGACAAGTTCGCCG	FZD1	HGLibA_18260	GTGTAATGACAAGTTCGCCG	16	FZD1	1
GAAAGCGAAGTACATTCCCG	GDF3	HGLibA_18866	GAAAGCGAAGTACATTCCCG	16	GDF3	1
CCAAAGATCGTGTCGCCACC	HINT1	HGLibA_21323	CCAAAGATCGTGTCGCCACC	16	HINT1	1
ACGGTTGGAATGGCCCTACC	HPSE	HGLibA_22061	ACGGTTGGAATGGCCCTACC	16	HPSE	1
AGCCATCAAGTCGCTGCAGG	hsa-mir-1184-3	HGLibA_22293	AGCCATCAAGTCGCTGCAGG	16	hsa-mir-1184-3	1
CCACCCCCACCACCACGCCC	hsa-mir-1268b	HGLibA_22555	CCACCCCCACCACCACGCCC	16	hsa-mir-1268b	1
TGTGTCTCCTCTTTTCTTCT	hsa-mir-3916	HGLibA_24594	TGTGTCTCCTCTTTTCTTCT	16	hsa-mir-3916	1
GCCACTGGGAATGCTCCCTG	hsa-mir-4319	HGLibA_25050	GCCACTGGGAATGCTCCCTG	16	hsa-mir-4319	1
CAGATGTTCATACCAAGAGC	hsa-mir-4420	HGLibA_25123	CAGATGTTCATACCAAGAGC	16	hsa-mir-4420	1
CGAAGCTGCCTTTAGAAATG	hsa-mir-4496	HGLibA_25455	CGAAGCTGCCTTTAGAAATG	16	hsa-mir-4496	1
CTGCTGTGCTGTGCTGAGCA	hsa-mir-4539	HGLibA_25672	CTGCTGTGCTGTGCTGAGCA	16	hsa-mir-4539	1
ACTGTGCTGGTCGCGGGTTG	hsa-mir-5091	HGLibA_26578	ACTGTGCTGGTCGCGGGTTG	16	hsa-mir-5091	1
GCGCTAGTTTGTTTGTGTTA	hsa-mir-6077-1	HGLibA_27614	GCGCTAGTTTGTTTGTGTTA	16	hsa-mir-6077-1	1
CAGCCTCCGTCCGCTAAGTA	IDH3G	HGLibA_29839	CAGCCTCCGTCCGCTAAGTA	16	IDH3G	1
GCCAGTGCACGCGCGTCGCA	IGFBP3	HGLibA_30108	GCCAGTGCACGCGCGTCGCA	16	IGFBP3	1
TCGTCTTATCTCGGGCCGTG	IL27	HGLibA_30399	TCGTCTTATCTCGGGCCGTG	16	IL27	1
TGCTAGCACGTTGCGATTGC	KBTBD7	HGLibA_31401	TGCTAGCACGTTGCGATTGC	16	KBTBD7	1
CGCTATCTCCTCCTTGAGCG	KCNS3	HGLibA_31679	CGCTATCTCCTCCTTGAGCG	16	KCNS3	1
GAAGCTCCACGCGCCTCGTC	KLF14	HGLibA_32342	GAAGCTCCACGCGCCTCGTC	16	KLF14	1
TTGTCCCAGCCGTCAAACCG	LGALS4	HGLibA_33657	TTGTCCCAGCCGTCAAACCG	16	LGALS4	1
GTTCTACTGCCCACATCCGC	LRRC27	HGLibA_34585	GTTCTACTGCCCACATCCGC	16	LRRC27	1
ACTCGCAATAGCACTGATTG	MBD3L1	HGLibA_35759	ACTCGCAATAGCACTGATTG	16	MBD3L1	1
TGCCTGGGCTCGGGAGATAT	MEA1	HGLibA_36007	TGCCTGGGCTCGGGAGATAT	16	MEA1	1
ATGGCTGACCGATAGAAAGT	MTUS2	HGLibA_37797	ATGGCTGACCGATAGAAAGT	16	MTUS2	1
CATCTCAGAGTCGGAACTCA	MYH1	HGLibA_37991	CATCTCAGAGTCGGAACTCA	16	MYH1	1
ATACTCTCACAGGTACATAA	NonTargetingControlGuideForHuman_0836	HGLibA_65219	ATACTCTCACAGGTACATAA	16	NonTargetingControlGuideForHuman_0836	1
CTTCATCAATGTGACCCGCG	NPC1L1	HGLibA_39708	CTTCATCAATGTGACCCGCG	16	NPC1L1	1
CCATGGCCTAGCGTTCCCTG	NUTM2F	HGLibA_40396	CCATGGCCTAGCGTTCCCTG	16	NUTM2F	1
AGTAGTCTTCTCCATCTTTG	OR2T35	HGLibA_41170	AGTAGTCTTCTCCATCTTTG	16	OR2T35	1
CCCTCTGTGTTGACACTAGT	OR52A1	HGLibA_41426	CCCTCTGTGTTGACACTAGT	16	OR52A1	1
CCGCGACAGGCAGTCCGCTG	PDYN	HGLibA_43255	CCGCGACAGGCAGTCCGCTG	16	PDYN	1
GACACGAACCGAGCAAGCGT	PLXDC2	HGLibA_44542	GACACGAACCGAGCAAGCGT	16	PLXDC2	1
GCGAAGCCCATTATCCAATG	PMPCA	HGLibA_44616	GCGAAGCCCATTATCCAATG	16	PMPCA	1
ATGACTTCATGGCCCGACTA	PNPLA4	HGLibA_44701	ATGACTTCATGGCCCGACTA	16	PNPLA4	1
TCGTGAAGACCTCTGTACCA	PSME1	HGLibA_46477	TCGTGAAGACCTCTGTACCA	16	PSME1	1
TTTCTCCACAGCATACACGT	RCCD1	HGLibA_47978	TTTCTCCACAGCATACACGT	16	RCCD1	1
GGAGTACTGGCAAGTTCGAG	RGS16	HGLibA_48356	GGAGTACTGGCAAGTTCGAG	16	RGS16	1
CTCACTCACCGTCTTCTTTG	RPL30	HGLibA_49222	CTCACTCACCGTCTTCTTTG	16	RPL30	1
CAGTACCACTTCCGCTGTCA	RPL37A	HGLibA_49256	CAGTACCACTTCCGCTGTCA	16	RPL37A	1
TCTGGGCTGCTAAACTCATC	SAA2-SAA4	HGLibA_49903	TCTGGGCTGCTAAACTCATC	16	SAA2-SAA4	1
TAACCGTGTGACCGCTGAAG	SGMS2	HGLibA_51126	TAACCGTGTGACCGCTGAAG	16	SGMS2	1
GCAGTTCCATCGAGTCAAAA	SH2B1	HGLibA_51163	GCAGTTCCATCGAGTCAAAA	16	SH2B1	1
CACTTACCATAAGCTGTTCC	SH3GLB1	HGLibA_51242	CACTTACCATAAGCTGTTCC	16	SH3GLB1	1
CCACTCTTACCTGTTCATAG	SMU1	HGLibA_53128	CCACTCTTACCTGTTCATAG	16	SMU1	1
ATGTCTGAAAGAGTCCCCAC	SRRD	HGLibA_54331	ATGTCTGAAAGAGTCCCCAC	16	SRRD	1
GTCCTGAATCTCCGCACTGC	TGFBR3	HGLibA_56517	GTCCTGAATCTCCGCACTGC	16	TGFBR3	1
TCTTTGCGCTCGTCCTCATC	TGM4	HGLibA_56550	TCTTTGCGCTCGTCCTCATC	16	TGM4	1
AGGCATGAGCTGCACGTAAG	TIMM10B	HGLibA_56785	AGGCATGAGCTGCACGTAAG	16	TIMM10B	1
TGCCAAAAATTTCGCCATTG	TIMM22	HGLibA_56799	TGCCAAAAATTTCGCCATTG	16	TIMM22	1
GAAGGCATCCTGCTGCGGCC	TMEM241	HGLibA_57576	GAAGGCATCCTGCTGCGGCC	16	TMEM241	1
CATGAAACCCTGAGTCACGC	TPD52L1	HGLibA_58401	CATGAAACCCTGAGTCACGC	16	TPD52L1	1
ACCTTCCCTAGTGTTTACAT	TRIM16L	HGLibA_58708	ACCTTCCCTAGTGTTTACAT	16	TRIM16L	1
CCAGGTGCATGTCCGTTCCG	UBD	HGLibA_59857	CCAGGTGCATGTCCGTTCCG	16	UBD	1
ACTCACCGTGGCCGGAGACG	VSTM2L	HGLibA_61155	ACTCACCGTGGCCGGAGACG	16	VSTM2L	1
CCGTACGATTGCACTCACTG	ZNF544	HGLibA_63486	CCGTACGATTGCACTCACTG	16	ZNF544	1
TGTGGCTATAGAGTTCTCTT	ZNF816	HGLibA_64101	TGTGGCTATAGAGTTCTCTT	16	ZNF816	1
GTATATAAGACCTTACCCCT	ZSWIM1	HGLibA_64326	GTATATAAGACCTTACCCCT	16	ZSWIM1	1
CCACACCCGTCTCACATCTG	ZUFSP	HGLibA_64350	CCACACCCGTCTCACATCTG	16	ZUFSP	1
CTCCACCCAGAGTTGTGAAC	CASC1	HGLibA_07268	CTCCACCCAGAGTTGTGAAC	16
GAATGTGGTTGTGGTGGGAT	hsa-mir-4316	HGLibA_25036	GAATGTGGTTGTGGTGGGAT	16
AGCCGCCAGCGTCATCAACC	NOC4L	HGLibA_39529	AGCCGCCAGCGTCATCAACC	16
CATCGCGGATTTGCACCCCG	SFMBT2	HGLibA_51011	CATCGCGGATTTGCACCCCG	16
CGTAGGTGTTGGTGGCAATC	SLC41A3	HGLibA_52434	CGTAGGTGTTGGTGGCAATC	16
CACAGCTTGCCCGCCAGCGC	ADAM15	HGLibA_00738	CACAGCTTGCCCGCCAGCGC	15	ADAM15	2
CCAAAGAAATCCGTAATATT	ANKRD36	HGLibA_02088	CCAAAGAAATCCGTAATATT	15	ANKRD36	2
GCGGGCAACCCCCATCAACT	ELL	HGLibA_14920	GCGGGCAACCCCCATCAACT	15	ELL	2
GCTTATGAGTTTGTTCGTAA	NAA16	HGLibA_38266	GCTTATGAGTTTGTTCGTAA	15	NAA16	2
GCATGGCTACAATGTGGAAC	RCOR3	HGLibA_48005	GCATGGCTACAATGTGGAAC	15	RCOR3	2
ATTATAAATACCGGCCCCGG	SOX2	HGLibA_53539	ATTATAAATACCGGCCCCGG	15	SOX2	2
TTGTACACCACTCTTTGTAC	SP140L	HGLibA_53583	TTGTACACCACTCTTTGTAC	15	SP140L	2
GCCACCGATATAGCGCTGTT	TGFB3	HGLibA_56504	GCCACCGATATAGCGCTGTT	15	TGFB3	2
CGGAGAGCGCATTGCCTATG	ABP1	HGLibA_00321	CGGAGAGCGCATTGCCTATG	15	ABP1	1
GGGACACGTAATCGCCCCTG	ADAMTS16	HGLibA_00809	GGGACACGTAATCGCCCCTG	15	ADAMTS16	1
CTGATAGATCATTGCCACTG	ADH5	HGLibA_00958	CTGATAGATCATTGCCACTG	15	ADH5	1
AGGGCCGGTAGAACATCCTC	APCDD1	HGLibA_02394	AGGGCCGGTAGAACATCCTC	15	APCDD1	1
ACAGAGGCTGATGGACAACC	APOL6	HGLibA_02543	ACAGAGGCTGATGGACAACC	15	APOL6	1
TGCCTTCTTCAACCCTGCCC	AQP12B	HGLibA_02588	TGCCTTCTTCAACCCTGCCC	15	AQP12B	1
TTGAACGAGAAGTTCTCCGA	ARGLU1	HGLibA_02695	TTGAACGAGAAGTTCTCCGA	15	ARGLU1	1
AAACCAAAGAGCCGAAGAAC	ATP2C1	HGLibA_03626	AAACCAAAGAGCCGAAGAAC	15	ATP2C1	1
CTTCTTACAGAGAGTGTATA	ATP6AP2	HGLibA_03699	CTTCTTACAGAGAGTGTATA	15	ATP6AP2	1
GCCTCCAAGTCGTCCTGCGC	BRAT1	HGLibA_04759	GCCTCCAAGTCGTCCTGCGC	15	BRAT1	1
CCAAACAAGTGTTTCCTCGA	C3orf38	HGLibA_06243	CCAAACAAGTGTTTCCTCGA	15	C3orf38	1
CTTGGTTCCGGTCGCTACTG	C8orf37	HGLibA_06613	CTTGGTTCCGGTCGCTACTG	15	C8orf37	1
TTCGCACACGGCGCTGCCGT	CACNG6	HGLibA_06945	TTCGCACACGGCGCTGCCGT	15	CACNG6	1
GACACATTCTAATCTGCTCC	CAGE1	HGLibA_06984	GACACATTCTAATCTGCTCC	15	CAGE1	1
GATGGCCAGGTCAATTATGA	CALM3	HGLibA_07029	GATGGCCAGGTCAATTATGA	15	CALM3	1
ATTTCGGGACGTCCCGCGGC	CDKN1C	HGLibA_08828	ATTTCGGGACGTCCCGCGGC	15	CDKN1C	1
TACTCCTTGATGAAGAATCG	CDKN2AIP	HGLibA_08833	TACTCCTTGATGAAGAATCG	15	CDKN2AIP	1
TAGGTCTCGCAGGCTGTCTA	CDKN3	HGLibA_08847	TAGGTCTCGCAGGCTGTCTA	15	CDKN3	1
TATCCGTACGGCGGCAGCTC	CELSR3	HGLibA_09028	TATCCGTACGGCGGCAGCTC	15	CELSR3	1
TCTTACCGCACCTCATGAAC	CHD3	HGLibA_09391	TCTTACCGCACCTCATGAAC	15	CHD3	1
CCCCACTTCACCTCGTACGC	CISD1	HGLibA_09726	CCCCACTTCACCTCGTACGC	15	CISD1	1
CTTCCTGTATAGAGCGTACC	COPE	HGLibA_10700	CTTCCTGTATAGAGCGTACC	15	COPE	1
ACTCCCGCCTGTTTGTAGTC	CRY2	HGLibA_11244	ACTCCCGCCTGTTTGTAGTC	15	CRY2	1
CCTAAAAGATGGCCCTGATC	DEFB105A	HGLibA_12824	CCTAAAAGATGGCCCTGATC	15	DEFB105A	1
TTACCGTAGTCTGTAGTCCT	DMBT1	HGLibA_13392	TTACCGTAGTCTGTAGTCCT	15	DMBT1	1
GTGTTCCTACACACTCCATC	DOK5	HGLibA_13780	GTGTTCCTACACACTCCATC	15	DOK5	1
CAACGTCTTCATCGTGTCTC	DRD5	HGLibA_13972	CAACGTCTTCATCGTGTCTC	15	DRD5	1
CGAGCGCGCCTAGATCCACT	DSCR6	HGLibA_14014	CGAGCGCGCCTAGATCCACT	15	DSCR6	1
AAGTCCGCTGGCAGTGCAAC	EFNA1	HGLibA_14581	AAGTCCGCTGGCAGTGCAAC	15	EFNA1	1
CTTTCGTATTGCCTATCTCG	ENTPD7	HGLibA_15215	CTTTCGTATTGCCTATCTCG	15	ENTPD7	1
GGCTTACGAAGACGACGTGC	FAM83H	HGLibA_16761	GGCTTACGAAGACGACGTGC	15	FAM83H	1
CCCCCATCCAGTGTCGACCC	FOLR1	HGLibA_17783	CCCCCATCCAGTGTCGACCC	15	FOLR1	1
AGCTCCGTCCGCAGTAACGA	FRZB	HGLibA_18058	AGCTCCGTCCGCAGTAACGA	15	FRZB	1
ATTGATCAGGGGCCAGCTAT	FUT8	HGLibA_18206	ATTGATCAGGGGCCAGCTAT	15	FUT8	1
AAGTTGTTGAGTAAGACGTC	FYB	HGLibA_18247	AAGTTGTTGAGTAAGACGTC	15	FYB	1
AGTCAGTTCAACGTCGAGGT	GABRP	HGLibA_18397	AGTCAGTTCAACGTCGAGGT	15	GABRP	1
TAGAAGAGATTGAATCTCGA	GCFC2	HGLibA_18772	TAGAAGAGATTGAATCTCGA	15	GCFC2	1
TAGTTGGCCTTGTAGCGCTT	GDF11	HGLibA_18856	TAGTTGGCCTTGTAGCGCTT	15	GDF11	1
AAAGCCTCACCGTTACCGCC	HIST1H3B	HGLibA_21458	AAAGCCTCACCGTTACCGCC	15	HIST1H3B	1
CAGTTATACCTGGTCTGTTT	HMGN2	HGLibA_21720	CAGTTATACCTGGTCTGTTT	15	HMGN2	1
CGTGTCCAGTCCCGAAGTGC	HOXD10	HGLibA_21986	CGTGTCCAGTCCCGAAGTGC	15	HOXD10	1
CATAGCATTGTATGTTCATA	hsa-mir-1-2	HGLibA_22198	CATAGCATTGTATGTTCATA	15	hsa-mir-1-2	1
GGACGAAATCCAAGCGCAGC	hsa-mir-191	HGLibA_23096	GGACGAAATCCAAGCGCAGC	15	hsa-mir-191	1
CAATGCCTGGTGGGAGACTG	hsa-mir-1911	HGLibA_23104	CAATGCCTGGTGGGAGACTG	15	hsa-mir-1911	1
ATGTCAGACAGCCCATCGAC	hsa-mir-21	HGLibA_23263	ATGTCAGACAGCCCATCGAC	15	hsa-mir-21	1
AACTGCATGGCATCGTCCCC	hsa-mir-4642	HGLibA_25726	AACTGCATGGCATCGTCCCC	15	hsa-mir-4642	1
ACTTCATCCACCAGTCCTCC	hsa-mir-561	HGLibA_27260	ACTTCATCCACCAGTCCTCC	15	hsa-mir-561	1
CTTTTCCCCTCAGGAGAAGT	hsa-mir-5703	HGLibA_27405	CTTTTCCCCTCAGGAGAAGT	15	hsa-mir-5703	1
TCACGCTGCTGGCGCAGGCT	hsa-mir-6068	HGLibA_27573	TCACGCTGCTGGCGCAGGCT	15	hsa-mir-6068	1
TGTTTGCACTCTGCCAGTTT	hsa-mir-759	HGLibA_28950	TGTTTGCACTCTGCCAGTTT	15	hsa-mir-759	1
TTGCACTCTGGCCTTCTCCC	hsa-mir-7703	HGLibA_29002	TTGCACTCTGGCCTTCTCCC	15	hsa-mir-7703	1
TTGTTCAGTGGGATTTGGAG	hsa-mir-8061	HGLibA_29137	TTGTTCAGTGGGATTTGGAG	15	hsa-mir-8061	1
GCTACGTGCAACTGACGTCG	HSD11B1L	HGLibA_29450	GCTACGTGCAACTGACGTCG	15	HSD11B1L	1
ATAGGAATCCAGAAACGTTT	HSPB11	HGLibA_29592	ATAGGAATCCAGAAACGTTT	15	HSPB11	1
GAGAATTACCCTTGACCCTT	IL18R1	HGLibA_30315	GAGAATTACCCTTGACCCTT	15	IL18R1	1
GACGTGCAGGATTCTCGAAC	KCNJ16	HGLibA_31556	GACGTGCAGGATTCTCGAAC	15	KCNJ16	1
TGAACGCTTTGTGTCCAGCC	KIF5A	HGLibA_32237	TGAACGCTTTGTGTCCAGCC	15	KIF5A	1
CCTCCCGCTTGCCGAAGCGC	KISS1	HGLibA_32296	CCTCCCGCTTGCCGAAGCGC	15	KISS1	1
CATGAGCCAGATCCGCAAGT	KLC2	HGLibA_32317	CATGAGCCAGATCCGCAAGT	15	KLC2	1
CTGGGCAGGTCATCATAGTA	LGALS12	HGLibA_33636	CTGGGCAGGTCATCATAGTA	15	LGALS12	1
TAAAGTCGACGCTGCAGCGC	LTA4H	HGLibA_34866	TAAAGTCGACGCTGCAGCGC	15	LTA4H	1
TGATCACTTGCTGCAGTTTG	MAGI3	HGLibA_35289	TGATCACTTGCTGCAGTTTG	15	MAGI3	1
CCCCCAGGTGATCGGGCTGC	MAPK12	HGLibA_35545	CCCCCAGGTGATCGGGCTGC	15	MAPK12	1
GCAGACTATCCGTTGCCTGC	MEI1	HGLibA_36150	GCAGACTATCCGTTGCCTGC	15	MEI1	1
CCTTCGTGTGCACTCGCACG	MTF1	HGLibA_37636	CCTTCGTGTGCACTCGCACG	15	MTF1	1
GTTCGGCCCCTCAGGGCCAT	MYOZ3	HGLibA_38195	GTTCGGCCCCTCAGGGCCAT	15	MYOZ3	1
AGAAGACCGAGGCGCTTCAA	NonTargetingControlGuideForHuman_0290	HGLibA_64673	AGAAGACCGAGGCGCTTCAA	15	NonTargetingControlGuideForHuman_0290	1
TAGCTCGAGTCATTTCTCTA	NonTargetingControlGuideForHuman_0571	HGLibA_64954	TAGCTCGAGTCATTTCTCTA	15	NonTargetingControlGuideForHuman_0571	1
ATGCGCAGCTCCAGAATTTT	NonTargetingControlGuideForHuman_0674	HGLibA_65057	ATGCGCAGCTCCAGAATTTT	15	NonTargetingControlGuideForHuman_0674	1
GTCACTGAATACTGTCCTCG	NPR2	HGLibA_39799	GTCACTGAATACTGTCCTCG	15	NPR2	1
CAGAACTGGTTTCACACCGA	NRG1	HGLibA_39963	CAGAACTGGTTTCACACCGA	15	NRG1	1
AATTGCATTGTTGTCCACTT	NUDT2	HGLibA_40255	AATTGCATTGTTGTCCACTT	15	NUDT2	1
ATGAATGAAGCCCCCCCTCC	OR4M2	HGLibA_41331	ATGAATGAAGCCCCCCCTCC	15	OR4M2	1
ACTCTCTCGCTCAGATACAC	OR5W2	HGLibA_41655	ACTCTCTCGCTCAGATACAC	15	OR5W2	1
CTTAGGCGGATCCTCTTGCG	OSR2	HGLibA_41990	CTTAGGCGGATCCTCTTGCG	15	OSR2	1
TCCTAGATGCAAACTGCAGT	PAIP1	HGLibA_42316	TCCTAGATGCAAACTGCAGT	15	PAIP1	1
GGCAGTCCATCTGGTAGGAC	PID1	HGLibA_43816	GGCAGTCCATCTGGTAGGAC	15	PID1	1
CGATTGACAATGCCATCGAT	POLR3GL	HGLibA_44918	CGATTGACAATGCCATCGAT	15	POLR3GL	1
CAGCATACAGCTTTATCCGC	PRMT5	HGLibA_45917	CAGCATACAGCTTTATCCGC	15	PRMT5	1
AGCAACCGTCTCACAGCTAA	PYHIN1	HGLibA_46989	AGCAACCGTCTCACAGCTAA	15	PYHIN1	1
AGTAGACTACACAACAGCGA	RAB1A	HGLibA_47117	AGTAGACTACACAACAGCGA	15	RAB1A	1
ACTTACCCTGTAACATTCAA	RGPD2	HGLibA_48316	ACTTACCCTGTAACATTCAA	15	RGPD2	1
GTGAACCGCTGCATACTGTG	RPH3A	HGLibA_49132	GTGAACCGCTGCATACTGTG	15	RPH3A	1
GGTGTCATACCTGGTTGGCC	RYR3	HGLibA_49815	GGTGTCATACCTGGTTGGCC	15	RYR3	1
TTATTCGTAGAACGTTTAGA	SLC25A14	HGLibA_51937	TTATTCGTAGAACGTTTAGA	15	SLC25A14	1
CATACTTCACGCCGTTGAGC	SLC45A1	HGLibA_52459	CATACTTCACGCCGTTGAGC	15	SLC45A1	1
AGGTCATAGAGCGCCCCGCC	SLC5A3	HGLibA_52555	AGGTCATAGAGCGCCCCGCC	15	SLC5A3	1
TGTGCACATAGTAGCCTGTG	SMIM1	HGLibA_53005	TGTGCACATAGTAGCCTGTG	15	SMIM1	1
AGACCGAGTTCTCAGTCGTG	SNX32	HGLibA_53377	AGACCGAGTTCTCAGTCGTG	15	SNX32	1
CTCTGAACCAAGTTGTCCTA	SPCS3	HGLibA_53852	CTCTGAACCAAGTTGTCCTA	15	SPCS3	1
CCACATCTTGAGATGCATAC	STARD9	HGLibA_54666	CCACATCTTGAGATGCATAC	15	STARD9	1
CATCGATGTTACCCACGCTC	STIP1	HGLibA_54734	CATCGATGTTACCCACGCTC	15	STIP1	1
TCTGCTCTTGCAACCCCTAT	TCERG1L	HGLibA_56047	TCTGCTCTTGCAACCCCTAT	15	TCERG1L	1
ATACTCGTGCAGGGTCTCCC	TENM1	HGLibA_56283	ATACTCGTGCAGGGTCTCCC	15	TENM1	1
TGCTGCAGGTGGTAGCGCGT	TFE3	HGLibA_56448	TGCTGCAGGTGGTAGCGCGT	15	TFE3	1
GACCTATACAACAGATTATA	TIPRL	HGLibA_56851	GACCTATACAACAGATTATA	15	TIPRL	1
CTGTACTATGTCGATTCGAC	TMCO1	HGLibA_57068	CTGTACTATGTCGATTCGAC	15	TMCO1	1
TGAGTTCTCCCGTTTACATC	TMEM14E	HGLibA_57277	TGAGTTCTCCCGTTTACATC	15	TMEM14E	1
TCCATAGTTTACGGTGGGGA	TMEM171	HGLibA_57349	TCCATAGTTTACGGTGGGGA	15	TMEM171	1
GAACACACTCTTTCTCTTGC	TMSB15A	HGLibA_57948	GAACACACTCTTTCTCTTGC	15	TMSB15A	1
GAAGCTCTGTCAGTCTCGTC	TP53AIP1	HGLibA_58339	GAAGCTCTGTCAGTCTCGTC	15	TP53AIP1	1
GCCCGCTACAACCGCTTCTC	TRAF7	HGLibA_58556	GCCCGCTACAACCGCTTCTC	15	TRAF7	1
GAGATAGTCATAACTCTCTT	VPS29	HGLibA_61050	GAGATAGTCATAACTCTCTT	15	VPS29	1
GATCCTGTACGGCAGCAGTC	WWP1	HGLibA_61739	GATCCTGTACGGCAGCAGTC	15	WWP1	1
TTATTGTCCTCGTCGTGCTC	ZDHHC15	HGLibA_62368	TTATTGTCCTCGTCGTGCTC	15	ZDHHC15	1
AAGGTATGACCCCCTGTTAA	ZNF519	HGLibA_63443	AAGGTATGACCCCCTGTTAA	15	ZNF519	1
CGATCCCATAAATGTGGCAC	ZNF605	HGLibA_63653	CGATCCCATAAATGTGGCAC	15	ZNF605	1
TGGATCTACCACCTGACTGA	APOM	HGLibA_02548	TGGATCTACCACCTGACTGA	15
GGACCGTGCACTCCTCGATG	CELF6	HGLibA_09019	GGACCGTGCACTCCTCGATG	15
TGACACCATGGTTGCGGCAG	DMRTC2	HGLibA_13441	TGACACCATGGTTGCGGCAG	15
TCTCAGGTGCTCTGGCTGCT	hsa-mir-23b	HGLibA_23386	TCTCAGGTGCTCTGGCTGCT	15
ATGGTGGTAGTAGCAACCAA	IL1A	HGLibA_30326	ATGGTGGTAGTAGCAACCAA	15
AGGGCGTACGTACGACACGA	MTMR12	HGLibA_37705	AGGGCGTACGTACGACACGA	15
TTCGTACATCATATGATCAA	PPP1R13B	HGLibA_45316	TTCGTACATCATATGATCAA	15
CTACCTGCAAACCACCTTCG	SLC22A18	HGLibA_51850	CTACCTGCAAACCACCTTCG	15
ACTTGTTGACACTTCTCCTC	PCID2	HGLibA_42896	ACTTGTTGACACTTCTCCTC	14	PCID2	3
GAAGCAGTTACCTCGCCTGT	ANKMY1	HGLibA_01980	GAAGCAGTTACCTCGCCTGT	14	ANKMY1	2
GATGCATATATCAGACCTGC	APOOL	HGLibA_02555	GATGCATATATCAGACCTGC	14	APOOL	2
CGCGAAGCTCTTGCCAAAGC	MVB12A	HGLibA_37878	CGCGAAGCTCTTGCCAAAGC	14	MVB12A	2
GGATGGAGAGAATCACTCAG	OR4F16	HGLibA_41279	GGATGGAGAGAATCACTCAG	14	OR4F16	2
GAGCATTGCGATCATCGCCA	SLC17A2	HGLibA_51750	GAGCATTGCGATCATCGCCA	14	SLC17A2	2
TTGTGCTGATATAAACAGCA	SLC35E2	HGLibA_52277	TTGTGCTGATATAAACAGCA	14	SLC35E2	2
CGTCTGTGTCGTTATTGCCC	TSPAN18	HGLibA_59203	CGTCTGTGTCGTTATTGCCC	14	TSPAN18	2
CACCAGCCACTTTACTGTGA	TVP23C	HGLibA_59650	CACCAGCCACTTTACTGTGA	14	TVP23C	2
GGCTTGGTCCTAACAACTCC	USH2A	HGLibA_60468	GGCTTGGTCCTAACAACTCC	14	USH2A	2
ATGAGCGAGACCGCCAGCCT	USP30	HGLibA_60617	ATGAGCGAGACCGCCAGCCT	14	USP30	2
TTTCTGATGGCGGATGAGAC	ZFP41	HGLibA_62504	TTTCTGATGGCGGATGAGAC	14	ZFP41	2
CTTCTCACGTGTGTATGATG	AACS	HGLibA_00026	CTTCTCACGTGTGTATGATG	14	AACS	1
GAACTCCTGTCGCTCGTACT	ADAP1	HGLibA_00863	GAACTCCTGTCGCTCGTACT	14	ADAP1	1
TTCACAAACGCCATCCGTCT	ADRA1A	HGLibA_01037	TTCACAAACGCCATCCGTCT	14	ADRA1A	1
CCCAAACAGTGGAATGGCCT	AKR7A3	HGLibA_01501	CCCAAACAGTGGAATGGCCT	14	AKR7A3	1
CAGCTTCTCACGAACCTCTC	ANHX	HGLibA_01932	CAGCTTCTCACGAACCTCTC	14	ANHX	1
TTGCGCGCAGCAAGGTGAAG	ANKS1B	HGLibA_02153	TTGCGCGCAGCAAGGTGAAG	14	ANKS1B	1
AGATGTTGTCATCCCGCTTG	AP3S2	HGLibA_02337	AGATGTTGTCATCCCGCTTG	14	AP3S2	1
GTATGCCCACATACAGTACG	ARRDC5	HGLibA_03126	GTATGCCCACATACAGTACG	14	ARRDC5	1
ATGACCACAAACTCAGCAAT	ATP12A	HGLibA_03564	ATGACCACAAACTCAGCAAT	14	ATP12A	1
GCCCACGCGTTGGCAGCGGT	ATP6AP1L	HGLibA_03696	GCCCACGCGTTGGCAGCGGT	14	ATP6AP1L	1
AAGCTGAACTGACTCGTCCG	C19orf47	HGLibA_05670	AAGCTGAACTGACTCGTCCG	14	C19orf47	1
CTCCTTATCCAGCTCCGTGC	CCDC157	HGLibA_07662	CTCCTTATCCAGCTCCGTGC	14	CCDC157	1
CTGGTAGATCGCGTCTTGCC	CD209	HGLibA_08295	CTGGTAGATCGCGTCTTGCC	14	CD209	1
TACATACCTGGAGCCTTAGC	CD2AP	HGLibA_08327	TACATACCTGGAGCCTTAGC	14	CD2AP	1
ACCAGTACCGCATCTTGCGC	COL14A1	HGLibA_10511	ACCAGTACCGCATCTTGCGC	14	COL14A1	1
TGGTGCAGGTTCGCCCGCCT	CTSL2	HGLibA_11721	TGGTGCAGGTTCGCCCGCCT	14	CTSL2	1
GAGTGCTGTCCCAATTGCCG	DNAJA1	HGLibA_13511	GAGTGCTGTCCCAATTGCCG	14	DNAJA1	1
AAAGAGACCTCCCCCATAGC	DNAJC6	HGLibA_13634	AAAGAGACCTCCCCCATAGC	14	DNAJC6	1
AGGTGCACCGATTATACCCG	EEFSEC	HGLibA_14513	AGGTGCACCGATTATACCCG	14	EEFSEC	1
CCAGAATAAGTGTTCCATCG	ELOVL3	HGLibA_14962	CCAGAATAAGTGTTCCATCG	14	ELOVL3	1
CTCTTTGAATTCTATCGCAG	FAM126A	HGLibA_16080	CTCTTTGAATTCTATCGCAG	14	FAM126A	1
ACACCACGATGTTCTCGCGC	FAM78B	HGLibA_16730	ACACCACGATGTTCTCGCGC	14	FAM78B	1
GTCAAGTTGCACTCCTCTTC	FRG2C	HGLibA_18001	GTCAAGTTGCACTCCTCTTC	14	FRG2C	1
TGCGGAGGTAACGCTCCCGA	GEMIN7	HGLibA_18922	TGCGGAGGTAACGCTCCCGA	14	GEMIN7	1
AACTATATTGAAGAACGTTC	GNG11	HGLibA_19510	AACTATATTGAAGAACGTTC	14	GNG11	1
AGTCCGAGTACTGCGCGCAG	HHIPL1	HGLibA_21265	AGTCCGAGTACTGCGCGCAG	14	HHIPL1	1
GTTTTTAGGACATGTATGTC	hsa-mir-1302-7	HGLibA_22768	GTTTTTAGGACATGTATGTC	14	hsa-mir-1302-7	1
GTTAATGCTAATCGTGATAG	hsa-mir-155	HGLibA_22984	GTTAATGCTAATCGTGATAG	14	hsa-mir-155	1
AGGCAAATGTGATGTCACTG	hsa-mir-216b	HGLibA_23316	AGGCAAATGTGATGTCACTG	14	hsa-mir-216b	1
ATGTATGTCTGTTACACATA	hsa-mir-3688-1	HGLibA_24360	ATGTATGTCTGTTACACATA	14	hsa-mir-3688-1	1
ACACTGGACTTGGTGTCAGA	hsa-mir-378h	HGLibA_24511	ACACTGGACTTGGTGTCAGA	14	hsa-mir-378h	1
TCCAGACTGTGGCTGACCAG	hsa-mir-4494	HGLibA_25450	TCCAGACTGTGGCTGACCAG	14	hsa-mir-4494	1
CAGATGCCACTGCACGTCCA	hsa-mir-4663	HGLibA_25820	CAGATGCCACTGCACGTCCA	14	hsa-mir-4663	1
GATTAGCCTATATTGTTGTC	hsa-mir-4774	HGLibA_26254	GATTAGCCTATATTGTTGTC	14	hsa-mir-4774	1
GAGAAAGACAGAACAATTAG	hsa-mir-6739	HGLibA_28165	GAGAAAGACAGAACAATTAG	14	hsa-mir-6739	1
TGCTCACACAAAGCCTGCTT	hsa-mir-6839	HGLibA_28587	TGCTCACACAAAGCCTGCTT	14	hsa-mir-6839	1
GCTGTGGGAAGTGCCCTACT	hsa-mir-890	HGLibA_29292	GCTGTGGGAAGTGCCCTACT	14	hsa-mir-890	1
CTCACACCTTGACTGCCAAG	HSP90AB1	HGLibA_29540	CTCACACCTTGACTGCCAAG	14	HSP90AB1	1
CACGCTGGGACTTAATGAGC	INPPL1	HGLibA_30652	CACGCTGGGACTTAATGAGC	14	INPPL1	1
CCCTATCTGTACAGTTGTTG	KIAA0232	HGLibA_31900	CCCTATCTGTACAGTTGTTG	14	KIAA0232	1
CTCCTTCAGATACGCACAAG	KLHDC3	HGLibA_32388	CTCCTTCAGATACGCACAAG	14	KLHDC3	1
TGCCTCCCCCGTATACACGT	KLHL38	HGLibA_32489	TGCCTCCCCCGTATACACGT	14	KLHL38	1
CATTGATCTCACCACCCACC	KRT17	HGLibA_32723	CATTGATCTCACCACCCACC	14	KRT17	1
AGATGTGCGACTGCAGCAAC	KRT84	HGLibA_32856	AGATGTGCGACTGCAGCAAC	14	KRT84	1
TAGTTTCGGGTAAATGAGTT	L3MBTL3	HGLibA_33191	TAGTTTCGGGTAAATGAGTT	14	L3MBTL3	1
GTACCTGCCGCGTCCGATTC	MALSU1	HGLibA_35318	GTACCTGCCGCGTCCGATTC	14	MALSU1	1
TGAGCAGCACCAGTTAAACA	MCU	HGLibA_35950	TGAGCAGCACCAGTTAAACA	14	MCU	1
GAGGAGCCCGACGTGTCCGA	MEX3B	HGLibA_36318	GAGGAGCCCGACGTGTCCGA	14	MEX3B	1
TGCCTTTCCCGTTCTGTACC	MFSD3	HGLibA_36387	TGCCTTTCCCGTTCTGTACC	14	MFSD3	1
AGATGCAGACAAACCGCGTG	MPPED2	HGLibA_37061	AGATGCAGACAAACCGCGTG	14	MPPED2	1
ATTTCAGACATGAACCTCCA	MRPS10	HGLibA_37318	ATTTCAGACATGAACCTCCA	14	MRPS10	1
CCTCTTACCTTATCATACAA	NOMO1	HGLibA_39576	CCTCTTACCTTATCATACAA	14	NOMO1	1
CAAACAGTCTAAGGCGACGA	NonTargetingControlGuideForHuman_0219	HGLibA_64602	CAAACAGTCTAAGGCGACGA	14	NonTargetingControlGuideForHuman_0219	1
CCTCGTCCTCGCGCTCGCTC	NUDT10	HGLibA_40222	CCTCGTCCTCGCGCTCGCTC	14	NUDT10	1
CTTTATCTATATCATCCGTA	NUP85	HGLibA_40358	CTTTATCTATATCATCCGTA	14	NUP85	1
TGAGCACGGGATTGCCGTGC	OBSL1	HGLibA_40522	TGAGCACGGGATTGCCGTGC	14	OBSL1	1
ATTTGATTTAGGCCGGAAGT	OR10A2	HGLibA_40748	ATTTGATTTAGGCCGGAAGT	14	OR10A2	1
CTGCATCCGACAAAGAACCC	OTOA	HGLibA_42011	CTGCATCCGACAAAGAACCC	14	OTOA	1
AGTAGCGCACAAGAACCGCC	PCDH1	HGLibA_42672	AGTAGCGCACAAGAACCGCC	14	PCDH1	1
TCGTCTCAACCAAACGACTA	PDILT	HGLibA_43179	TCGTCTCAACCAAACGACTA	14	PDILT	1
TCGATATGAAGACTTCGTAG	PDXDC1	HGLibA_43246	TCGATATGAAGACTTCGTAG	14	PDXDC1	1
TCACCCCGTTGGCGTGCGAC	PELI3	HGLibA_43326	TCACCCCGTTGGCGTGCGAC	14	PELI3	1
AGGTATCCCTGTTGATCCGC	PHB2	HGLibA_43603	AGGTATCCCTGTTGATCCGC	14	PHB2	1
TTCAGACCGACATGCTGTAC	PHC3	HGLibA_43611	TTCAGACCGACATGCTGTAC	14	PHC3	1
GAAGATTTGCTGAACCCTAT	PIK3CA	HGLibA_43921	GAAGATTTGCTGAACCCTAT	14	PIK3CA	1
GACAATTTGCAGGCTACTTT	PLCZ1	HGLibA_44319	GACAATTTGCAGGCTACTTT	14	PLCZ1	1
TCCCGTACACCCGACAGTCC	PNKD	HGLibA_44635	TCCCGTACACCCGACAGTCC	14	PNKD	1
CCGAGACCTAGTCTTGCTGA	PRR5L	HGLibA_46136	CCGAGACCTAGTCTTGCTGA	14	PRR5L	1
GACGCAGGCGCAGATTGCGT	PRSS53	HGLibA_46244	GACGCAGGCGCAGATTGCGT	14	PRSS53	1
TCGACTTTGATGGCACTCCT	PSMA7	HGLibA_46375	TCGACTTTGATGGCACTCCT	14	PSMA7	1
TCTGACCCTGTTAAGACTTT	PTPRQ	HGLibA_46817	TCTGACCCTGTTAAGACTTT	14	PTPRQ	1
CATGTCGCGCAGCACGTTAG	PYCARD	HGLibA_46957	CATGTCGCGCAGCACGTTAG	14	PYCARD	1
TGATGACGGCCGCGGCTACG	RBMXL3	HGLibA_47895	TGATGACGGCCGCGGCTACG	14	RBMXL3	1
ATCTAGCTGACCATCACTGT	S100A11	HGLibA_49823	ATCTAGCTGACCATCACTGT	14	S100A11	1
TCCTCCGATCTGCGACTGCC	SAMD11	HGLibA_49954	TCCTCCGATCTGCGACTGCC	14	SAMD11	1
ATCCACCCCAGATCTCGACA	SARS2	HGLibA_50039	ATCCACCCCAGATCTCGACA	14	SARS2	1
TTTCTACAAGAGGCGACCAT	SLC16A1	HGLibA_51705	TTTCTACAAGAGGCGACCAT	14	SLC16A1	1
TCTGAAGTAGAGAGCGATGC	SLC39A7	HGLibA_52409	TCTGAAGTAGAGAGCGATGC	14	SLC39A7	1
CCCGTCCGTCATGGTGGTGT	SMIM5	HGLibA_53048	CCCGTCCGTCATGGTGGTGT	14	SMIM5	1
GTTGTCTGTATTTAGGGTGC	SMR3A	HGLibA_53111	GTTGTCTGTATTTAGGGTGC	14	SMR3A	1
TGTGAGAAAGATGTGCTGCA	SPAG9	HGLibA_53661	TGTGAGAAAGATGTGCTGCA	14	SPAG9	1
GTTCTGGGCTGTCATGCGTG	STOML1	HGLibA_54823	GTTCTGGGCTGTCATGCGTG	14	STOML1	1
CGTATTCAGCCGCCGCCTTC	TMEM114	HGLibA_57167	CGTATTCAGCCGCCGCCTTC	14	TMEM114	1
TATGCACAGCAGCGTCTTCG	TMEM55A	HGLibA_57732	TATGCACAGCAGCGTCTTCG	14	TMEM55A	1
CTGCTGACACAATAGCGCCC	TMUB2	HGLibA_57973	CTGCTGACACAATAGCGCCC	14	TMUB2	1
AACACACGTACCTGGTATGA	TPP1	HGLibA_58446	AACACACGTACCTGGTATGA	14	TPP1	1
CAATAAACCGACGTTTAGCC	U2AF1	HGLibA_59780	CAATAAACCGACGTTTAGCC	14	U2AF1	1
GCTGCGGCTCTTGAGCTTGT	UBASH3A	HGLibA_59846	GCTGCGGCTCTTGAGCTTGT	14	UBASH3A	1
ATGTCAGAAGCAGAATCGTT	UBL3	HGLibA_59990	ATGTCAGAAGCAGAATCGTT	14	UBL3	1
CGGGCTGACCGATCTTGACG	ULK1	HGLibA_60256	CGGGCTGACCGATCTTGACG	14	ULK1	1
TGGCCCTTTACAGAATATAC	WDR92	HGLibA_61508	TGGCCCTTTACAGAATATAC	14	WDR92	1
TGTGCTTACCTTTCCCGAGC	XAF1	HGLibA_61751	TGTGCTTACCTTTCCCGAGC	14	XAF1	1
ATTGTCTCAGTATGACTTCT	ZNF730	HGLibA_63932	ATTGTCTCAGTATGACTTCT	14	ZNF730	1
ACGCCGACAGATCCCAGTGC	ZNF777	HGLibA_64014	ACGCCGACAGATCCCAGTGC	14	ZNF777	1
AACACCTTCGAAATGAGCTC	CCDC13	HGLibA_07590	AACACCTTCGAAATGAGCTC	14
TACCCTGTGCCGCTGTGCTC	FBXL20	HGLibA_17001	TACCCTGTGCCGCTGTGCTC	14
ACCTGTACCTGCTCCGCTAC	GPR148	HGLibA_19922	ACCTGTACCTGCTCCGCTAC	14
TTGCACTTTAGCAATGGTGA	hsa-mir-367	HGLibA_24283	TTGCACTTTAGCAATGGTGA	14
TCCATGCTCACCTGGTGAAG	IL9R_X	HGLibA_30491	TCCATGCTCACCTGGTGAAG	14
AGACTAACTCGTTCAGCTTA	LOC100144595	HGLibA_34101	AGACTAACTCGTTCAGCTTA	14
CCCAACAGGTGGTTATCACC	RPL26L1	HGLibA_49203	CCCAACAGGTGGTTATCACC	14
TTGTGATGAGTTCCCGATCG	SP140L	HGLibA_53581	TTGTGATGAGTTCCCGATCG	14
GGCACGAACAAGGACGTGTT	SUPV3L1	HGLibA_55116	GGCACGAACAAGGACGTGTT	14
TGCTCGTGGTGATCTCATCG	TRIM32	HGLibA_58749	TGCTCGTGGTGATCTCATCG	14
ACGGCACCGCTGTTCACCCC	TTC5	HGLibA_59434	ACGGCACCGCTGTTCACCCC	14
ACGTACTCCACATCGCCGAA	DBP	HGLibA_12400	ACGTACTCCACATCGCCGAA	13	DBP	3
GGTCGGACGCGTCTTCTTTC	ABT1	HGLibA_00333	GGTCGGACGCGTCTTCTTTC	13	ABT1	2
TTACTGAAGACGAATAGCTA	AGTR2	HGLibA_01265	TTACTGAAGACGAATAGCTA	13	AGTR2	2
AAGTTCCCAAGACAGCGCTC	C10orf129	HGLibA_05053	AAGTTCCCAAGACAGCGCTC	13	C10orf129	2
AATGAACTCCCTGCAGGCAA	hsa-mir-4742	HGLibA_26118	AATGAACTCCCTGCAGGCAA	13	hsa-mir-4742	2
GCACCTCAAATTTGCCATGC	JTB	HGLibA_31289	GCACCTCAAATTTGCCATGC	13	JTB	2
CAACGGCCACTCTAAGCAGC	NRIP2	HGLibA_39983	CAACGGCCACTCTAAGCAGC	13	NRIP2	2
AAATCAACTTGCCCGAGTCG	OTX2	HGLibA_42073	AAATCAACTTGCCCGAGTCG	13	OTX2	2
TGCCATCTGCCCCCATCGAC	SCNM1	HGLibA_50299	TGCCATCTGCCCCCATCGAC	13	SCNM1	2
AGCAGCATCTCTCTCTTTGC	TMF1	HGLibA_57868	AGCAGCATCTCTCTCTTTGC	13	TMF1	2
TGTGTGCGGCTGCGCACCTT	VPS51	HGLibA_61091	TGTGTGCGGCTGCGCACCTT	13	VPS51	2
GCCACATTCCAGGAGAACGA	ANKRD18A	HGLibA_02018	GCCACATTCCAGGAGAACGA	13	ANKRD18A	1
TGCCAGTCCAGTTAACATCA	ANKRD40	HGLibA_02097	TGCCAGTCCAGTTAACATCA	13	ANKRD40	1
CTCGGCCAATGCCAATGATG	ANKRD54	HGLibA_02122	CTCGGCCAATGCCAATGATG	13	ANKRD54	1
CGACTGTGTACGCCGCCAGC	C15orf39	HGLibA_05392	CGACTGTGTACGCCGCCAGC	13	C15orf39	1
CCCCGGCGGCCTCACGCACT	CACNG8	HGLibA_06951	CCCCGGCGGCCTCACGCACT	13	CACNG8	1
CCATCATGCCGAGGGAGCGC	CCNE1	HGLibA_08084	CCATCATGCCGAGGGAGCGC	13	CCNE1	1
TCATCCTGCTGACGATTGAC	CCR1	HGLibA_08144	TCATCCTGCTGACGATTGAC	13	CCR1	1
TCCGTGAACTCGCCACCGCG	CHST2	HGLibA_09630	TCCGTGAACTCGCCACCGCG	13	CHST2	1
CATGCCCACAGTCTTGATGA	CKMT1A	HGLibA_09779	CATGCCCACAGTCTTGATGA	13	CKMT1A	1
TTTGCCCTGCCACCATCAAC	CLMP	HGLibA_10073	TTTGCCCTGCCACCATCAAC	13	CLMP	1
ATGCTGCGATTAGCTATTGA	CLVS2	HGLibA_10170	ATGCTGCGATTAGCTATTGA	13	CLVS2	1
GCTTCTTCACCATCAGCACC	CST9L	HGLibA_11475	GCTTCTTCACCATCAGCACC	13	CST9L	1
AGCGGACTGCAGCGAACCGC	CTIF	HGLibA_11631	AGCGGACTGCAGCGAACCGC	13	CTIF	1
TAATCTAAATGACCCGTTCC	CTTNBP2	HGLibA_11744	TAATCTAAATGACCCGTTCC	13	CTTNBP2	1
ACGCCGATTCCATGAGCTTG	CXXC1	HGLibA_11964	ACGCCGATTCCATGAGCTTG	13	CXXC1	1
GCATTTCATTCAAAATTAAC	DDX60	HGLibA_12763	GCATTTCATTCAAAATTAAC	13	DDX60	1
CTAAGCAAAGCACCCGAACT	ELOVL6	HGLibA_14972	CTAAGCAAAGCACCCGAACT	13	ELOVL6	1
CCAGTTCCCTGAGATTAATA	ERBB2IP	HGLibA_15416	CCAGTTCCCTGAGATTAATA	13	ERBB2IP	1
AGTTCGTGCGCAATGTGCCC	ERCC1	HGLibA_15430	AGTTCGTGCGCAATGTGCCC	13	ERCC1	1
TACACCGCCCAGCCCACTCA	EWSR1	HGLibA_15713	TACACCGCCCAGCCCACTCA	13	EWSR1	1
GCGAGTTCGACAGCTCACTG	EXOC8	HGLibA_15762	GCGAGTTCGACAGCTCACTG	13	EXOC8	1
TGGCCAAACCGTGCGCGTGC	FAM120AOS	HGLibA_16056	TGGCCAAACCGTGCGCGTGC	13	FAM120AOS	1
TTCAGTTCCTGCCCCGACTC	FAM189B	HGLibA_16357	TTCAGTTCCTGCCCCGACTC	13	FAM189B	1
TCCCACTGCAGGAGGCACGA	FBXL14	HGLibA_16980	TCCCACTGCAGGAGGCACGA	13	FBXL14	1
GAGATCGCAACGTCAACTTG	FBXW9	HGLibA_17159	GAGATCGCAACGTCAACTTG	13	FBXW9	1
CTCTATGAGTGTACCACCAT	FGF10	HGLibA_17364	CTCTATGAGTGTACCACCAT	13	FGF10	1
TGGCAGAACGGAGGTGCGCG	FOXH1	HGLibA_17872	TGGCAGAACGGAGGTGCGCG	13	FOXH1	1
CGGTACTCACCATGCGGATC	GCHFR	HGLibA_18785	CGGTACTCACCATGCGGATC	13	GCHFR	1
ACTTGAGAACGTCCTTGTGC	GCLC	HGLibA_18794	ACTTGAGAACGTCCTTGTGC	13	GCLC	1
GGGCTCATGGCTGTCGACTG	HN1L	HGLibA_21771	GGGCTCATGGCTGTCGACTG	13	HN1L	1
TGTACAGTTATCTCCTGTAC	hsa-let-7g	HGLibA_22187	TGTACAGTTATCTCCTGTAC	13	hsa-let-7g	1
GTGTGCAAAGGGTGGCAGCA	hsa-mir-1976	HGLibA_23173	GTGTGCAAAGGGTGGCAGCA	13	hsa-mir-1976	1
TGGGATGGTAAACCGCTTCT	hsa-mir-299	HGLibA_23461	TGGGATGGTAAACCGCTTCT	13	hsa-mir-299	1
TGGAAGCTGGTTTCACATGG	hsa-mir-29b-2	HGLibA_23472	TGGAAGCTGGTTTCACATGG	13	hsa-mir-29b-2	1
GCTGATGGTTGTATCTATGA	hsa-mir-3935	HGLibA_24654	GCTGATGGTTGTATCTATGA	13	hsa-mir-3935	1
TTAGCAAACACTAGCGTGCC	hsa-mir-4317	HGLibA_25043	TTAGCAAACACTAGCGTGCC	13	hsa-mir-4317	1
TTATGCACTGTGTCTCGTCT	hsa-mir-5047	HGLibA_26528	TTATGCACTGTGTCTCGTCT	13	hsa-mir-5047	1
AGGAGTGGCACCCAGGACAT	hsa-mir-6124	HGLibA_27699	AGGAGTGGCACCCAGGACAT	13	hsa-mir-6124	1
TTTTTTCATTTTGTAGGCTG	hsa-mir-664a	HGLibA_28046	TTTTTTCATTTTGTAGGCTG	13	hsa-mir-664a	1
TTTCTGGCGGGAAGCTGGGT	hsa-mir-6737	HGLibA_28154	TTTCTGGCGGGAAGCTGGGT	13	hsa-mir-6737	1
CACCTTGCATCTGCATCCCC	hsa-mir-6841	HGLibA_28593	CACCTTGCATCTGCATCCCC	13	hsa-mir-6841	1
TATCTCTTCTCAGGGAAAGC	hsa-mir-6891	HGLibA_28804	TATCTCTTCTCAGGGAAAGC	13	hsa-mir-6891	1
GTTCACGCAGCCGCGACACA	IRF2BP1	HGLibA_30866	GTTCACGCAGCCGCGACACA	13	IRF2BP1	1
TTGATGACAAGATGTCCCTC	JAK1	HGLibA_31201	TTGATGACAAGATGTCCCTC	13	JAK1	1
AGCCCACATCGATGTCGATC	KCNJ12	HGLibA_31544	AGCCCACATCGATGTCGATC	13	KCNJ12	1
AAGCTGCATGCCTGTATCTT	KNTC1	HGLibA_32638	AAGCTGCATGCCTGTATCTT	13	KNTC1	1
AGTGTACTCCGTTGCCAACT	KRT36	HGLibA_32780	AGTGTACTCCGTTGCCAACT	13	KRT36	1
CAAAGCTGCGTCTTGTCTCG	LDLRAD2	HGLibA_33533	CAAAGCTGCGTCTTGTCTCG	13	LDLRAD2	1
ATGCAATCGAACTCCCGCAG	LGI3	HGLibA_33686	ATGCAATCGAACTCCCGCAG	13	LGI3	1
ATTCGCTCCAAGTTCCGATC	MAMSTR	HGLibA_35343	ATTCGCTCCAAGTTCCGATC	13	MAMSTR	1
CCGAATGCCTGACTGCTCTG	MDC1	HGLibA_35955	CCGAATGCCTGACTGCTCTG	13	MDC1	1
AGTCTGCTGCGGCCAAGTTG	MRGPRX1	HGLibA_37135	AGTCTGCTGCGGCCAAGTTG	13	MRGPRX1	1
TCGTCTAAAGTTCAATCTTC	MRPL50	HGLibA_37297	TCGTCTAAAGTTCAATCTTC	13	MRPL50	1
GGATACCTTCTTCTACTCAT	MTA3	HGLibA_37605	GGATACCTTCTTCTACTCAT	13	MTA3	1
CACGTTCTGCTAGTTCTGTC	NCAPD2	HGLibA_38550	CACGTTCTGCTAGTTCTGTC	13	NCAPD2	1
CGTGACCACCATCAGTGACC	NOL12	HGLibA_39551	CGTGACCACCATCAGTGACC	13	NOL12	1
ATTAGCACGGCGACCTTCTA	NonTargetingControlGuideForHuman_0136	HGLibA_64519	ATTAGCACGGCGACCTTCTA	13	NonTargetingControlGuideForHuman_0136	1
GTCCCAACTCCTGCGCACGA	NOXO1	HGLibA_39672	GTCCCAACTCCTGCGCACGA	13	NOXO1	1
CTGGCTCGAGATTTAGCGCA	NSD1	HGLibA_40032	CTGGCTCGAGATTTAGCGCA	13	NSD1	1
GGAGATGAAGACCCTGTTCC	OBP2B	HGLibA_40517	GGAGATGAAGACCCTGTTCC	13	OBP2B	1
GTGTTGTTCATGCGCTCCGA	OPLAH	HGLibA_40707	GTGTTGTTCATGCGCTCCGA	13	OPLAH	1
ATCTCATCATTCTCCTATGC	OR2M7	HGLibA_41134	ATCTCATCATTCTCCTATGC	13	OR2M7	1
TTTGTCCTCTGACTAGTAGA	OR6C1	HGLibA_41670	TTTGTCCTCTGACTAGTAGA	13	OR6C1	1
GTCCAGCTGTGAACGCGTGA	OTX1	HGLibA_42072	GTCCAGCTGTGAACGCGTGA	13	OTX1	1
CTGCAACACCTGCGACCCCA	PCNXL3	HGLibA_42937	CTGCAACACCTGCGACCCCA	13	PCNXL3	1
CCGCAAGGTCATGCGGACCC	PLCD1	HGLibA_44277	CCGCAAGGTCATGCGGACCC	13	PLCD1	1
TCTCCAATAAGAACTCGTCC	PLEKHF2	HGLibA_44386	TCTCCAATAAGAACTCGTCC	13	PLEKHF2	1
GCCCGACGACGTCTACTCGC	POU3F3	HGLibA_45058	GCCCGACGACGTCTACTCGC	13	POU3F3	1
TGCAGCAGTACCGAGTGCCC	PPDPF	HGLibA_45153	TGCAGCAGTACCGAGTGCCC	13	PPDPF	1
GGTATCCAGCCTTCATTATC	PPP1R12A	HGLibA_45307	GGTATCCAGCCTTCATTATC	13	PPP1R12A	1
CCAATGGAGCATCCTACGCA	PSMD8	HGLibA_46473	CCAATGGAGCATCCTACGCA	13	PSMD8	1
CAAGTAGCTACATTCATCAG	RAPGEF5	HGLibA_47546	CAAGTAGCTACATTCATCAG	13	RAPGEF5	1
CCACGGCCATAGGGTAGCGT	RPL36	HGLibA_49240	CCACGGCCATAGGGTAGCGT	13	RPL36	1
CATTGTGATCTTGATCCAAT	RSF1	HGLibA_49599	CATTGTGATCTTGATCCAAT	13	RSF1	1
GACTCAATGCTATTGATTTC	RUNDC3B	HGLibA_49741	GACTCAATGCTATTGATTTC	13	RUNDC3B	1
GCCACTCCTGCCCCATTTAT	SAA2	HGLibA_49899	GCCACTCCTGCCCCATTTAT	13	SAA2	1
TCCGCTCCGCGTCACACTTC	SARS	HGLibA_50036	TCCGCTCCGCGTCACACTTC	13	SARS	1
CTTGTTCCGAAACTGCACAC	SCTR	HGLibA_50355	CTTGTTCCGAAACTGCACAC	13	SCTR	1
GAGAGTCTCTCCACCGCTTC	SERPINA3	HGLibA_50805	GAGAGTCTCTCCACCGCTTC	13	SERPINA3	1
TGAGTGCGACCGTTTCCCCC	SFRP2	HGLibA_51026	TGAGTGCGACCGTTTCCCCC	13	SFRP2	1
GTGTGCTACTCCGCCAGCAT	SLC13A2	HGLibA_51676	GTGTGCTACTCCGCCAGCAT	13	SLC13A2	1
AGCCTTCGTGCGTCTGAATG	SLC4A3	HGLibA_52505	AGCCTTCGTGCGTCTGAATG	13	SLC4A3	1
AAAAGTTCGCAACCGCCAAG	SMYD3	HGLibA_53145	AAAAGTTCGCAACCGCCAAG	13	SMYD3	1
CCGCTCACCTTTCCGCTCCA	SRPK1	HGLibA_54306	CCGCTCACCTTTCCGCTCCA	13	SRPK1	1
GTCGCTGTTCCGCTTTCCCA	THAP10	HGLibA_56577	GTCGCTGTTCCGCTTTCCCA	13	THAP10	1
GGAACACTTACCTTCGCGGC	TMA7	HGLibA_57023	GGAACACTTACCTTCGCGGC	13	TMA7	1
GTGGCTGACCGTCGTCCTCC	TNFRSF18	HGLibA_58054	GTGGCTGACCGTCGTCCTCC	13	TNFRSF18	1
CAAGTATTCTGAAGCTTTGA	TPM3	HGLibA_58434	CAAGTATTCTGAAGCTTTGA	13	TPM3	1
CCTGCTCATCGAGACCTACG	TPRG1L	HGLibA_58472	CCTGCTCATCGAGACCTACG	13	TPRG1L	1
CCTTCTACACGTGACCCACC	TREML2	HGLibA_58650	CCTTCTACACGTGACCCACC	13	TREML2	1
CCTTGACAGAATGTCCAGCA	TTC37	HGLibA_59413	CCTTGACAGAATGTCCAGCA	13	TTC37	1
AAGCGTACCATCTACACCGC	UCKL1	HGLibA_60104	AAGCGTACCATCTACACCGC	13	UCKL1	1
ACAGCGATGGGGCGTCCGAC	UNC5CL	HGLibA_60310	ACAGCGATGGGGCGTCCGAC	13	UNC5CL	1
GTCCAGGATCAGCCGCCAAT	UQCR11	HGLibA_60395	GTCCAGGATCAGCCGCCAAT	13	UQCR11	1
ACTCACATGGTACATAGACG	USB1	HGLibA_60450	ACTCACATGGTACATAGACG	13	USB1	1
ATATCTTCCGACGTAGCTTT	USP54	HGLibA_60688	ATATCTTCCGACGTAGCTTT	13	USP54	1
AATCGTTATCCCTACCACGA	VIT	HGLibA_60962	AATCGTTATCCCTACCACGA	13	VIT	1
CAAGCGCTTGACATCACTGA	ZEB2	HGLibA_62425	CAAGCGCTTGACATCACTGA	13	ZEB2	1
AGAGGAGAGTTCCCGAGATC	ZSCAN10	HGLibA_64275	AGAGGAGAGTTCCCGAGATC	13	ZSCAN10	1
GTTGGAGCTGCCACGGTCTA	ZSCAN5A	HGLibA_64316	GTTGGAGCTGCCACGGTCTA	13	ZSCAN5A	1
GCGGCCCATCGTGCCCGCGC	ACTR8	HGLibA_00673	GCGGCCCATCGTGCCCGCGC	13
CTGCATACCTTTAGAGACAT	AKR1C3	HGLibA_01488	CTGCATACCTTTAGAGACAT	13
GTGCTAAAATTGCAGACACT	hsa-mir-1248	HGLibA_22446	GTGCTAAAATTGCAGACACT	13
TGTATTCTCCTTTGCCTGCA	hsa-mir-4742	HGLibA_26119	TGTATTCTCCTTTGCCTGCA	13
ACATCATCGTGACCCGCTCT	SOCS6	HGLibA_53425	ACATCATCGTGACCCGCTCT	13
TATCAGTGCTCTCATCGAGT	FAM200A	HGLibA_16411	TATCAGTGCTCTCATCGAGT	12	FAM200A	2
AACATACCTGCAGTATCTTC	FAM9B	HGLibA_16821	AACATACCTGCAGTATCTTC	12	FAM9B	2
ACACGCGCTACATGCGGACT	HOXC9	HGLibA_21979	ACACGCGCTACATGCGGACT	12	HOXC9	2
CAACACAGACGAGCCGGTCG	hsa-mir-1307	HGLibA_22797	CAACACAGACGAGCCGGTCG	12	hsa-mir-1307	2
TGGTGTGCCACAGCGCAGAT	LY6G6C	HGLibA_34953	TGGTGTGCCACAGCGCAGAT	12	LY6G6C	2
CCCAGTGATGCTCAACATGT	OR6C74	HGLibA_41695	CCCAGTGATGCTCAACATGT	12	OR6C74	2
TCTCAGGTATGTCCGCATGC	PRPF38A	HGLibA_46010	TCTCAGGTATGTCCGCATGC	12	PRPF38A	2
GTATATCTTCTTTAAACTCC	WBP5	HGLibA_61274	GTATATCTTCTTTAAACTCC	12	WBP5	2
ACCTACCATCATGTGTAACA	42705	HGLibA_12770	ACCTACCATCATGTGTAACA	12	42705	1
GAAATAGATACCTTTCCCCG	ABCA5	HGLibA_00116	GAAATAGATACCTTTCCCCG	12	ABCA5	1
AAATGCCGACAACGAAGGCG	ACAP1	HGLibA_00383	AAATGCCGACAACGAAGGCG	12	ACAP1	1
CATGGCTAGCACCGCGTTGC	ACTL10	HGLibA_00618	CATGGCTAGCACCGCGTTGC	12	ACTL10	1
GTGTTGGAAGCCCGCCCATG	ADCYAP1R1	HGLibA_00938	GTGTTGGAAGCCCGCCCATG	12	ADCYAP1R1	1
AACGGACACTCGAAGTCCAC	ADRA2B	HGLibA_01050	AACGGACACTCGAAGTCCAC	12	ADRA2B	1
ACTGATCCCAATGAAAGCCA	AGPAT9	HGLibA_01235	ACTGATCCCAATGAAAGCCA	12	AGPAT9	1
ACACCTTTACTTCATCAATC	AHSG	HGLibA_01320	ACACCTTTACTTCATCAATC	12	AHSG	1
AGCCCTGGAACCGTTCAGAG	ALKBH6	HGLibA_01662	AGCCCTGGAACCGTTCAGAG	12	ALKBH6	1
GCCTGCGACTGAAAAAGCGC	ARHGAP36	HGLibA_02768	GCCTGCGACTGAAAAAGCGC	12	ARHGAP36	1
CAGACTGCCCCATGGTTATT	ARIH2	HGLibA_02914	CAGACTGCCCCATGGTTATT	12	ARIH2	1
TCTGCAGCAGCACGAGTCTC	BATF2	HGLibA_04176	TCTGCAGCAGCACGAGTCTC	12	BATF2	1
GTGCTCAACAATGTCGATTC	BCHE	HGLibA_04274	GTGCTCAACAATGTCGATTC	12	BCHE	1
GGCGTATGTACCCTATTACT	C14orf28	HGLibA_05359	GGCGTATGTACCCTATTACT	12	C14orf28	1
TACTAATCTACCATCCGAAG	C17orf75	HGLibA_05573	TACTAATCTACCATCCGAAG	12	C17orf75	1
CCACTTGCCTTAGCGTAAGA	C2orf83	HGLibA_06195	CCACTTGCCTTAGCGTAAGA	12	C2orf83	1
CCGCTGAACCGTAGACCACC	C5AR2	HGLibA_06355	CCGCTGAACCGTAGACCACC	12	C5AR2	1
CCTGACACGGTCCTCCGCAT	C5orf30	HGLibA_06374	CCTGACACGGTCCTCCGCAT	12	C5orf30	1
TGCCTCGCGAGTTCCTGCCG	CBFA2T3	HGLibA_07387	TGCCTCGCGAGTTCCTGCCG	12	CBFA2T3	1
GCTAGACGCCTGTTCTCGAA	CCDC51	HGLibA_07796	GCTAGACGCCTGTTCTCGAA	12	CCDC51	1
GATGCTCGGACGCCCCACCA	CD7	HGLibA_08435	GATGCTCGGACGCCCCACCA	12	CD7	1
TGCGGCACACCTCGCGAATC	CHST5	HGLibA_09639	TGCGGCACACCTCGCGAATC	12	CHST5	1
CGTCAGCATTAGCGATGAGA	CIRH1A	HGLibA_09724	CGTCAGCATTAGCGATGAGA	12	CIRH1A	1
TAAGCTTTCAGCAGATGACG	CLEC17A	HGLibA_09940	TAAGCTTTCAGCAGATGACG	12	CLEC17A	1
GTCGCTGGGTATCAAGCACG	CSRP1	HGLibA_11431	GTCGCTGGGTATCAAGCACG	12	CSRP1	1
AGTAATAGATCATCGGTCCC	CWH43	HGLibA_11830	AGTAATAGATCATCGGTCCC	12	CWH43	1
TGCGCCCGAACTCTTCGTTG	CYP1B1	HGLibA_12072	TGCGCCCGAACTCTTCGTTG	12	CYP1B1	1
CTTGAAGTCCACGTAGACAA	DNAJA2	HGLibA_13513	CTTGAAGTCCACGTAGACAA	12	DNAJA2	1
GTCATAGAGAGCGTCGATCT	DNASE1	HGLibA_13652	GTCATAGAGAGCGTCGATCT	12	DNASE1	1
TCCGCATGTATGTTGCTGTC	F13A1	HGLibA_15852	TCCGCATGTATGTTGCTGTC	12	F13A1	1
AGCGAGGTTCACCACTCCTA	FAM117A	HGLibA_16043	AGCGAGGTTCACCACTCCTA	12	FAM117A	1
AGGTCAGTGGGATTCCCGAC	FAM211A	HGLibA_16460	AGGTCAGTGGGATTCCCGAC	12	FAM211A	1
TCTTCCAGGTGGTAGATGCA	FAM60A	HGLibA_16656	TCTTCCAGGTGGTAGATGCA	12	FAM60A	1
GACTCCGATAAGTAATCTTG	FBXO43	HGLibA_17101	GACTCCGATAAGTAATCTTG	12	FBXO43	1
CACACGTCCCCGGGCCGCTC	FDX1L	HGLibA_17261	CACACGTCCCCGGGCCGCTC	12	FDX1L	1
TGTAGTGCACCACACACGTT	FKBP1B	HGLibA_17566	TGTAGTGCACCACACACGTT	12	FKBP1B	1
GAGTCACACGTCATCGACAC	FLT4	HGLibA_17672	GAGTCACACGTCATCGACAC	12	FLT4	1
AGAGAGGCGCATCATCGTCC	FOXO3	HGLibA_17924	AGAGAGGCGCATCATCGTCC	12	FOXO3	1
TTGAATGTCTGAGTACTCCC	GINM1	HGLibA_19099	TTGAATGTCTGAGTACTCCC	12	GINM1	1
CCGTACGCCTGTCAGATCCC	GLIS1	HGLibA_19270	CCGTACGCCTGTCAGATCCC	12	GLIS1	1
GGCATGCTCGATGAAGTCGC	GUK1	HGLibA_20672	GGCATGCTCGATGAAGTCGC	12	GUK1	1
GGTGTAGTACAGGCAGCGAA	HHAT	HGLibA_21252	GGTGTAGTACAGGCAGCGAA	12	HHAT	1
TTTATGTCAGTGCTTGACCC	HNF4G	HGLibA_21784	TTTATGTCAGTGCTTGACCC	12	HNF4G	1
TGCATCCGGGTTGAGGTAGT	hsa-let-7c	HGLibA_22167	TGCATCCGGGTTGAGGTAGT	12	hsa-let-7c	1
TTATCAGGCCATGTCTACAC	hsa-mir-1251	HGLibA_22456	TTATCAGGCCATGTCTACAC	12	hsa-mir-1251	1
AATTTAAACGTCTGTGATCC	hsa-mir-3179-1	HGLibA_23844	AATTTAAACGTCTGTGATCC	12	hsa-mir-3179-1	1
ATTTATGTTGAATCACACAA	hsa-mir-377	HGLibA_24477	ATTTATGTTGAATCACACAA	12	hsa-mir-377	1
GCACTGGACTAGGAGTCAGA	hsa-mir-378i	HGLibA_24517	GCACTGGACTAGGAGTCAGA	12	hsa-mir-378i	1
TGTTTCAGCTCGACAACAAC	hsa-mir-3937	HGLibA_24661	TGTTTCAGCTCGACAACAAC	12	hsa-mir-3937	1
AGAGTCTTGCTCCGTCGCCC	hsa-mir-4472-2	HGLibA_25353	AGAGTCTTGCTCCGTCGCCC	12	hsa-mir-4472-2	1
GATCTGGGCTGAGCCGAGCT	hsa-mir-4507	HGLibA_25510	GATCTGGGCTGAGCCGAGCT	12	hsa-mir-4507	1
GCGCCGCGCTCCCGTCCTGC	hsa-mir-4530	HGLibA_25632	GCGCCGCGCTCCCGTCCTGC	12	hsa-mir-4530	1
AGATAGTGTCTTACTCCCTC	hsa-mir-550a-1	HGLibA_27153	AGATAGTGTCTTACTCCCTC	12	hsa-mir-550a-1	1
CGTTTCCCTCTGGGGGAGCA	hsa-mir-593	HGLibA_27523	CGTTTCCCTCTGGGGGAGCA	12	hsa-mir-593	1
AAAATAAAGGGCATCTTCTG	hsa-mir-6071	HGLibA_27589	AAAATAAAGGGCATCTTCTG	12	hsa-mir-6071	1
TCATTTCAAGGAGGTTGGGA	hsa-mir-6086	HGLibA_27658	TCATTTCAAGGAGGTTGGGA	12	hsa-mir-6086	1
TGCAATGAATGTGGAAATGC	hsa-mir-6130	HGLibA_27725	TGCAATGAATGTGGAAATGC	12	hsa-mir-6130	1
CTTGTTCCCAGGCTACGTGC	hsa-mir-6828	HGLibA_28545	CTTGTTCCCAGGCTACGTGC	12	hsa-mir-6828	1
AGTCCCTCCTCTGCCACCTA	hsa-mir-6865	HGLibA_28698	AGTCCCTCCTCTGCCACCTA	12	hsa-mir-6865	1
CCTCTCCCTCTTTACCCACT	hsa-mir-6867	HGLibA_28706	CCTCTCCCTCTTTACCCACT	12	hsa-mir-6867	1
AAATGTGCTAGTGCCAAAAT	hsa-mir-96	HGLibA_29425	AAATGTGCTAGTGCCAAAAT	12	hsa-mir-96	1
AACCGGGGGACGTAAGCGCC	IQCJ-SCHIP1	HGLibA_30813	AACCGGGGGACGTAAGCGCC	12	IQCJ-SCHIP1	1
GATCAACCGCAACGCCCGTG	IRAK1	HGLibA_30840	GATCAACCGCAACGCCCGTG	12	IRAK1	1
CATACTTACTCCATAATTAG	ITFG1	HGLibA_30995	CATACTTACTCCATAATTAG	12	ITFG1	1
CATGCTAGCTCCGCCTCGCT	KCP	HGLibA_31697	CATGCTAGCTCCGCCTCGCT	12	KCP	1
TCATGACTTCGAGTGTCCCA	KERA	HGLibA_31842	TCATGACTTCGAGTGTCCCA	12	KERA	1
TGTTTGAGGGCCTCTTCTAA	KIAA1377	HGLibA_32032	TGTTTGAGGGCCTCTTCTAA	12	KIAA1377	1
GAGCAGTACACGACCATCCA	KIAA1919	HGLibA_32113	GAGCAGTACACGACCATCCA	12	KIAA1919	1
ACAGTAAGATCCACAAGTCA	KRT86	HGLibA_32861	ACAGTAAGATCCACAAGTCA	12	KRT86	1
[truncated: 2,173 more rows]

## Sheet: GIST-T1-b
seq	gene_id	UID	seq	Total reads of sgRNAs	gene_id	sgRNA diversity
AACCGCCACGATGATGTTCT	FOS	HGLibB_17771	AACCGCCACGATGATGTTCT	58434	FOS	2
AGTACTGCAGTAGGGTCATT	NR3C1	HGLibB_32574	AGTACTGCAGTAGGGTCATT	1768	NR3C1	2
AAAGAATTTCCCTTCGCTTT	CREB1	HGLibB_11076	AAAGAATTTCCCTTCGCTTT	623	CREB1	2
AGCAGTCAATTCAGTGGATC	TCF12	HGLibB_48703	AGCAGTCAATTCAGTGGATC	600	TCF12	2
GTGGAGGAGCCATTGTCCAG	ARNT	HGLibB_03061	GTGGAGGAGCCATTGTCCAG	137	ARNT	2
GATGTCCGTCAGTATGTTCA	LYZ	HGLibB_27740	GATGTCCGTCAGTATGTTCA	101	LYZ	2
AGCGAGTCTTATCATTGTCC	ENO1	HGLibB_15118	AGCGAGTCTTATCATTGTCC	52	ENO1	2
TGAAGACATGCTGAGCTACA	TSPY2	HGLibB_51901	TGAAGACATGCTGAGCTACA	39	TSPY2	2
TCCAAGTCCTGCATGTAGCC	IRF1	HGLibB_23537	TCCAAGTCCTGCATGTAGCC	8258	IRF1	1
ATCGTTTCCGCTTAACGGCG	NonTargetingControlGuideForHuman_0003	HGLibB_57031	ATCGTTTCCGCTTAACGGCG	2569	NonTargetingControlGuideForHuman_0003	1
TGAAGTCGATGGCGCGCTCG	CEBPB	HGLibB_08952	TGAAGTCGATGGCGCGCTCG	462	CEBPB	1
CCCAAAGGTAAACTATCCAG	NPIPL3	HGLibB_32433	CCCAAAGGTAAACTATCCAG	96	NPIPL3	1
TTTAAATGAGCTCCCAATGT	HIF1A	HGLibB_21269	TTTAAATGAGCTCCCAATGT	94	HIF1A	1
CAAGCTGGCGTCGCCCGAGC	JUN	HGLibB_23969	CAAGCTGGCGTCGCCCGAGC	75	JUN	1
AGGAGTGTTATGAAAAGGCT	NonTargetingControlGuideForHuman_0911	HGLibB_57939	AGGAGTGTTATGAAAAGGCT	69	NonTargetingControlGuideForHuman_0911	1
ACGCTCAGCACCCGCTATGC	NonTargetingControlGuideForHuman_0211	HGLibB_57239	ACGCTCAGCACCCGCTATGC	64	NonTargetingControlGuideForHuman_0211	1
CTCACCTGGGGCGAACCTCT	PRAMEF8	HGLibB_38279	CTCACCTGGGGCGAACCTCT	63	PRAMEF8	1
CATCAGGTTTGATGAAATCC	PKM	HGLibB_36784	CATCAGGTTTGATGAAATCC	61	PKM	1
ACGATCGGTAATGGTCTGTT	NonTargetingControlGuideForHuman_0270	HGLibB_57298	ACGATCGGTAATGGTCTGTT	58	NonTargetingControlGuideForHuman_0270	1
ATGTCTAGACCTAATCGTTT	NonTargetingControlGuideForHuman_0420	HGLibB_57448	ATGTCTAGACCTAATCGTTT	54	NonTargetingControlGuideForHuman_0420	1
CGACGGTAATGCACCTACTA	NonTargetingControlGuideForHuman_0248	HGLibB_57276	CGACGGTAATGCACCTACTA	52	NonTargetingControlGuideForHuman_0248	1
ACTTACTTTGTCCAACGCAT	CT45A4	HGLibB_11494	ACTTACTTTGTCCAACGCAT	47	CT45A4	1
CGAACTTAATCCCGTGGCAA	NonTargetingControlGuideForHuman_0094	HGLibB_57122	CGAACTTAATCCCGTGGCAA	44	NonTargetingControlGuideForHuman_0094	1
GAGCGCTGCTCAGATAGCGA	TP53	HGLibB_50984	GAGCGCTGCTCAGATAGCGA	40	TP53	1
CGACAACGTGCAGGTGTATC	NonTargetingControlGuideForHuman_0244	HGLibB_57272	CGACAACGTGCAGGTGTATC	35	NonTargetingControlGuideForHuman_0244	1
GGCTTCCCTCCCAACAGCAT	FAM156A	HGLibB_16163	GGCTTCCCTCCCAACAGCAT	34	FAM156A	1
GTAAAGAAGCGGAAAGGTCC	NonTargetingControlGuideForHuman_0533	HGLibB_57561	GTAAAGAAGCGGAAAGGTCC	30	NonTargetingControlGuideForHuman_0533	1
ATTAGCACGGCGACCTTCTA	NonTargetingControlGuideForHuman_0136	HGLibB_57164	ATTAGCACGGCGACCTTCTA	29	NonTargetingControlGuideForHuman_0136	1
CATTAGTCTGATACCTGTGC	NonTargetingControlGuideForHuman_0661	HGLibB_57689	CATTAGTCTGATACCTGTGC	29	NonTargetingControlGuideForHuman_0661	1
GAAACAACAGAAGAAACAAG	GOLGA8A	HGLibB_19613	GAAACAACAGAAGAAACAAG	26	GOLGA8A	1
TAGCTACATGTATCAGACAG	ATPBD4	HGLibB_03801	TAGCTACATGTATCAGACAG	24	ATPBD4	1
GACGCCCTAATGCCCATCGT	NonTargetingControlGuideForHuman_0335	HGLibB_57363	GACGCCCTAATGCCCATCGT	24	NonTargetingControlGuideForHuman_0335	1
CACTTACACATGAGGCGGTA	NonTargetingControlGuideForHuman_0553	HGLibB_57581	CACTTACACATGAGGCGGTA	24	NonTargetingControlGuideForHuman_0553	1
TATGACCCTGTTACATTGCC	NonTargetingControlGuideForHuman_0696	HGLibB_57724	TATGACCCTGTTACATTGCC	24	NonTargetingControlGuideForHuman_0696	1
CCAAAAAGATGAATATCTCG	NonTargetingControlGuideForHuman_0782	HGLibB_57810	CCAAAAAGATGAATATCTCG	24	NonTargetingControlGuideForHuman_0782	1
TACCATCTCGTTGGCCTCGT	SPANXD	HGLibB_46336	TACCATCTCGTTGGCCTCGT	23	SPANXD	1
CACCAAGTGCTCGTCCAACT	USP17L13	HGLibB_53157	CACCAAGTGCTCGTCCAACT	23	USP17L13	1
ATCGGTACCTCTTCACATAT	NonTargetingControlGuideForHuman_0261	HGLibB_57289	ATCGGTACCTCTTCACATAT	22	NonTargetingControlGuideForHuman_0261	1
TAGAGATATCCGATCGTGGT	NonTargetingControlGuideForHuman_0156	HGLibB_57184	TAGAGATATCCGATCGTGGT	21	NonTargetingControlGuideForHuman_0156	1
TGTTTTGCATGTTGCATAGG	NonTargetingControlGuideForHuman_0898	HGLibB_57926	TGTTTTGCATGTTGCATAGG	21	NonTargetingControlGuideForHuman_0898	1
AGAAGACCGAGGCGCTTCAA	NonTargetingControlGuideForHuman_0290	HGLibB_57318	AGAAGACCGAGGCGCTTCAA	20	NonTargetingControlGuideForHuman_0290	1
ACTTACCCTGTAACATTCAA	RANBP2	HGLibB_40149	ACTTACCCTGTAACATTCAA	20	RANBP2	1
ATTTAAACCGTTACACAGTC	NonTargetingControlGuideForHuman_0606	HGLibB_57634	ATTTAAACCGTTACACAGTC	19	NonTargetingControlGuideForHuman_0606	1
TCTGGGCTGCTAAACTCATC	SAA4	HGLibB_42564	TCTGGGCTGCTAAACTCATC	18	SAA4	1
TCTCCCTCCTGAGCAGCTGC	GAGE10	HGLibB_18409	TCTCCCTCCTGAGCAGCTGC	17	GAGE10	1
CAGACGGTTGGTAAGGACGC	NonTargetingControlGuideForHuman_0288	HGLibB_57316	CAGACGGTTGGTAAGGACGC	16	NonTargetingControlGuideForHuman_0288	1
CCTGTCGCTATCGTTAGAGA	NonTargetingControlGuideForHuman_0408	HGLibB_57436	CCTGTCGCTATCGTTAGAGA	16	NonTargetingControlGuideForHuman_0408	1
TCTCTCGATGCTAATCACAC	C20orf111	HGLibB_05976	TCTCTCGATGCTAATCACAC	15	C20orf111	1
CAAACAGTCTAAGGCGACGA	NonTargetingControlGuideForHuman_0219	HGLibB_57247	CAAACAGTCTAAGGCGACGA	15	NonTargetingControlGuideForHuman_0219	1
TAGCTCGAGTCATTTCTCTA	NonTargetingControlGuideForHuman_0571	HGLibB_57599	TAGCTCGAGTCATTTCTCTA	14	NonTargetingControlGuideForHuman_0571	1
CAGTCACTCCCTGTTCCAAC	OR4F29	HGLibB_33955	CAGTCACTCCCTGTTCCAAC	14	OR4F29	1
TTCCTAGGTGCTGCTTACAG	BPY2	HGLibB_04740	TTCCTAGGTGCTGCTTACAG	13	BPY2	1
CTAATCACGACCTCACCCTA	NonTargetingControlGuideForHuman_0260	HGLibB_57288	CTAATCACGACCTCACCCTA	13	NonTargetingControlGuideForHuman_0260	1
ATGCGCAGCTCCAGAATTTT	NonTargetingControlGuideForHuman_0674	HGLibB_57702	ATGCGCAGCTCCAGAATTTT	13	NonTargetingControlGuideForHuman_0674	1
TCCCTGCATTCATGGTTTTA	NonTargetingControlGuideForHuman_0923	HGLibB_57951	TCCCTGCATTCATGGTTTTA	13	NonTargetingControlGuideForHuman_0923	1
TTCGCACGATTGCACCTTGG	NonTargetingControlGuideForHuman_0060	HGLibB_57088	TTCGCACGATTGCACCTTGG	12	NonTargetingControlGuideForHuman_0060	1
GGAGATGAAGACCCTGTTCC	OBP2A	HGLibB_33180	GGAGATGAAGACCCTGTTCC	12	OBP2A	1
GATTGATGCTAGCACACTCA	PPP1CB	HGLibB_37958	GATTGATGCTAGCACACTCA	12	PPP1CB	1
AGGACACAGGATACGCAGCT	NonTargetingControlGuideForHuman_0841	HGLibB_57869	AGGACACAGGATACGCAGCT	11	NonTargetingControlGuideForHuman_0841	1
TTCCTTACCTTTCTCTTCCC	SPATA31A1	HGLibB_46411	TTCCTTACCTTTCTCTTCCC	10	SPATA31A1	1
GAATGGGGCAGTGCATTAAA	ARHGAP11B	HGLibB_02703	GAATGGGGCAGTGCATTAAA	9	ARHGAP11B	1
GATCATAATCGCTTCAAGCA	NonTargetingControlGuideForHuman_0582	HGLibB_57610	GATCATAATCGCTTCAAGCA	9	NonTargetingControlGuideForHuman_0582	1
AATTAACAAGAAATGCCAGT	OR4F16	HGLibB_33946	AATTAACAAGAAATGCCAGT	9	OR4F16	1
CTTACCTGAGCAGGTGCTCC	PRAMEF10	HGLibB_38233	CTTACCTGAGCAGGTGCTCC	9	PRAMEF10	1
TTGTCACTGAGCTTGACTCC	GOLGA6B	HGLibB_19583	TTGTCACTGAGCTTGACTCC	8	GOLGA6B	1
AGGTTGAATACCCCTTACTA	NonTargetingControlGuideForHuman_0593	HGLibB_57621	AGGTTGAATACCCCTTACTA	8	NonTargetingControlGuideForHuman_0593	1
AGTATGTTTACCTTAGGTAG	UGT2B28	HGLibB_52858	AGTATGTTTACCTTAGGTAG	8	UGT2B28	1
GTAGGCGCGCCGCTCTCTAC	NonTargetingControlGuideForHuman_0004	HGLibB_57032	GTAGGCGCGCCGCTCTCTAC	7	NonTargetingControlGuideForHuman_0004	1
TCCTGGATACCGCGTGGTTA	NonTargetingControlGuideForHuman_0070	HGLibB_57098	TCCTGGATACCGCGTGGTTA	7	NonTargetingControlGuideForHuman_0070	1
GAGTAATTTCGAACGTATTG	NonTargetingControlGuideForHuman_0275	HGLibB_57303	GAGTAATTTCGAACGTATTG	7	NonTargetingControlGuideForHuman_0275	1
GTTGCGAGTTACTATTGGTT	NonTargetingControlGuideForHuman_0325	HGLibB_57353	GTTGCGAGTTACTATTGGTT	7	NonTargetingControlGuideForHuman_0325	1
CACGCACAATCCTTCACGCA	NonTargetingControlGuideForHuman_0484	HGLibB_57512	CACGCACAATCCTTCACGCA	7	NonTargetingControlGuideForHuman_0484	1
CGAAACCTCCTAACTGAGAG	NonTargetingControlGuideForHuman_0509	HGLibB_57537	CGAAACCTCCTAACTGAGAG	7	NonTargetingControlGuideForHuman_0509	1
ATACTCTCACAGGTACATAA	NonTargetingControlGuideForHuman_0836	HGLibB_57864	ATACTCTCACAGGTACATAA	7	NonTargetingControlGuideForHuman_0836	1
AGATTACATAGGAACTATAC	TMEM48	HGLibB_50356	AGATTACATAGGAACTATAC	7	TMEM48	1
CACATGGGGTACAGCACACC	NonTargetingControlGuideForHuman_0650	HGLibB_57678	CACATGGGGTACAGCACACC	6	NonTargetingControlGuideForHuman_0650	1
ATGCCTTAGACTTAACCTCG	NonTargetingControlGuideForHuman_0664	HGLibB_57692	ATGCCTTAGACTTAACCTCG	6	NonTargetingControlGuideForHuman_0664	1
CTGAAGCTGTTACTTGCTCT	SPRR2F	HGLibB_46763	CTGAAGCTGTTACTTGCTCT	6	SPRR2F	1
GGTTTTATAAGGGTGGGCCT	NonTargetingControlGuideForHuman_0652	HGLibB_57680	GGTTTTATAAGGGTGGGCCT	5	NonTargetingControlGuideForHuman_0652	1
AACCACGGCATTGAGAGGTG	NonTargetingControlGuideForHuman_0904	HGLibB_57932	AACCACGGCATTGAGAGGTG	5	NonTargetingControlGuideForHuman_0904	1
TCTGGCTTGACACGACCGTT	NonTargetingControlGuideForHuman_0085	HGLibB_57113	TCTGGCTTGACACGACCGTT	4	NonTargetingControlGuideForHuman_0085	1
ATCGTTGCTGACAGGATCTA	NonTargetingControlGuideForHuman_0427	HGLibB_57455	ATCGTTGCTGACAGGATCTA	4	NonTargetingControlGuideForHuman_0427	1
CTTTTCAGCTGAGACGTACG	NonTargetingControlGuideForHuman_0739	HGLibB_57767	CTTTTCAGCTGAGACGTACG	4	NonTargetingControlGuideForHuman_0739	1
CCACGATGCCACCTCATCCC	NonTargetingControlGuideForHuman_0764	HGLibB_57792	CCACGATGCCACCTCATCCC	4	NonTargetingControlGuideForHuman_0764	1
CGTGTGTGGGTAAACGGAAA	NonTargetingControlGuideForHuman_0766	HGLibB_57794	CGTGTGTGGGTAAACGGAAA	4	NonTargetingControlGuideForHuman_0766	1
GCTAGTTTCTGTTAGCTCCT	NonTargetingControlGuideForHuman_0961	HGLibB_57989	GCTAGTTTCTGTTAGCTCCT	4	NonTargetingControlGuideForHuman_0961	1
AATAGAAGACATTCTATTCA	GTF2H2D	HGLibB_20526	AATAGAAGACATTCTATTCA	3	GTF2H2D	1
TTATGTGAGCACGCCATTAC	NonTargetingControlGuideForHuman_0247	HGLibB_57275	TTATGTGAGCACGCCATTAC	3	NonTargetingControlGuideForHuman_0247	1
CCAATGATAAGCCCGAACGG	NonTargetingControlGuideForHuman_0355	HGLibB_57383	CCAATGATAAGCCCGAACGG	3	NonTargetingControlGuideForHuman_0355	1
AGGATGCTGAACAAGTACGT	NonTargetingControlGuideForHuman_0797	HGLibB_57825	AGGATGCTGAACAAGTACGT	3	NonTargetingControlGuideForHuman_0797	1
GAAGGCAAGCCACCAACATC	GOLGA6L1	HGLibB_19593	GAAGGCAAGCCACCAACATC	2	GOLGA6L1	1
CCTTAGGCAATATAAAGTCC	NBPF15	HGLibB_31183	CCTTAGGCAATATAAAGTCC	2	NBPF15	1
CTATAACCGAATCAAAGGGT	NonTargetingControlGuideForHuman_0402	HGLibB_57430	CTATAACCGAATCAAAGGGT	2	NonTargetingControlGuideForHuman_0402	1
TCGGCTCCTGAAGCCAGTAT	NonTargetingControlGuideForHuman_0487	HGLibB_57515	TCGGCTCCTGAAGCCAGTAT	2	NonTargetingControlGuideForHuman_0487	1
CGTTGCCCACCCCGCTCTTG	PABPC1L2A	HGLibB_34880	CGTTGCCCACCCCGCTCTTG	2	PABPC1L2A	1
TGCCCCAGACCCATGTGCAA	POMZP3	HGLibB_37625	TGCCCCAGACCCATGTGCAA	2	POMZP3	1
AAAACCGGCTTCCACTTCTG	CTRB1	HGLibB_11664	AAAACCGGCTTCCACTTCTG	1	CTRB1	1
GCTGTGTTTGTTCTTCCCTT	USP17L1P	HGLibB_53172	GCTGTGTTTGTTCTTCCCTT	1	USP17L1P	1
GCCGAGCGCAGAGCATTGGC	FOS	HGLibB_17772	GCCGAGCGCAGAGCATTGGC	512
GATGGAGGAGAGCTTACATC	NR3C1	HGLibB_32575	GATGGAGGAGAGCTTACATC	383
TGAATAGGCTGAGCTTTGTG	ARNT	HGLibB_03060	TGAATAGGCTGAGCTTTGTG	104
TACCATGCTCTAATGCCTTG	LYZ	HGLibB_27741	TACCATGCTCTAATGCCTTG	73
TATACTGTCCACTGCTAGTT	CREB1	HGLibB_11075	TATACTGTCCACTGCTAGTT	58
TCCCTGTACAGCAGAGATAC	TCF12	HGLibB_48701	TCCCTGTACAGCAGAGATAC	16
TTCAGAGCTGCTGTGCCCAG	ENO1	HGLibB_15117	TTCAGAGCTGCTGTGCCCAG	6
GATGTTCACCAGATATTCCT	TSPY2	HGLibB_51902	GATGTTCACCAGATATTCCT	5
